# Supplementary material for: Medical students’ knowledge, attitudes and perceptions towards contraceptive use and counselling: a cross-sectional survey in Maharashtra, India
Source: PubMed Central journal article supplement — BMJ Open. 2013 Dec 11;3(12):e003739. doi: 10.1136/bmjopen-2013-003739 (PMC3863118; doi:10.1136/bmjopen-2013-003739), 2013-12-11
Supplement: bmjopen-2013-003739.draft_revisions.pdf [file bmjopen-2013-003739.draft_revisions.pdf]

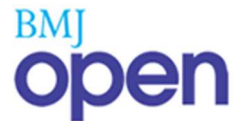

**Future physicians' knowledge, attitudes, and perceptions on contraceptive use and counselling: a cross-sectional survey among medical interns in Maharashtra, India**

|                                 |                                                                                                                                                                                                                                                                                                                                                                                                                                                                        |
|---------------------------------|------------------------------------------------------------------------------------------------------------------------------------------------------------------------------------------------------------------------------------------------------------------------------------------------------------------------------------------------------------------------------------------------------------------------------------------------------------------------|
| Journal:                        | <i>BMJ Open</i>                                                                                                                                                                                                                                                                                                                                                                                                                                                        |
| Manuscript ID:                  | bmjopen-2013-003739                                                                                                                                                                                                                                                                                                                                                                                                                                                    |
| Article Type:                   | Research                                                                                                                                                                                                                                                                                                                                                                                                                                                               |
| Date Submitted by the Author:   | 05-Aug-2013                                                                                                                                                                                                                                                                                                                                                                                                                                                            |
| Complete List of Authors:       | Hogmark, Sara; Uppsala University, Womens and Childrens Health; Falu County Hospital, Obstetrics and Gynaecology<br>klingberg-allvin, marie; Uppsala University, Womens and Childrens Health; Dalarna University, School of Social and Health Science<br>Gemzell, Kristina; Karolinska Institutet, Womens and Childrens Health<br>Ohlsson, Hannes; Uppsala University, Womens and Childrens Health<br>Essen, Birgitta; Uppsala University, Womens and Childrens Health |
| <b>Primary Subject Heading</b>: | Obstetrics and gynaecology                                                                                                                                                                                                                                                                                                                                                                                                                                             |
| Secondary Subject Heading:      | Global health, Obstetrics and gynaecology, Public health, Sexual health                                                                                                                                                                                                                                                                                                                                                                                                |
| Keywords:                       | Reproductive medicine < GYNAECOLOGY, PUBLIC HEALTH, Quality in health care < HEALTH SERVICES ADMINISTRATION & MANAGEMENT                                                                                                                                                                                                                                                                                                                                               |
|                                 |                                                                                                                                                                                                                                                                                                                                                                                                                                                                        |

SCHOLARONE™  
Manuscripts

only

1  
2  
3  
4  
5  
6  
7  
8 Title: Future physicians' knowledge, attitudes, and perceptions on contraceptive use and  
9 counselling: a cross-sectional survey among medical interns in Maharashtra, India  
10  
11  
12  
13

14  
15 Sara Hogmark, MD, Dept. of Obstetrics and Gynaecology, Falu County Hospital, Falun,  
16 Sweden; Dept. of Women's and Children's Health (IMCH), Uppsala University, Sweden  
17  
18  
19

20 Marie Klingberg-Allvin, Senior Lecturer, Dept. of Women's and Children's Health, Uppsala  
21 University; Dept. of Women's and Children's Health, Karolinska Institutet; School of Social  
22 and Health Science, Dalarna University, Sweden  
23  
24  
25

26 Hannes Ohlsson, MD, Dept. of Women's and Children's Health (IMCH), Uppsala University,  
27 Sweden  
28  
29  
30

31 Kristina Gemzell-Danielsson, Professor, Dept. of Women's and Children's Health,  
32 Karolinska Institutet, Sweden  
33  
34  
35

36  
37 Birgitta Essén, Asst. Prof., Dept. of Women's and Children's Health (IMCH), Uppsala  
38 University, Sweden  
39  
40  
41

42 Corresponding Author: Sara Hogmark, Dept. of Obstetrics and Gynaecology, Falu County  
43 Hospital, 79182 Falun, Sweden  
44  
45

46 Phone: 046-(0)23-492000 E-mail: [sara.hogmark@ltdalarna.se](mailto:sara.hogmark@ltdalarna.se)  
47  
48

49 Keywords: contraceptives, medical students, India, reproductive health, cross sectional survey  
50  
51

52 Word count: 2861 (excluding abstract and references)  
53  
54  
55

### Article focus

Contraceptive use is an effective primary prevention strategy to avoid unintended pregnancies and unsafe abortions and thus reduces maternal mortality and morbidity.

This study aimed to investigate knowledge and perceptions on contraceptive use and counselling among future physicians in Maharashtra, India.

### Key message points

Despite positive attitudes towards modern contraceptives, sex education, and family planning counselling future physicians in Maharashtra have fair knowledge and misconceptions about modern contraceptive.

Respondents expressed a desire to provide sexual and reproductive health services to people regardless of their marital status.

Pre- and in-service training in evidence-based contraceptive counselling should be implemented in order to decrease unplanned pregnancies and unsafe abortions in India.

### Strengths and Limitations

This study contributes with important evidence that may be used to revise pre- and in service training in contraceptive counselling and thus reduce maternal mortality related to unintended pregnancies in India.

Important limitation with this study is the non-probability sampling technique applied and this might reduce the external validity.

The large sample size and the high proportion of the total number and the presence of interns from public and private medical schools in both urban and semi-urban settings strengthen the generalizability.

## ABSTRACT

*Background:* Considerable global maternal mortality and morbidity could be avoided through the use of effective contraception. In India, contraception services are frequently unavailable or there are obstacles to obtaining modern, reversible contraceptives. This study aimed to investigate knowledge and perceptions on contraceptive use and counselling among future physicians in Maharashtra, India.

*Study design:* A cross-sectional descriptive study using a self-administered questionnaire was conducted among 1996 medical interns in their fifth year of study at 27 medical colleges in the state of Maharashtra, India. Descriptive and analytical statistics interpreted the survey instrument and significant results were presented with a 95% confidence interval.

*Results:* Respondents expressed the desire to provide contraceptive services and individual counselling. They had a fair knowledge of contraception, but showed some misconceptions about modern methods and the impact of sex education. Attitudes towards contraception were positive, pre-marital counselling was supported, and the influence of traditional values and negative provider attitudes on services was recognized. Gender, area of upbringing, and type of medical college did not change the results.

*Conclusions:* Pre- and in-service training of providers in evidence-based contraceptive counselling would decrease unplanned pregnancies and reduce unsafe abortions in the region studied. Expanding the provider base to health care professionals other than physicians would increase the availability of services.

## INTRODUCTION

Contraceptive use is an effective primary prevention strategy for reducing maternal mortality [1]. It has been estimated that the use of effective contraception could avert 90% of abortion-related and more than 20% of obstetric-related mortality globally [2]. Abortion incidence is inversely associated with the level of contraceptive use, especially where fertility rates are stable [3]. In addition, comprehensive sex education has the potential to prevent unintended pregnancies that lead to unsafe abortions [4]. The growing number of people of reproductive age in developing countries poses a challenge for family planning programmes and health care services. In order to meet the increasing demand for contraceptives and ensure the sexual and reproductive health and rights of women, including the right to planned parenthood, intensified efforts are urgently needed [5].

India accounts for 20% of maternal deaths worldwide. Every year, nearly 60,000 women in India die from complications related to pregnancy [6]. Approximately 6.7 million induced abortions take place in India annually. Despite the fact that induced abortion has been legal in India since 1971 [7], most abortions are performed in an unsafe manner and put women's health and lives at risk [8]. Moreover, a recent study concluded that 70% of all Indian women who have an abortion do not use post-abortion contraception [9]. The unmet need for family planning among married women is 14%. The overall unmet need for modern contraceptives is 22% in the cities and higher in rural areas. Among married women in India, 56% use some form of contraception and 49% use a modern method. Female sterilization is the most common contraceptive practice and accounts for 75% of all methods used [10]. The use of reversible, modern methods in order to postpone birth of a first child or for spacing births is infrequent: male condoms are used by 5%, the pill 3%, IUD 2%, injection 1%, and male sterilisation 1% [11].

Some of the barriers that impede women's access to contraception are health care providers who are inadequately trained, insufficient in number, and poorly supervised [12]. Studies have shown that improving quality of care increases and sustains contraceptive use by women

1  
2  
3  
4  
5  
6  
7  
8 [13]. Providers need adequate knowledge of contraceptive methods and training in  
9 counselling skills in order to provide reliable information to women to avoid unintended  
10 pregnancy [14]. Despite the availability of effective methods of contraception in India, many  
11 pregnancies remain unplanned and unintended. Considering the future role of medical  
12 students and interns as contraceptive counsellors, little is known about their views on  
13 contraceptive methods, use or counselling. This study aimed to investigate knowledge and  
14 perceptions on contraceptive use and counselling among future physicians in Maharashtra,  
15 India.  
16  
17  
18  
19  
20  
21

## 22 **MATERIALS AND METHODS**

23  
24  
25 In February 2011, a cross-sectional survey was conducted using a pre-tested, self-  
26 administered questionnaire in the Indian state of Maharashtra among 1996 medical students in  
27 their fifth year (internship) of training [15]. Out of a total of 43 medical colleges in  
28 Maharashtra, a convenience sample of 27 colleges (8 government, 19 private) was included.  
29 All medical interns at the selected institutions were asked to participate before they were to  
30 take a pre-service CAC orientation program. In the State of Maharashtra out of 43 medical  
31 colleges (5195 students) 19 are Public (2200 students). In total 27 colleges (8 public, 19  
32 private) were included in the study and 1423 and 573 students participated from private and  
33 public colleges respectively.  
34  
35  
36  
37  
38  
39  
40

### 41 **Study setting**

42  
43  
44 Maharashtra is located in west-central India. It is the country's second most populous state  
45 and the third largest by area. Of its 112 million inhabitants, a slight majority live in rural  
46 areas. Mumbai, India's largest city, is the capital of the state. Maharashtra's socio-economic  
47 status, literacy rate, and health infrastructure are better than the national average [16]. Medical  
48 education in India is regulated by the Medical Council of India and is either public or private.  
49 Medical education consists of 4.5 years of theoretical studies followed by one year of  
50  
51  
52  
53  
54  
55  
56  
57  
58  
59  
60

1  
2  
3  
4  
5  
6  
7  
8 internship, which includes a two-month rotation in obstetrics/gynaecology and three months  
9 of community medicine [17].  
10

### 11 12 13 **Instrument**

14  
15 The questionnaire contained three sections. Section 1 included socio-demographic  
16 characteristics as gender, age, religion, marital status, place of birth/area of upbringing, and  
17 type of college. Section 2 included questions related to the medical curriculum and questions  
18 concerning perceptions of contraceptive methods and services.  
19  
20  
21

22  
23 Section 3 consisted of twelve statements on different aspects of contraceptive methods,  
24 services, and values surrounding sexual and reproductive health. Participants were asked to  
25 circle the most appropriate alternative on a five-point Likert scale (Disagree  
26 completely/Disagree/Neither agree nor disagree/Agree/Agree completely) [18].  
27  
28  
29  
30

### 31 **Statistical analysis**

32  
33 Questionnaires that contained one or more answers were included in the analysis. Statistical  
34 Package for Social Studies (SPSS) 20.0 software was used. Descriptive statistics were applied  
35 to all sections of the questionnaire; actual numbers and proportions were calculated; and  
36 cross-tabulations with intergroup comparisons of answers were made for interns of different  
37 genders, types of colleges, and places of birth. The alternatives 'agree' and 'agree completely'  
38 were aggregated, as well as the alternatives 'disagree' and 'disagree completely'. Any  
39 difference with a 95% confidence interval (CI) was regarded as significant.  
40  
41  
42  
43  
44  
45

### 46 **Ethical considerations**

47  
48 The study was carried out in compliance with the principles of the World Medical Association  
49 Declaration of Helsinki. The medical interns eligible for participation in the study were given  
50 oral information about the study and were informed that participation was anonymous and  
51 voluntary and that choosing not to participate would not affect their studies or future careers  
52  
53  
54  
55  
56

1  
2  
3  
4  
5  
6  
7  
8 negatively. By filling in the questionnaire written consent to participation was given.  
9  
10 Permission to conduct the survey in connection with the training programme was obtained  
11 from the principal at each college. The study has been approved by the research ethical  
12 committee at Karolinska Institutet (Dnr: 2013/415-31/4).  
13  
14

## 15 **RESULTS**

16  
17  
18 Out of 2,006 questionnaires, 1,996 were at least partially filled-in, making the overall  
19 response rate 99.5%. The demographic characteristics of the interns are outlined in Table 1.  
20 Since the interns were homogenous in terms of age, religion, and marital status, the variables  
21 remaining for inter-group comparisons were gender (57% male, 43% female), place of birth  
22 (72% urban, 25% rural), and type of college (71% private, 29% public).  
23  
24  
25  
26  
27

28 Table 2 shows the respondents' coursework on sexual and reproductive health. Most of the  
29 interns thought that the topic of reproductive health had been adequately covered in their  
30 curriculum, including contraceptive methods. A majority considered their theoretical  
31 knowledge in sexual and reproductive health fair or good. A large proportion reported having  
32 had no clinical practice in abortion care services during their training. A comparison between  
33 interns from private and public colleges revealed no significant differences.  
34  
35  
36  
37  
38

39 With regard to contraceptive counselling, 74% believed it should be given individually and  
40 not in a group. A majority of the respondents (67%) thought doctors should be the ones to  
41 provide contraception to patients, while 27% considered health workers to be the most  
42 appropriate counsellors. A few interns chose other alternatives (nurse 3%, other 1%, missing  
43 1%). A majority (95%) indicated they would like to have responsibility for providing  
44 information on contraception as future doctors. Regarding the use of oral contraceptives, 89%  
45 of the interns stated they should be taken every day. Some interns (6%) thought they were to  
46 be taken after intercourse or once a month (3%). A cross-sectional analysis of answers given  
47 by interns with rural versus urban places of birth revealed no significant differences with  
48 regard to contraceptive counselling. However, those from private colleges preferred  
49  
50  
51  
52  
53  
54  
55  
56



1  
2  
3  
4  
5  
6  
7  
8 individual contraceptive counselling over group counselling (private college interns 78%, CI  
9 95%, 75.9–80.3; public college interns 71%, CI 95%, 66.6–74.4). Female interns were also  
10 more supportive of individual counselling than males (females 80%, CI 95%, 77.4–82.9;  
11 males 73%, CI 95%, 70.1–75.4). Females also expressed a greater interest in having  
12 responsibility for providing contraceptive information as future doctors than males (females  
13 98%, CI 95%, 96.8–98.8; males 95% CI, 93.8–96.4). Moreover, female interns were better  
14 informed on the daily intake of oral contraceptive pills than males (females 93%, CI 95%,  
15 91.5–94.9; males 89%, CI 95%, 86.8–90.6).

16  
17  
18  
19  
20  
21  
22 The knowledge, attitudes, and perceptions of medical interns on contraceptive methods,  
23 services, and values surrounding sexual and reproductive health are shown in Table 3. Cross-  
24 sectional analysis comparing interns from public and private colleges indicated a difference of  
25 opinion regarding the statement “Doctors working in abortion service have friendly attitudes  
26 towards unmarried women”. Fewer interns from private colleges agreed or agreed completely  
27 as compared to interns from public colleges (private college interns 44%, CI 95%, 41.8–46.4;  
28 public college interns 51%, CI 95%, 47.0–51.4). A comparison of the answers based on the  
29 interns’ place of birth (urban or rural) revealed significant differences in responses to three  
30 statements: “Contraceptive pills might cause cancer”; “Doctors working in abortion service  
31 have friendly attitudes towards unmarried women”; and “Sex education encourages unmarried  
32 people to have sex” (Table 4).

33  
34  
35  
36  
37  
38  
39  
40  
41  
42 Table 5 compares male and female medical interns’ knowledge, attitudes, and perceptions on  
43 contraception. More female interns agreed or agreed completely that contraceptive pills might  
44 cause cancer. Males tended to believe that emergency contraceptive pills may be used several  
45 times a month. Both male and female interns largely agreed or agreed completely that  
46 condoms protect against sexually transmitted diseases (STD) and HIV, although females were  
47 significantly more supportive of their use. One in five males versus one in ten females agreed  
48 or agreed completely that sex education encourages unmarried people to have sex. Among  
49 males, 50% agreed or agreed completely that doctors working in abortion services have  
50 friendly attitudes towards unmarried women, compared to 39% among females.

## DISCUSSION

Our findings suggest that although the medical interns surveyed had a fair knowledge and a positive attitude toward contraception and pre-marital counselling, they also had misconceptions about modern contraceptive methods and the impact of sex education. They recognized the influence of traditional values and negative provider attitudes regarding contraceptive services, and they expressed a clear interest in disseminating contraceptive information as future physicians.

Very few respondents had had any clinical experience in abortion care services, yet a majority thought the topics of sexual and reproductive health and contraceptive methods had been adequately covered in their coursework. Still, nearly one in five interns falsely believed that contraceptive pills can cause infertility. More females than males were unaware that emergency contraceptive pills may be used several times a month. Recent studies indicate that family planning training during residency improve future physicians proficiency in both uterine evacuation and contraceptive counselling[19].

Our findings did not reveal any differences in self-rated or theoretical knowledge between public and private college interns. The background factor that had the greatest influence on knowledge was gender. Female interns were better informed about the dosage of oral contraceptives and the protection that condoms offer against STD/HIV. They also report that sex education does not encourage unmarried people to have sex. Regardless of demographic background, most interns in our study recognized that traditional values are barriers to sex education. Few thought contraceptive information should only be provided to married couples, although interns born in rural areas had more negative perceptions of sex education. The socio-cultural norms of Indian society contribute to making sex-related issues taboo and hinder young people from seeking counselling regarding sexual health. At the same time, premarital sex is increasing among Indian youth [20]. Although comprehensive sex education has been shown to have a positive impact on young people's risky sexual behaviour [21], in parts of India sex education has been banned in schools [20]. Young people in India have

1  
2  
3  
4  
5  
6  
7  
8 expressed a desire for formal sex education and doctors are their preferred source of advice  
9 [22]. India is known to have negative attitudes toward pre-marital sex and a reluctance to  
10 provide married couples with contraceptives before they have had at least one child [23].  
11 Other research reveals that health care providers often impose unnecessary barriers in  
12 dispensing contraceptives, including denial of a contraceptive method on the basis of age,  
13 parity, marital status, or lack of parental or spousal authorization [24]. A review of studies  
14 from developing countries indicates a similar pattern [25]. One in four respondents in our  
15 study did not believe doctors working in abortion services held positive attitudes towards  
16 unmarried women. However, as noted above, most interns supported providing contraceptive  
17 information to unmarried couples. Females expressed a slightly greater interest in working  
18 with contraceptive services in their medical practice than males. Although nearly all interns in  
19 our survey said they would like to assume the responsibility for contraceptive counselling in  
20 their future careers, the current shortage of providers (especially in rural areas) may require  
21 the shifting of tasks. Task sharing and task shifting within family planning services is  
22 recommended by World Health Organization (WHO) [26]. The involvement of clinical  
23 officers, midwives and nurses increases equitable access to modern contraception among  
24 women in low resource setting [27]. The fact that one-fourth of our respondents believed that  
25 health workers, rather than physicians, were best suited to dispense contraceptive information  
26 suggests that future doctors would be willing to relegate such tasks to others. This might  
27 overcome the present inequalities in access to reproductive health services in India [28]. A  
28 recent study suggests that the inclusion of nurses, midwives, and ayurvedic physicians in  
29 medical abortion care is feasible in India [29]. Broadening of the provider base for family  
30 planning services would be a pragmatic response to the current shortage especially in rural  
31 area of India. Several studies conclude that even though abortion providers discuss  
32 contraception with their patients and advise them about a range of methods, it is common for  
33 patients to refuse any form of contraception following an abortion [30, 31]. Indian women  
34 have limited power to decide about birth control. The preference for a male child, which still  
35 strongly prevails in India, also has an influence on reproductive behaviour. Reducing such a  
36 preference would require a change in social norms and an improvement in the status of  
37  
38  
39  
40  
41  
42  
43  
44  
45  
46  
47  
48  
49  
50  
51  
52  
53  
54  
55  
56

60

1  
2  
3  
4  
5  
6  
7  
8 women [32]. Two recent studies from rural India may indicate a change in attitude. In the  
9 first, nearly one-third of young married women without children were found to be using  
10 contraceptives; 10% were using condoms to postpone having their first child [23]. The second  
11 study found growing autonomy among young couples in using contraception to space births,  
12 even when this conflicted with the views of their mothers-in-law [33].  
13  
14  
15  
16

17  
18 The quality of provider counselling and patient education is important for the successful  
19 integration of new hormonal methods of contraception into clinical practice [34].  
20 Comprehensive sexual and reproductive health services should conform with international  
21 human rights standards and include respect for privacy and confidentiality, provide full and  
22 accurate information, and ensure free and informed consent [11]. India has one of the most  
23 privatized medical systems in the world. The public system, which provides health care for  
24 the poor, employs only two physicians and eight nurses per 10,000 population [35]. The  
25 strategic use of nurses and midwives has been described to contribute to mitigating human  
26 resource problems in emergency obstetric and gynecological care [36]. There is evidence  
27 from developing countries that trained nurses and midwives can replace doctors in many  
28 settings [37], yet medical doctors are still the dominant providers of contraceptive services in  
29 India. Strategies' identified to cover critical gaps in access to reproductive health are;  
30 integrated family planning with postpartum and abortion care, pre and in service training on  
31 evidence based contraception and task shift and sharing between physicians and midwives  
32 and nurses [38].  
33  
34  
35  
36  
37  
38  
39  
40  
41  
42  
43

#### 44 **METHODOLOGICAL CONSIDERATIONS**

45  
46 One weakness is the non-probability sampling technique applied in our study and this might  
47 reduce the external validity. The large sample size and the fact that a fairly high proportion of  
48 the total number of students in both private (50 %) and public (26%) colleges is included are  
49 thought to strengthen the validity. However, since India is a country with large regional  
50 differences in socioeconomic and health status, our results may not be representative of all  
51 medical interns in the country. On the other hand, the presence of interns from public and  
52  
53  
54  
55  
56

1  
2  
3  
4  
5  
6  
7  
8 private medical schools in both urban and semi-urban settings may strengthen the  
9 generalizability for Maharashtra. The method of using anonymous questionnaires is suitable  
10 for sensitive topics like sexual and reproductive health. The reliability and validity of the  
11 survey is strengthened through previous testing of the instrument.  
12  
13  
14

## 15 **CONCLUSIONS**

16  
17  
18 We have found positive attitudes towards modern contraceptive methods, sex education, and  
19 family planning counselling among future physicians in India. There has also been a  
20 willingness to offer sexual and reproductive health services to people regardless of their  
21 marital status. Pre- and in-service training in evidence-based contraceptive counselling would  
22 decrease unplanned pregnancies and unsafe abortions in India. Expansion of the provider base  
23 to include categories of health care staff other than physicians as purveyors of contraceptive  
24 information could increase access to services.  
25  
26  
27  
28  
29  
30

## 31 **Contributor statement**

32  
33  
34 BE had the original idea of the study and developed the study protocol together with HO,  
35 KGD and MKA, whom developed the original questionnaire. HO entered the data and made  
36 first analysis together with SH who wrote the first draft. All authors contributed to the final  
37 version of the manuscript.  
38  
39  
40  
41

## 42 **Acknowledgements**

43  
44  
45 The study was funded by the Faculty of Medicine, Uppsala University, and Sida (Swedish  
46 International Development Cooperation Agency). The data collection was made under the  
47 cooperation between Uppsala University and Ipas, New Delhi, India.  
48  
49  
50

## 51 **Competing interests**

52  
53  
54 The authors declare no competing interests  
55  
56

## Data sharing statement

There is no additional data available

## REFERENCES

- [1] Ahmed S, Li Q, Liu L, Tsui AO. Maternal deaths averted by contraceptive use: An analysis of 172 countries. *Lancet* 2012;380:111-25.
- [2] Collumbien M, Gerressu M, Cleland J. Non-use and use of ineffective methods of contraception. In: Ezzati M, Lopez AD, Rodgers A, Murray CJL, editors. *Comparative quantification of health risks: Global and regional burden of disease attributable to selected major risk factors*. Geneva: World Health Organization, 2004. p. 1255-320.
- [3] Marston C, Cleland J. Relationships between contraception and abortion: A review of the evidence. *Int Fam Plan Perspect* 2003;29:6-13.
- [4] Oringanje C, Meremikwu MM, Eko H, Esu E, Meremikwu A, Ehiri JE. Interventions for preventing unintended pregnancies among adolescents. *Cochrane Database Syst Rev* 2009:CD005215.
- [5] World Health Organization (WHO). *Unsafe abortion: global and regional estimates of the incidence of unsafe abortion and associated mortality in 2008*. 6th ed. Geneva: WHO, 2011.
- [6] World Health Organization (WHO). *Trends in maternal mortality: 1990 to 2010*. Geneva: WHO, 2012.
- [7] Parliament of India. *Medical termination of pregnancy act (MTP Act), Act No. 34 of 1971*. Revised version. Delhi: Commercial Law Publishers, 2010.
- [8] Jejeebhoy SJ, Zavier AJF, Acharya R, Kalyanwala S. *Increasing access to safe abortion in rural Maharashtra: Outcomes of a comprehensive abortion care model*. New Delhi: Population Council, 2011.
- [9] Zavier AJ, Padmadas SS. Postabortion contraceptive use and method continuation in India. *Int J Gynaecol Obstet* 2012;118:65-70.
- [10] James KS. India's demographic change: opportunities and challenges. *Science* 2011;333:576-80.

- 1  
2  
3  
4  
5  
6  
7  
8 [11] International Institute for Population Sciences (IIPS) and Macro International. National  
9 family health survey (NFHS-3), 2005-06: India. Volume 1. Mumbai: IIPS, 2007.  
10  
11 [12] Cottingham J, Germain A, Hunt P. Use of human rights to meet the unmet need for  
12 family planning. *Lancet* 2012;380:172-80.  
13  
14 [13] Koenig MA. The impact of quality of care on contraceptive use: Evidence from  
15 longitudinal data from rural Bangladesh. Baltimore: Johns Hopkins University, 2003.  
16  
17 [14] Curtis S, Evens E, Sambisa W. Contraceptive discontinuation and unintended pregnancy:  
18 An imperfect relationship. *Int Perspect Sex Reprod Health* 2011;37:58-66.  
19  
20 [15] Klingberg-Allvin M, Van Tam V, Nga NT, Ransjo-Arvidson A-B, Johansson A. Ethics  
21 of justice and ethics of care. Values and attitudes among midwifery students on adolescent  
22 sexuality and abortion in Vietnam and their implications for midwifery education: A survey  
23 by questionnaire and interview. *Int J Nurs Stud* 2007;44:37-46.  
24  
25 [16] Government of India, Ministry of Home Affairs. Census of India 2011.  
26 <<http://www.censusindia.gov.in/default.aspx>> Accessed 20/08/2012  
27  
28 [17] Supe A, Burdick WP. Challenges and issues in medical education in India. *Acad Med*  
29 2006;81:1076-80.  
30  
31 [18] Spector PE. Summated rating scale construction. Sage University Paper Series on:  
32 Quantitative applications in the social sciences no 82. Newbury Park, CA: Sage, 1992.  
33  
34 [19] Steinauer JE, Turk JK, Fulton MC, Simonson KH, Landy U. The benefits of family  
35 planning training: a 10-year review of the Ryan Residency Training Program. *Contraception*.  
36 2013 Feb 24: S0010-7824  
37  
38 [20] Nath A: HIV/AIDS and Indian youth—a review of the literature (1980-2008). *SAHARA*  
39 *J* 2009;6:2-8.  
40  
41 [21] Kirby DB, Laris BA, Rolleri LA. Sex and HIV education programs: Their impact on  
42 sexual behaviors of young people throughout the world. *J Adolesc Health* 2007;40:206-17.  
43  
44 [22] Benzaken T, Palep AH, Gill PS. Exposure to and opinions toward sex education among  
45 adolescent students in Mumbai: A cross-sectional survey. *BMC Public Health* 2011;11:805.  
46  
47 [23] Collumbien M, Mishra M, Blackmore C. Youth-friendly services in two rural districts of  
48 West Bengal and Jharkhand, India: Definite progress, a long way to go. *Reprod Health*  
49 *Matters* 2011;19:174-83.  
50  
51  
52  
53  
54  
55  
56  
57  
58  
59  
60



- 1  
2  
3  
4  
5  
6  
7  
8 [24] Brown SS, Burdette L, Rodriguez P. Looking inward: Provider-based barriers to  
9 contraception among teens and young adults. *Contraception* 2008;78:355-7.  
10
- 11 [25] Campbell M, Sahin-Hodoglugil NN, Potts M. Barriers to fertility regulation: A review of  
12 the literature. *Stud Fam Plann* 2006;37(2):87-98.  
13
- 14 [26] Mbizvo MT, Chou D, Shaw D. Today's evidence, tomorrow's agenda: implementation of  
15 strategies to improve global reproductive health. *Int J Gynaecol Obstet*. 2013 May;121 Suppl  
16 1:S3-8.  
17
- 18 [27] Jacobstein R, Curtis C, Spieler J, Radloff S. Meeting the need for modern contraception:  
19 effective solutions to a pressing global challenge. *Int J Gynaecol Obstet*. 2013 May;121 Suppl  
20 1:S9-15.  
21
- 22 [29] Krupp K, Madhivanan P. Leveraging human capital to reduce maternal mortality in  
23 India: Enhanced public health system or public-private partnership? *Hum Resour Health*  
24 2009;7:18.  
25
- 26 [30] Jejeebhoy SJ, Kalyanwala S, Mundle S, et al. Feasibility of expanding the medication  
27 abortion provider base in India to include ayurvedic physicians and nurses. *Int Perspect Sex*  
28 *Reprod Health* 2012;38:133-42.  
29
- 30 [31] Acharya R, Kalyanwala S. Knowledge, attitudes, and practices of certified providers of  
31 medical abortion: Evidence from Bihar and Maharashtra, India. *Int J Gynaecol Obstet*  
32 2012;118 Suppl 1:S40-6.  
33
- 34 [32] Jayaraman A, Mishra V, Arnold F. The relationship of family size and composition to  
35 fertility desires, contraceptive adoption and method choice in South Asia. *Int Perspect Sex*  
36 *Reprod Health* 2009;35:29-38.  
37
- 38 [33] Char A, Saavala M, Kulmala T. Influence of mothers-in-law on young couples' family  
39 planning decisions in rural India. *Reprod Health Matters* 2010;18:154-162.  
40
- 41 [34] Harper CC, Brown BA, Foster-Rosales A, Raine TR. Hormonal contraceptive method  
42 choice among young, low-income women: How important is the provider? *Patient Educ*  
43 *Counsel* 2010;81:349-54.  
44
- 45 [35] World Health Organization (WHO). Country health system profile: India. Geneva:  
46 WHO, 2008.  
47
- 48 [36] Gessesew A, Barnabas GA, Prata N, Weidert K. Task shifting and sharing in Tigray,  
49 Ethiopia, to achieve comprehensive emergency obstetric care. *Int J Gynaecol Obstet*,  
50 2011;113; 28-31.  
51  
52  
53  
54  
55  
56  
57  
58  
59  
60



1  
2  
3  
4  
5  
6  
7  
8 [37] Pereira C, Mbaruku G, Nzabuhakwa C, Bergström S, McCord C Emergency obstetric  
9 surgery by non-physician clinicians in Tanzania. *Int J Gynaecol Obstet*. 2011  
10 Aug;114(2):180-3.  
11

12 [38].Culwell KR, Vekemans M, de Silva U, Hurwitz M, Crane BB.Critical gaps in universal  
13 access to reproductive health: contraception and prevention of unsafe abortion. *Int J Gynaecol*  
14 *Obstet*. 2010 Jul;110 Suppl:S13-6.  
15  
16  
17  
18  
19  
20  
21  
22  
23  
24  
25  
26  
27  
28  
29  
30  
31  
32  
33  
34  
35  
36  
37  
38  
39  
40  
41  
42  
43  
44  
45  
46  
47  
48  
49  
50  
51  
52  
53  
54  
55  
56  
57  
58  
59  
60

Journal of  
**FAMILY PLANNING &  
 REPRODUCTIVE HEALTH CARE**

**Future physicians' knowledge, attitudes, and perceptions on  
 contraceptive use and counselling: a cross-sectional survey  
 among medical interns in Maharashtra, India**

|                               |                                                                                                                                                                                                                                                                                                                                                                                                                                                                                      |
|-------------------------------|--------------------------------------------------------------------------------------------------------------------------------------------------------------------------------------------------------------------------------------------------------------------------------------------------------------------------------------------------------------------------------------------------------------------------------------------------------------------------------------|
| Journal:                      | <i>Journal of Family Planning and Reproductive Health Care</i>                                                                                                                                                                                                                                                                                                                                                                                                                       |
| Manuscript ID:                | jfprhc-2013-100607.R1                                                                                                                                                                                                                                                                                                                                                                                                                                                                |
| Article Type:                 | Article                                                                                                                                                                                                                                                                                                                                                                                                                                                                              |
| Date Submitted by the Author: | 22-May-2013                                                                                                                                                                                                                                                                                                                                                                                                                                                                          |
| Complete List of Authors:     | Hogmark, Sara; Uppsala University, Womens and Childrens Health; Falu County Hospital, Obstetrics and Gynaecology<br>klingberg-allvin, marie; Uppsala University, Womens and Childrens Health;<br>Dalarna University, School of Social and Health Science<br>Gemzell-Danielsson, Kristina; Karolinska Institutet, Womens and Childrens Health<br>Ohlsson, Hannes; Uppsala University, Womens and Childrens Health<br>Essen, Birgitta; Uppsala University, Womens and Childrens Health |
| Keywords:                     | education and training, family planning service provision, oral contraceptives, surveys                                                                                                                                                                                                                                                                                                                                                                                              |

SCHOLARONE™  
 Manuscripts

1

2  
3  
4  
5  
6  
7  
8  
9  
10  
11  
12  
13  
14  
15  
16  
17  
18  
19  
20  
21  
22  
23  
24  
25  
26  
27  
28  
29  
30  
31  
32  
33  
34  
35  
36  
37  
38  
39  
40  
41  
42  
43  
44  
45  
46  
47  
48  
49  
50  
51  
52  
53  
54  
55  
56  
57  
58  
59  
60

Future physicians' knowledge, attitudes, and perceptions on contraceptive use and counselling: a cross-sectional survey among medical interns in Maharashtra, India

Sara Hogmark, MD, Dept. of Obstetrics and Gynaecology, Falu County Hospital, Falun, Sweden; Dept. of Women's and Children's Health (IMCH), Uppsala University, Sweden

Marie Klingberg-Allvin, Senior Lecturer, Dept. of Women's and Children's Health, Uppsala University; Dept. of Women's and Children's Health, Karolinska Institutet; School of Social and Health Science, Dalarna University, Sweden

Hannes Ohlsson, MD, Dept. of Women's and Children's Health (IMCH), Uppsala University, Sweden

Kristina Gemzell-Danielsson, Professor, Dept. of Women's and Children's Health, Karolinska Institutet, Sweden

Birgitta Essén, Asst. Prof., Dept. of Women's and Children's Health (IMCH), Uppsala University, Sweden

Corresponding Author:

Sara Hogmark, Dept. of Obstetrics and Gynaecology, Falu County Hospital, 79182 Falun, Sweden

Phone: 046-(0)23-492000 E-mail: [sara.hogmark@ltdalarna.se](mailto:sara.hogmark@ltdalarna.se)

Word count: 2861 (excluding abstract and references)

2

## ABSTRACT

*Background:* Considerable global maternal mortality and morbidity could be avoided through the use of effective contraception. In India, contraception services are frequently unavailable or there are obstacles to obtaining modern, reversible contraceptives. This study aimed to investigate knowledge and perceptions on contraceptive use and counselling among future physicians in Maharashtra, India.

*Study design:* A cross-sectional descriptive study using a self-administered questionnaire was conducted among 1996 medical interns in their fifth year of study at 27 medical colleges in the state of Maharashtra, India. Descriptive and analytical statistics interpreted the survey instrument and significant results were presented with a 95% confidence interval.

*Results:* Respondents expressed the desire to provide contraceptive services and individual counselling. They had a fair knowledge of contraception, but showed some misconceptions about modern methods and the impact of sex education. Attitudes towards contraception were positive, pre-marital counselling was supported, and the influence of traditional values and negative provider attitudes on services was recognized. Gender, area of upbringing, and type of medical college did not change the results.

*Conclusions:* Pre- and in-service training of providers in evidence-based contraceptive counselling would decrease unplanned pregnancies and reduce unsafe abortions in the region studied. Expanding the provider base to health care professionals other than physicians would increase the availability of services.

Keywords: contraceptives, medical students, India, reproductive health

3

**Key message points**

- Despite positive attitudes towards modern contraceptives, sex education, and family planning counselling, future physicians in Maharashtra have fair knowledge and misconceptions about modern contraceptives.
- Future physicians expressed a desire to provide sexual and reproductive health services to people regardless of their marital status.
- Pre- and in-service training in evidence-based contraceptive counselling should be implemented in order to decrease unplanned pregnancies and unsafe abortions in India.

## INTRODUCTION

4

1  
2  
3  
4  
5  
6  
7  
8  
9  
10  
11  
12  
13  
14  
15  
16  
17  
18  
19  
20  
21  
22  
23  
24  
25  
26  
27  
28  
29  
30  
31  
32  
33  
34  
35  
36  
37  
38  
39  
40  
41  
42  
43  
44  
45  
46  
47  
48  
49  
50  
51  
52  
53  
54  
55  
56  
57  
58  
59  
60

Contraceptive use is an effective primary prevention strategy for reducing maternal mortality [1]. It has been estimated that the use of effective contraception could avert 90% of abortion-related and more than 20% of obstetric-related mortality globally [2]. Abortion incidence is inversely associated with the level of contraceptive use, especially where fertility rates are stable [3]. In addition, comprehensive sex education has the potential to prevent unintended pregnancies that lead to unsafe abortions [4]. The growing number of people of reproductive age in developing countries poses a challenge for family planning programmes and health care services. In order to meet the increasing demand for contraceptives and ensure the sexual and reproductive health and rights of women, including the right to planned parenthood, intensified efforts are urgently needed [5].

India accounts for 20% of maternal deaths worldwide. Every year, nearly 60,000 women in India die from complications related to pregnancy [6]. Approximately 6.7 million induced abortions take place in India annually. Despite the fact that induced abortion has been legal in India since 1971 [7], most abortions are performed in an unsafe manner and put women's health and lives at risk [8]. Moreover, a recent study concluded that 70% of all Indian women who have an abortion do not use post-abortion contraception [9]. The unmet need for family planning among married women is 14%. The overall unmet need for modern contraceptives is 22% in the cities and higher in rural areas. Among married women in India, 56% use some form of contraception and 49% use a modern method. Female sterilization is the most common contraceptive practice and accounts for 75% of all methods used [10]. The use of reversible, modern methods in order to postpone birth of a first child or for spacing births is

5

1  
2  
3  
4  
5  
6  
7  
8  
9  
10  
11  
12  
13  
14  
15  
16  
17  
18  
19  
20  
21  
22  
23  
24  
25  
26  
27  
28  
29  
30  
31  
32  
33  
34  
35  
36  
37  
38  
39  
40  
41  
42  
43  
44  
45  
46  
47  
48  
49  
50  
51  
52  
53  
54  
55  
56  
57  
58  
59  
60

infrequent: male condoms are used by 5%, the pill 3%, IUD 2%, injection 1%, and male sterilisation 1% [11].

Some of the barriers that impede women's access to contraception are health care providers who are inadequately trained, insufficient in number, and poorly supervised [12]. Studies have shown that improving quality of care increases and sustains contraceptive use by women [13]. Providers need adequate knowledge of contraceptive methods and training in counselling skills in order to provide reliable information to women to avoid unintended pregnancy [14]. Despite the availability of effective methods of contraception in India, many pregnancies remain unplanned and unintended. Considering the future role of medical students and interns as contraceptive counsellors, little is known about their views on contraceptive methods, use or counselling. This study aimed to investigate knowledge and perceptions on contraceptive use and counselling among future physicians in Maharashtra, India.

## MATERIALS AND METHODS

In February 2011, a cross-sectional survey was conducted using a pre-tested, self-administered questionnaire in the Indian state of Maharashtra among 1996 medical students in their fifth year (internship) of training [15]. Their colleges had opted to take part in a one-day training session on comprehensive abortion care at the invitation of a non-governmental organization. In the case of public colleges, the state government made this decision. All medical interns at the selected institutions were asked to participate before they were to take a

6

pre-service CAC orientation programme. Questionnaires were distributed before the first lecture of the program. In the State of Maharashtra out of 43 medical colleges (5195 students) 19 are Public (2200 students). In total 27 colleges (8 public, 19 private) were included in the study and 1423 and 573 students participated from private and public colleges respectively.

#### Study setting

Maharashtra is located in west-central India. It is the country's second most populous state and the third largest by area. Of its 112 million inhabitants, a slight majority live in rural areas. Mumbai, India's largest city, is the capital of the state. Maharashtra's socio-economic status, literacy rate, and health infrastructure are better than the national average [16].

Medical education in India is regulated by the Medical Council of India and is either public or private. Medical education consists of 4.5 years of theoretical studies followed by one year of internship, which includes a two-month rotation in obstetrics/gynaecology and three months of community medicine [17].

#### Instrument

The questionnaire contained three sections. Section 1 included socio-demographic characteristics as gender, age, religion, marital status, place of birth/area of upbringing, and type of college. Section 2 included questions related to the medical curriculum and questions concerning perceptions of contraceptive methods and services.

Section 3 consisted of twelve statements on different aspects of contraceptive methods, services, and values surrounding sexual and reproductive health. Participants were asked to circle the most appropriate alternative on a five-point Likert scale (Disagree completely/Disagree/Neither agree nor disagree/Agree/Agree completely) [18].



7

### Statistical analysis

Questionnaires that contained one or more answers were included in the analysis. Statistical Package for Social Studies (SPSS) 20.0 software was used. Descriptive statistics were applied to all sections of the questionnaire; actual numbers and proportions were calculated; and cross-tabulations with intergroup comparisons of answers were made for interns of different genders, types of colleges, and places of birth. The alternatives 'agree' and 'agree completely' were aggregated, as well as the alternatives 'disagree' and 'disagree completely'. Any difference with a 95% confidence interval (CI) was regarded as significant.

### Ethical considerations

The study was carried out in compliance with the principles of the World Medical Association Declaration of Helsinki. The medical interns eligible for participation in the study were given oral information about the study and were informed that participation was anonymous and voluntary and that choosing not to participate would not affect their studies or future careers negatively. By filling in the questionnaire written consent to participation was given. Permission to conduct the survey in connection with the training programme was obtained from the principal at each college. The study has been approved by the research ethical committee at Karolinska Institutet (Dnr: 2013/415-31/4).

### RESULTS

Out of 2,006 questionnaires, 1,996 were at least partially filled-in, making the overall response rate 99.5%. The demographic characteristics of the interns are outlined in Table 1. Since the interns were homogenous in terms of age, religion, and marital status, the variables

8

1  
2  
3  
4  
5  
6  
7  
8  
9  
10  
11  
12  
13  
14  
15  
16  
17  
18  
19  
20  
21  
22  
23  
24  
25  
26  
27  
28  
29  
30  
31  
32  
33  
34  
35  
36  
37  
38  
39  
40  
41  
42  
43  
44  
45  
46  
47  
48  
49  
50  
51  
52  
53  
54  
55  
56  
57  
58  
59  
60

remaining for inter-group comparisons were gender (57% male, 43% female), place of birth (72% urban, 25% rural), and type of college.

Table two is not showing the course work, but interns perceptions on coursework, their own assessment of their knowledge and their clinical practice.

Table 2 shows the respondents' coursework on sexual and reproductive health. Most of the interns thought that the topic of reproductive health had been adequately covered in their curriculum, including contraceptive methods. A majority considered their theoretical knowledge in sexual and reproductive health fair or good. A large proportion reported having had no clinical practice in abortion care services during their training. A comparison between interns from private and public colleges revealed no significant differences.

With regard to contraceptive counselling, 74% believed it should be given individually and not in a group. A majority of the respondents (67%) thought doctors should be the ones to provide contraception to patients, while 27% considered health workers to be the most appropriate counsellors. A few interns chose other alternatives (nurse 3%, other 1%, missing 1%). A majority (95%) indicated they would like to have responsibility for providing information on contraception as future doctors. Regarding the use of oral contraceptives, 89% of the interns stated they should be taken every day. Some interns (6%) thought they were to be taken after intercourse or once a month (3%). A cross-sectional comparison by interns with rural versus urban places of birth revealed no significant differences with regard to contraceptive counselling. However, those from private colleges were more supportive of individual contraceptive counselling over group counselling (private college interns 78%, CI 95%, 75.9–80.3; public college interns 71%, CI 95%, 66.6–74.4). Female interns were also more supportive of individual counselling than males (females 80%, CI 95%, 77.4–82.9;

What do you mean by health worker?

what about cancelling

inconsistency of reporting. please use one decimal place for all your percentages throughout the manuscript

9

1  
2  
3  
4  
5  
6  
7  
8  
9  
10  
11  
12  
13  
14  
15  
16  
17  
18  
19  
20  
21  
22  
23  
24  
25  
26  
27  
28  
29  
30  
31  
32  
33  
34  
35  
36  
37  
38  
39  
40  
41  
42  
43  
44  
45  
46  
47  
48  
49  
50  
51  
52  
53  
54  
55  
56  
57  
58  
59  
60

males 73%, CI 95%, 70.1–75.4). Females also expressed a greater interest in having responsibility for providing contraceptive information as future doctors than males (females 98%, CI 95%, 96.8–98.8; males 95% CI, 93.8–96.4). Moreover, female interns were better informed on the daily intake of oral contraceptive pills than males (females 93%, CI 95%, 91.5–94.9; males 89%, CI 95%, 86.8–90.6).

The knowledge, attitudes, and perceptions of medical interns on contraceptive services, and values surrounding sexual and reproductive health are shown in Table 3. Cross-sectional analysis comparing interns from public and private colleges indicated a difference of opinion regarding the statement “Doctors working in abortion service have friendly attitudes towards unmarried women”. Fewer interns from private colleges agreed or agreed completely as compared to interns from public colleges (private college interns 44%, CI 95%, 41.8–46.4; public college interns 51%, CI 95%, 47.0–51.4).

A comparison of the answers based on urban or rural) revealed significant differences in response. Contraceptive pills might cause cancer”; “Doctors working in abortion service have friendly attitudes towards unmarried women”; and “Sex education encourages unmarried people to have sex” (Table 4).

Table 5 compares male and female medical interns’ knowledge, attitudes, and perceptions on contraception. More female interns agreed or agreed completely that contraceptive pills might cause cancer. Males tended to believe that emergency contraceptive pills may be used several times a month. Both male and female interns largely agreed or agreed completely that

Why do you use a table for this and not for the above statement?

what is the significance ? who is having more negative attitudes?

10

1  
2  
3  
4  
5  
6  
7  
8  
9  
10  
11  
12  
13  
14  
15  
16  
17  
18  
19  
20  
21  
22  
23  
24  
25  
26  
27  
28  
29  
30  
31  
32  
33  
34  
35  
36  
37  
38  
39  
40  
41  
42  
43  
44  
45  
46  
47  
48  
49  
50  
51  
52  
53  
54  
55  
56  
57  
58  
59  
60

condoms protect against sexually transmitted diseases (STD) and HIV, although females were significantly more supportive of their use. One in five males versus one in ten females agreed or agreed completely that sex education encourages unmarried people to have sex. Among males, 50% agreed or agreed completely that doctors working in abortion services have friendly attitudes towards unmarried women, compared to 30% of females.

I do not agree that they have fair knowledge when 11% of interns are unaware that OCP should be taken everyday!!!!

## DISCUSSION

Our findings suggest that although the medical interns surveyed had a fair knowledge and a positive attitude toward contraception and pre-marital counselling, they also had misconceptions about modern contraceptive methods and the impact of sex education. They recognized the influence of traditional values and negative provider attitudes regarding contraceptive services, and they expressed a clear interest in disseminating contraceptive information as future physicians.

Very few respondents had had any clinical experience in abortion care services, yet a majority thought the topics of sexual and reproductive health and contraceptive methods had been adequately covered in their coursework. Still, nearly one in five interns falsely believed that contraceptive pills can cause infertility. More females than males were unaware that emergency contraceptive pills may be used several times a month. Recent studies indicate that family planning training during residency improve future physicians proficiency in both uterine evacuation and contraceptive counselling[19].

Our findings did not reveal any differences in self-rated or theoretical knowledge between public and private college interns. The background factor that had the greatest influence on

1  
2  
3  
4  
5  
6  
7  
8  
9 knowledge was gender. Female interns were better informed about the dosage of oral  
10  
11 contraceptives and the protection that condoms offer against STD/HIV. They also report that  
12  
13 sex education does not encourage unmarried people to have sex. Regardless of demographic  
14  
15 background, most interns in our study recognized that traditional values are barriers to sex  
16  
17 education. Few thought contraceptive information should only be provided to married  
18  
19 couples, although interns born in rural areas had more negative perceptions of sex education.  
20  
21 The socio-cultural norms of Indian society contribute to making sex-related issues taboo and  
22  
23 hinder young people from seeking counselling regarding sexual health. At the same time,  
24  
25 premarital sex is increasing among Indian youth [20]. Although comprehensive sex education  
26  
27 has been shown to have a positive impact on young people's risky sexual behaviour [21], in  
28  
29 parts of India sex education has been banned in schools [20]. Young people in India have  
30  
31 expressed a desire for formal sex education and doctors are their preferred source of advice  
32  
33 [22]. India is known to have negative attitudes toward pre-marital sex and a reluctance to  
34  
35 provide married couples with contraceptives before they have had at least one child [23].  
36  
37 Other research reveals that health care providers often impose unnecessary barriers in  
38  
39 dispensing contraceptives, including denial of a contraceptive method on the basis of age,  
40  
41 parity, marital status, or lack of parental or spousal authorization [24]. A review of studies  
42  
43 from developing countries indicates a similar pattern [25]. One in four respondents in our  
44  
45 study did not believe doctors working in abortion services held positive attitudes towards  
46  
47 unmarried women. However, as noted above, most interns supported providing contraceptive  
48  
49 information to unmarried couples. Females expressed a slightly greater interest in working  
50  
51 with contraceptive services in their medical practice than males. Although nearly all interns  
52  
53 in our survey said they would like to assume the responsibility for contraceptive counselling  
54  
55  
56  
57  
58  
59  
60

1  
2  
3  
4  
5  
6  
7  
8  
9  
10  
11  
12  
13  
14  
15  
16  
17  
18  
19  
20  
21  
22  
23  
24  
25  
26  
27  
28  
29  
30  
31  
32  
33  
34  
35  
36  
37  
38  
39  
40  
41  
42  
43  
44  
45  
46  
47  
48  
49  
50  
51  
52  
53  
54  
55  
56  
57  
58  
59  
60

in their future careers, the current shortage of providers (especially in rural areas) may require the shifting of tasks. Task sharing and task shifting within family planning services is recommended by World Health Organization (WHO) [26]. The involvement of clinical officers, midwives and nurses increases equitable access to modern contraception among women in low resource setting [27]. The fact that one-fourth of our respondents believed that health workers, rather than physicians, were best suited to dispense contraceptive information suggests that future doctors would be willing to relegate such tasks to others. This might overcome the present inequalities in access to reproductive health services in India [28]. A recent study suggests that the inclusion of nurses, midwives, and ayurvedic physicians in medical abortion care is feasible in India [29]. Broadening of the provider base for family planning services would be a pragmatic response to the current shortage especially in rural area of India.

Several studies conclude that even though abortion providers discuss contraception with their patients and advise them about a range of methods, it is common for patients to refuse any form of contraception following an abortion [30, 31]. Indian women have limited power to decide about birth control. The preference for a male child, which still strongly prevails in India, also has an influence on reproductive behaviour. Reducing such a preference would require a change in social norms and an improvement in the status of women [32]. Two recent studies from rural India may indicate a change in attitude. In the first, nearly one-third of young married women without children were found to be using contraceptives; 10% were using condoms to postpone having their first child [23]. The second study found growing

1  
2  
3  
4  
5  
6  
7  
8  
9  
10  
11  
12  
13  
14  
15  
16  
17  
18  
19  
20  
21  
22  
23  
24  
25  
26  
27  
28  
29  
30  
31  
32  
33  
34  
35  
36  
37  
38  
39  
40  
41  
42  
43  
44  
45  
46  
47  
48  
49  
50  
51  
52  
53  
54  
55  
56  
57  
58  
59  
60

autonomy among young couples in using contraception to space births, even when this conflicted with the views of their mothers-in-law [33].

The quality of provider counselling and patient education is important for the successful integration of new hormonal methods of contraception into clinical practice [34].

Comprehensive sexual and reproductive health services should conform with international human rights standards and include respect for privacy and confidentiality, provide full and accurate information, and ensure free and informed consent [11]. India has one of the most privatized medical systems in the world. The public system, which provides health care for the poor, employs only two physicians and eight nurses per 10,000 population [35]. The strategic use of nurses and midwives has been described to contribute to mitigating human resource problems in emergency obstetric and gynecological care [36]. There is evidence from developing countries that trained nurses and midwives can replace doctors in many settings [37], yet medical doctors are still the dominant providers of contraceptive services in India. Strategies identified to cover critical gaps in access to reproductive health are; integrated family planning with postpartum and abortion care, pre and in service training on evidence based contraception and task shift and sharing between physicians and midwives and nurses [38].

#### METHODOLOGICAL CONSIDERATIONS

One weakness is the non-probability sampling technique applied in our study and this might reduce the external validity. The large sample size and the fact that a fairly high proportion of the total number of students in both private (50 %) and public (26%) colleges is included are



14

1  
2  
3  
4  
5  
6  
7  
8  
9  
10  
11  
12  
13  
14  
15  
16  
17  
18  
19  
20  
21  
22  
23  
24  
25  
26  
27  
28  
29  
30  
31  
32  
33  
34  
35  
36  
37  
38  
39  
40  
41  
42  
43  
44  
45  
46  
47  
48  
49  
50  
51  
52  
53  
54  
55  
56  
57  
58  
59  
60

thought to strengthen the validity. However, since India is a country with large regional differences in socioeconomic and health status, our results may not be representative of all medical interns in the country. On the other hand, the presence of interns from public and private medical schools in both urban and semi-urban settings may strengthen the generalizability for Maharashtra. The method of using anonymous questionnaires is suitable for sensitive topics like sexual and reproductive health. The reliability and validity of the survey is strengthened through previous testing of the instrument.

## CONCLUSIONS

We have found positive attitudes towards contraceptive methods, sex education, and family planning counselling. There has been a willingness to use contraceptives, their marital status would decrease, base to increase contraceptive use.

I think this conclusion underestimates medical training. We do not want medical practitioners with myths and poor attitudes. Considerable number of interns in this sample have poor attitudes and myths related to contraceptives, which is unacceptable for medical practitioners. I agree with this statement if this was done among lay people or healthcare workers. I wonder whether this level of myths are acceptable among medical practitioners in Sweden? Lay people might be different in developed and developing countries, but all medical

## Acknowledgements

The study was funded by the Faculty of Medicine, Uppsala University, and Sida (Swedish International Development Cooperation Agency). The data collection was made under the cooperation between Uppsala University and Ipas, New Delhi, India.

## Competing interests

The authors declare no competing interests



## REFERENCES

- [1] Ahmed S, Li Q, Liu L, Tsui AO. Maternal deaths averted by contraceptive use: An analysis of 172 countries. *Lancet* 2012;380:111-25.
- [2] Collumbien M, Gerressu M, Cleland J. Non-use and use of ineffective methods of contraception. In: Ezzati M, Lopez AD, Rodgers A, Murray CJL, editors. *Comparative quantification of health risks: Global and regional burden of disease attributable to selected major risk factors*. Geneva: World Health Organization, 2004. p. 1255-320.
- [3] Marston C, Cleland J. Relationships between contraception and abortion: A review of the evidence. *Int Fam Plan Perspect* 2003;29:6-13.
- [4] Oringanje C, Meremikwu MM, Eko H, Esu E, Meremikwu A, Ehiri JE. Interventions for preventing unintended pregnancies among adolescents. *Cochrane Database Syst Rev* 2009:CD005215.
- [5] World Health Organization (WHO). *Unsafe abortion: global and regional estimates of the incidence of unsafe abortion and associated mortality in 2008*. 6th ed. Geneva: WHO, 2011.
- [6] World Health Organization (WHO). *Trends in maternal mortality: 1990 to 2010*. Geneva: WHO, 2012.
- [7] Parliament of India. *Medical termination of pregnancy act (MTP Act), Act No. 34 of 1971*. Revised version. Delhi: Commercial Law Publishers, 2010.
- [8] Jejeebhoy SJ, Zavier AJF, Acharya R, Kalyanwala S. *Increasing access to safe abortion in rural Maharashtra: Outcomes of a comprehensive abortion care model*. New Delhi: Population Council, 2011.
- [9] Zavier AJ, Padmadas SS. Postabortion contraceptive use and method continuation in India. *Int J Gynaecol Obstet* 2012;118:65-70.
- [10] James KS. India's demographic change: opportunities and challenges. *Science* 2011;333:576-80.
- [11] International Institute for Population Sciences (IIPS) and Macro International. *National family health survey (NFHS-3), 2005-06: India. Volume 1*. Mumbai: IIPS, 2007.

- 1  
2  
3  
4  
5  
6  
7  
8  
9 [12] Cottingham J, Germain A, Hunt P. Use of human rights to meet the unmet need for  
10 family planning. *Lancet* 2012;380:172-80.
- 11  
12 [13] Koenig MA. The impact of quality of care on contraceptive use: Evidence from  
13 longitudinal data from rural Bangladesh. Baltimore: Johns Hopkins University, 2003.
- 14  
15 [14] Curtis S, Evens E, Sambisa W. Contraceptive discontinuation and unintended  
16 pregnancy: An imperfect relationship. *Int Perspect Sex Reprod Health* 2011;37:58-66.
- 17  
18 [15] Klingberg-Allvin M, Van Tam V, Nga NT, Ransjo-Arvidson A-B, Johansson A. Ethics  
19 of justice and ethics of care. Values and attitudes among midwifery students on adolescent  
20 sexuality and abortion in Vietnam and their implications for midwifery education: A survey  
21 by questionnaire and interview. *Int J Nurs Stud* 2007;44:37-46.
- 22  
23 [16] Government of India, Ministry of Home Affairs. Census of India 2011.  
24 <<http://www.censusindia.gov.in/default.aspx>> Accessed 20/08/2012
- 25  
26 [17] Supe A, Burdick WP. Challenges and issues in medical education in India. *Acad Med*  
27 2006;81:1076-80.
- 28  
29 [18] Spector PE. Summated rating scale construction. Sage University Paper Series on:  
30 Quantitative applications in the social sciences no 82. Newbury Park, CA: Sage, 1992.
- 31  
32 [19] Steinauer JE, Turk JK, Fulton MC, Simonson KH, Landy U. The benefits of family  
33 planning training: a 10-year review of the Ryan Residency Training Program. *Contraception*.  
34 2013 Feb 24: S0010-7824
- 35  
36 [20] Nath A: HIV/AIDS and Indian youth—a review of the literature (1980-2008).  
37 SAHARA J 2009;6:2-8.
- 38  
39 [21] Kirby DB, Laris BA, Rolleri LA. Sex and HIV education programs: Their impact on  
40 sexual behaviors of young people throughout the world. *J Adolesc Health* 2007;40:206-17.
- 41  
42 [22] Benzaken T, Palep AH, Gill PS. Exposure to and opinions toward sex education among  
43 adolescent students in Mumbai: A cross-sectional survey. *BMC Public Health* 2011;11:805.
- 44  
45 [23] Collumbien M, Mishra M, Blackmore C. Youth-friendly services in two rural districts of  
46 West Bengal and Jharkhand, India: Definite progress, a long way to go. *Reprod Health*  
47 *Matters* 2011;19:174-83.
- 48  
49 [24] Brown SS, Burdette L, Rodriguez P. Looking inward: Provider-based barriers to  
50 contraception among teens and young adults. *Contraception* 2008;78:355-7.
- 51  
52 [25] Campbell M, Sahin-Hodoglugil NN, Potts M. Barriers to fertility regulation: A review of  
53 the literature. *Stud Fam Plann* 2006;37(2):87-98.
- 54  
55  
56  
57  
58  
59  
60

[26] Mbitzo MT, Chou D, Shaw D. Today's evidence, tomorrow's agenda: implementation of strategies to improve global reproductive health. *Int J Gynaecol Obstet*. 2013 May;121 Suppl 1:S3-8.

[27] Jacobstein R, Curtis C, Spieler J, Radloff S. Meeting the need for modern contraception: effective solutions to a pressing global challenge. *Int J Gynaecol Obstet*. 2013 May;121 Suppl 1:S9-15.

[29] Krupp K, Madhivanan P. Leveraging human capital to reduce maternal mortality in India: Enhanced public health system or public-private partnership? *Hum Resour Health* 2009;7:18.

[30] Jejeebhoy SJ, Kalyanwala S, Mundle S, et al. Feasibility of expanding the medication abortion provider base in India to include ayurvedic physicians and nurses. *Int Perspect Sex Reprod Health* 2012;38:133-42.

[31] Acharya R, Kalyanwala S. Knowledge, attitudes, and practices of certified providers of medical abortion: Evidence from Bihar and Maharashtra, India. *Int J Gynaecol Obstet* 2012;118 Suppl 1:S40-6.

[32] Jayaraman A, Mishra V, Arnold F. The relationship of family size and composition to fertility desires, contraceptive adoption and method choice in South Asia. *Int Perspect Sex Reprod Health* 2009;35:29-38.

[33] Char A, Saavala M, Kulmala T. Influence of mothers-in-law on young couples' family planning decisions in rural India. *Reprod Health Matters* 2010;18:154-162.

[34] Harper CC, Brown BA, Foster-Rosales A, Raine TR. Hormonal contraceptive method choice among young, low-income women: How important is the provider? *Patient Educ Counsel* 2010;81:349-54.

[35] World Health Organization (WHO). Country health system profile: India. Geneva: WHO, 2008.

[36] Gessesew A, Barnabas GA, Prata N, Weidert K. Task shifting and sharing in Tigray, Ethiopia, to achieve comprehensive emergency obstetric care. *Int J Gynaecol Obstet*, 2011;113; 28-31.

[37] Pereira C, Mbaruku G, Nzabuhakwa C, Bergström S, McCord C. Emergency obstetric surgery by non-physician clinicians in Tanzania. *Int J Gynaecol Obstet*. 2011 Aug;114(2):180-3.

[38].Culwell KR, Vekemans M, de Silva U, Hurwitz M, Crane BB. Critical gaps in universal access to reproductive health: contraception and prevention of unsafe abortion. *Int J Gynaecol Obstet*. 2010 Jul;110 Suppl:S13-6.

1  
2  
3  
4  
5  
6  
7  
8  
9  
10  
11  
12  
13  
14  
15  
16  
17  
18  
19  
20  
21  
22  
23  
24  
25  
26  
27  
28  
29  
30  
31  
32  
33  
34  
35  
36  
37  
38  
39  
40  
41  
42  
43  
44  
45  
46  
47  
48  
49  
50  
51  
52  
53  
54  
55  
56  
57  
58  
59  
60

Confidential Peer Review Only

Table 1. Demographics for medical interns in Maharashtra, India, 2011 (n = 1996). Data from 27 medical colleges (8 public, 19 private).

| Variable                         | n    | %    |
|----------------------------------|------|------|
| <b>Age</b>                       |      |      |
| 20–24                            | 1886 | 94.4 |
| 25 and above                     | 98   | 5.0  |
| Data missing                     | 12   | 0.6  |
| <b>Gender</b>                    |      |      |
| Female                           | 860  | 43.1 |
| Male                             | 1134 | 56.8 |
| Data missing                     | 2    | 0.1  |
| <b>Place of birth/upbringing</b> |      |      |
| Rural                            | 508  | 25.5 |
| Urban                            | 1444 | 72.3 |
| Data missing                     | 44   | 2.2  |
| <b>Religion</b>                  |      |      |
| Hindu                            | 1747 | 87.7 |
| Muslim                           | 97   | 4.9  |
| Christian                        | 17   | 0.9  |
| Other                            | 133  | 6.7  |
| Data missing                     | 2    | 0.1  |
| <b>Marital status</b>            |      |      |
| Single                           | 1970 | 98.7 |
| Married                          | 22   | 1.1  |
| Data missing                     | 4    | 0.2  |
| <b>Type of college</b>           |      |      |
| Private                          | 1423 | 71.3 |
| Public                           | 573  | 28.7 |

Is this table title correct?

Table 2. Educational background of all medical interns (n = 1996) from private colleges (n = 1402) and public colleges (n = 556). Data from 27 medical colleges (8 public, 19 private) in Maharashtra, India, 2011.

| Variable                                                                        | All<br>n (%) | Private<br>n (%) | Public<br>n (%) |
|---------------------------------------------------------------------------------|--------------|------------------|-----------------|
| Was sexual and reproductive health included in your curriculum?                 |              |                  |                 |
| Not at all                                                                      | 27 (1.4)     | 17 (1.2)         | 10 (1.8)        |
| Somewhat                                                                        | 468 (23.4)   | 352 (25.0)       | 116 (20.6)      |
| Sufficiently                                                                    | 1475 (73.9)  | 1039 (73.8)      | 436 (77.6)      |
| Data missing                                                                    | 26 (1.3)     |                  |                 |
| Have contraceptive methods been taught in your program?                         |              |                  |                 |
| Not at all                                                                      | 16 (0.8)     | 4 (0.3)          | 12 (2.1)        |
| Somewhat                                                                        | 199 (10.0)   | 143 (10.1)       | 56 (10.0)       |
| Sufficiently                                                                    | 1759 (88.1)  | 1265 (89.6)      | 494 (87.9)      |
| Data missing                                                                    | 22 (1.1)     |                  |                 |
| How do you assess your theoretical knowledge of sexual and reproductive health? |              |                  |                 |
| Poor                                                                            | 30 (1.5)     | 24 (1.7)         | 6 (1.1)         |
| Fair                                                                            | 552 (27.7)   | 381 (27.0)       | 171 (30.9)      |
| Good                                                                            | 1122 (56.2)  | 815 (57.8)       | 307 (55.4)      |
| Very good                                                                       | 260 (13.0)   | 190 (13.5)       | 70 (12.6)       |
| Data missing                                                                    | 32 (1.6)     |                  |                 |
| Have you had clinical practice in abortion care services during your training?  |              |                  |                 |
| Yes                                                                             | 268 (13.4)   | 196 (14.1)       | 72 (13.0)       |
| No                                                                              | 1678 (84.1)  | 1196 (85.9)      | 482 (87.0)      |
| Data missing                                                                    | 50 (2.5)     |                  |                 |

Table 3. Attitudes and perceptions towards contraception among medical interns in Maharashtra, India (n = 1996). Data from 27 medical colleges (8 public, 19 private) in 2011.

| Statement                                                                            |   | Disagree Completely | Disagree | Neither | Agree | Agree completely | Missing |
|--------------------------------------------------------------------------------------|---|---------------------|----------|---------|-------|------------------|---------|
| Contraceptive pills might cause cancer                                               | n | 118                 | 267      | 170     | 1126  | 304              | 11      |
|                                                                                      | % | 5.9                 | 13.4     | 8.5     | 56.1  | 15.2             | 0.6     |
| Contraceptive pills can cause infertility                                            | n | 526                 | 857      | 227     | 349   | 25               | 12      |
|                                                                                      | % | 26.4                | 42.9     | 11.4    | 17.5  | 1.3              | 0.6     |
| Contraceptive pills are inconvenient to use                                          | n | 608                 | 855      | 236     | 249   | 38               | 10      |
|                                                                                      | % | 30.5                | 42.8     | 11.8    | 12.5  | 1.9              | 0.5     |
| Emergency contraceptive pills can be used several times a month                      | n | 972                 | 630      | 115     | 227   | 37               | 15      |
|                                                                                      | % | 48.7                | 31.6     | 5.8     | 11.4  | 1.9              | 0.8     |
| Condoms protect against STD/HIV                                                      | n | 30                  | 19       | 22      | 556   | 1361             | 8       |
|                                                                                      | % | 1.5                 | 1.0      | 1.1     | 27.9  | 68.2             | 0.4     |
| Traditional contraceptive methods (safe periods, withdrawal) are the best methods    | n | 647                 | 913      | 166     | 190   | 69               | 11      |
|                                                                                      | % | 32.4                | 45.7     | 8.3     | 9.5   | 3.5              | 0.6     |
| Contraceptive information should only be for married couples                         | n | 1305                | 566      | 57      | 41    | 20               | 7       |
|                                                                                      | % | 65.4                | 28.4     | 2.9     | 2.1   | 1.0              | 0.4     |
| Doctors working in abortion services have friendly attitudes towards unmarried women | n | 166                 | 346      | 559     | 695   | 215              | 15      |
|                                                                                      | % | 8.3                 | 17.3     | 28.0    | 34.8  | 10.8             | 0.8     |
| Married couples are shy to talk about contraception with each other                  | n | 150                 | 629      | 423     | 720   | 64               | 10      |
|                                                                                      | % | 7.5                 | 31.5     | 21.2    | 36.1  | 3.2              | 0.5     |
| Women feel confident discussing contraception with doctors                           | n | 86                  | 654      | 445     | 696   | 105              | 10      |
|                                                                                      | % | 4.3                 | 32.8     | 22.3    | 34.9  | 5.3              | 0.5     |
| Traditional values are barriers for sex education in India                           | n | 72                  | 137      | 116     | 939   | 722              | 10      |
|                                                                                      | % | 3.6                 | 6.9      | 5.8     | 47.0  | 36.2             | 0.5     |
| Sex education encourages unmarried people to have sex                                | n | 536                 | 824      | 329     | 232   | 68               | 7       |
|                                                                                      | % | 26.9                | 41.3     | 16.5    | 11.6  | 3.4              | 0.4     |

Table 4. Place of birth in relation to knowledge, attitude and perceptions on contraception (n = 1996). Summary of significant findings from the study conducted in Maharashtra, India, 2011.

| Statement                                                                            |       |            | %    | Confidence interval |
|--------------------------------------------------------------------------------------|-------|------------|------|---------------------|
| Contraceptive pills might prevent cervical cancer                                    |       |            | 62.2 | 52.2–70.5           |
|                                                                                      |       |            | 71.8 | 61.8–76.4           |
| Doctors working in abortion services have friendly attitudes towards unmarried women | Urban | 617 (42.4) | 51.5 | 41.5–60.2           |
|                                                                                      | Rural | 105 (20.2) | 39.8 | 29.8–45.0           |
| Sex education encourages unmarried people to have sex                                | Rural | 105 (20.2) | 16.9 | 6.9–24.0            |
|                                                                                      | Urban | 193 (13.2) | 11.5 | 1.5–15.1            |

<sup>a</sup>Number of students does not always total 1996 due to missing answers

this title is also not describing the table content properly. It is difficult to say that this table present knowledge attitude and perceptions, because it has only three questions. I'm not sure which question addresses which component. How did you chose these three questions from the list of questions? In the table 3, you mentioned only the attitude and perceptions, but in this table knowledge is also included with the same questions



Table 5. Comparison of male and female medical interns' knowledge, attitudes, and perceptions towards contraception (n = 1996) (Private and public hospitals and private) in Maharashtra, India, 2011.

same comments as above two tables,

| Statement                                                                                   | Gender | Agree or agree completely<br>n <sup>a</sup> (%) | 95% Confidence Interval |
|---------------------------------------------------------------------------------------------|--------|-------------------------------------------------|-------------------------|
| <b>Contraceptive pills might cause cancer<sup>b</sup></b>                                   | F      | <b>753 (68.0)</b>                               | <b>74.1–79.9</b>        |
|                                                                                             | M      | <b>753 (68.0)</b>                               | <b>65.2–70.8</b>        |
| Contraceptive pills can cause infertility                                                   | F      | 150 (17.7)                                      | 15.2–20.4               |
|                                                                                             | M      | 216 (19.5)                                      | 17.2–22.0               |
| Contraceptive pills are inconvenient to use                                                 | F      | 132 (15.6)                                      | 13.2–18.2               |
|                                                                                             | M      | 149 (13.4)                                      | 11.5–15.6               |
| <b>Emergency contraceptive pills can be used several times a month</b>                      | F      | <b>76 (9.0)</b>                                 | <b>7.2–11.1</b>         |
|                                                                                             | M      | <b>182 (16.5)</b>                               | <b>14.3–18.8</b>        |
| <b>Condoms protect against STD/HIV</b>                                                      | F      | <b>830 (97.9)</b>                               | <b>96.7–98.7</b>        |
|                                                                                             | M      | <b>1056 (95.3)</b>                              | <b>93.9–96.5</b>        |
| Traditional contraceptive methods (safe periods, withdrawal) are the best methods           | F      | 90 (10.7)                                       | 8.7–12.9                |
|                                                                                             | M      | 163 (14.7)                                      | 12.7–16.9               |
| Contraceptive information should only be for married couples                                | F      | 22 (2.6)                                        | 1.6–3.9                 |
|                                                                                             | M      | 37 (3.3)                                        | 2.4–4.6                 |
| <b>Doctors working in abortion services have friendly attitudes towards unmarried women</b> | F      | <b>326 (38.5)</b>                               | <b>35.2–41.9</b>        |
|                                                                                             | M      | <b>569 (51.4)</b>                               | <b>48.4–54.4</b>        |
| Married couples are shy to talk about contraception with each other                         | F      | 311 (36.7)                                      | 33.5–40.1               |
|                                                                                             | M      | 462 (41.7)                                      | 38.8–44.7               |
| Women feel confident discussing contraception with doctors                                  | F      | 350 (41.3)                                      | 37.9–44.7               |
|                                                                                             | M      | 438 (39.5)                                      | 36.6–42.5               |
| Traditional values are barriers for sex education in India                                  | F      | 718 (84.8)                                      | 82.2–87.1               |
|                                                                                             | M      | 920 (83.0)                                      | 80.6–85.1               |
| <b>Sex education encourages unmarried people to have sex</b>                                | F      | <b>88 (10.4)</b>                                | <b>8.4–12.6</b>         |
|                                                                                             | M      | <b>209 (18.8)</b>                               | <b>16.6–21.3</b>        |

<sup>a</sup>Number of students does not always total 1996 due to missing answers

<sup>b</sup>**Bold** indicates significant difference

Table 1. Demographics for medical interns in Maharashtra, India, 2011 (n = 1996). Data from 27 medical colleges (8 public, 19 private).

| Variable                         | n    | %    |
|----------------------------------|------|------|
| <b>Age</b>                       |      |      |
| 20–24                            | 1886 | 94.4 |
| 25 and above                     | 98   | 5.0  |
| Data missing                     | 12   | 0.6  |
| <b>Gender</b>                    |      |      |
| Female                           | 860  | 43.1 |
| Male                             | 1134 | 56.8 |
| Data missing                     | 2    | 0.1  |
| <b>Place of birth/upbringing</b> |      |      |
| Rural                            | 508  | 25.5 |
| Urban                            | 1444 | 72.3 |
| Data missing                     | 44   | 2.2  |
| <b>Religion</b>                  |      |      |
| Hindu                            | 1747 | 87.7 |
| Muslim                           | 97   | 4.9  |
| Christian                        | 17   | 0.9  |
| Other                            | 133  | 6.7  |
| Data missing                     | 2    | 0.1  |
| <b>Marital status</b>            |      |      |
| Single                           | 1970 | 98.7 |
| Married                          | 22   | 1.1  |
| Data missing                     | 4    | 0.2  |
| <b>Type of college</b>           |      |      |
| Private                          | 1423 | 71.3 |
| Public                           | 573  | 28.7 |

Table 2. Educational background of all medical interns (n = 1996) from private colleges (n = 1402) and public colleges (n = 556). Data from 27 medical colleges (8 public, 19 private) in Maharashtra, India, 2011.

| Variable                                                                        | All<br>n (%) | Private<br>n (%) | Public<br>n (%) |
|---------------------------------------------------------------------------------|--------------|------------------|-----------------|
| Was sexual and reproductive health included in your curriculum?                 |              |                  |                 |
| Not at all                                                                      | 27 (1.4)     | 17 (1.2)         | 10 (1.8)        |
| Somewhat                                                                        | 468 (23.4)   | 352 (25.0)       | 116 (20.6)      |
| Sufficiently                                                                    | 1475 (73.9)  | 1039 (73.8)      | 436 (77.6)      |
| Data missing                                                                    | 26 (1.3)     |                  |                 |
| Have contraceptive methods been taught in your program?                         |              |                  |                 |
| Not at all                                                                      | 16 (0.8)     | 4 (0.3)          | 12 (2.1)        |
| Somewhat                                                                        | 199 (10.0)   | 143 (10.1)       | 56 (10.0)       |
| Sufficiently                                                                    | 1759 (88.1)  | 1265 (89.6)      | 494 (87.9)      |
| Data missing                                                                    | 22 (1.1)     |                  |                 |
| How do you assess your theoretical knowledge of sexual and reproductive health? |              |                  |                 |
| Poor                                                                            | 30 (1.5)     | 24 (1.7)         | 6 (1.1)         |
| Fair                                                                            | 552 (27.7)   | 381 (27.0)       | 171 (30.9)      |
| Good                                                                            | 1122 (56.2)  | 815 (57.8)       | 307 (55.4)      |
| Very good                                                                       | 260 (13.0)   | 190 (13.5)       | 70 (12.6)       |
| Data missing                                                                    | 32 (1.6)     |                  |                 |
| Have you had clinical practice in abortion care services during your training?  |              |                  |                 |
| Yes                                                                             | 268 (13.4)   | 196 (14.1)       | 72 (13.0)       |
| No                                                                              | 1678 (84.1)  | 1196 (85.9)      | 482 (87.0)      |
| Data missing                                                                    | 50 (2.5)     |                  |                 |

Table 3. Attitudes and perceptions towards contraception among medical interns in Maharashtra, India (n = 1996). Data from 27 medical colleges (8 public, 19 private) in 2011.

| Statement                                                                            |   | Disagree Completely | Disagree | Neither | Agree | Agree completely | Missing |
|--------------------------------------------------------------------------------------|---|---------------------|----------|---------|-------|------------------|---------|
| Contraceptive pills might cause cancer                                               | n | 118                 | 267      | 170     | 1126  | 304              | 11      |
|                                                                                      | % | 5.9                 | 13.4     | 8.5     | 56.1  | 15.2             | 0.6     |
| Contraceptive pills can cause infertility                                            | n | 526                 | 857      | 227     | 349   | 25               | 12      |
|                                                                                      | % | 26.4                | 42.9     | 11.4    | 17.5  | 1.3              | 0.6     |
| Contraceptive pills are inconvenient to use                                          | n | 608                 | 855      | 236     | 249   | 38               | 10      |
|                                                                                      | % | 30.5                | 42.8     | 11.8    | 12.5  | 1.9              | 0.5     |
| Emergency contraceptive pills can be used several times a month                      | n | 972                 | 630      | 115     | 227   | 37               | 15      |
|                                                                                      | % | 48.7                | 31.6     | 5.8     | 11.4  | 1.9              | 0.8     |
| Condoms protect against STD/HIV                                                      | n | 30                  | 19       | 22      | 556   | 1361             | 8       |
|                                                                                      | % | 1.5                 | 1.0      | 1.1     | 27.9  | 68.2             | 0.4     |
| Traditional contraceptive methods (safe periods, withdrawal) are the best methods    | n | 647                 | 913      | 166     | 190   | 69               | 11      |
|                                                                                      | % | 32.4                | 45.7     | 8.3     | 9.5   | 3.5              | 0.6     |
| Contraceptive information should only be for married couples                         | n | 1305                | 566      | 57      | 41    | 20               | 7       |
|                                                                                      | % | 65.4                | 28.4     | 2.9     | 2.1   | 1.0              | 0.4     |
| Doctors working in abortion services have friendly attitudes towards unmarried women | n | 166                 | 346      | 559     | 695   | 215              | 15      |
|                                                                                      | % | 8.3                 | 17.3     | 28.0    | 34.8  | 10.8             | 0.8     |
| Married couples are shy to talk about contraception with each other                  | n | 150                 | 629      | 423     | 720   | 64               | 10      |
|                                                                                      | % | 7.5                 | 31.5     | 21.2    | 36.1  | 3.2              | 0.5     |
| Women feel confident discussing contraception with doctors                           | n | 86                  | 654      | 445     | 696   | 105              | 10      |
|                                                                                      | % | 4.3                 | 32.8     | 22.3    | 34.9  | 5.3              | 0.5     |
| Traditional values are barriers for sex education in India                           | n | 72                  | 137      | 116     | 939   | 722              | 10      |
|                                                                                      | % | 3.6                 | 6.9      | 5.8     | 47.0  | 36.2             | 0.5     |
| Sex education encourages unmarried people to have sex                                | n | 536                 | 824      | 329     | 232   | 68               | 7       |
|                                                                                      | % | 26.9                | 41.3     | 16.5    | 11.6  | 3.4              | 0.4     |

Table 4. Place of birth in relation to knowledge, attitudes, and perceptions on contraception (n = 1996). Summary of significant findings among medical interns in Maharashtra, India, 2011.

| Statement                                                                            | Place of birth | Agree or agree completely<br>n <sup>a</sup> (%) | 95% Confidence Interval |
|--------------------------------------------------------------------------------------|----------------|-------------------------------------------------|-------------------------|
| Contraceptive pills might cause cancer                                               | Rural          | 344 (66.4)                                      | 62.2–70.5               |
|                                                                                      | Urban          | 1081 (74.1)                                     | 71.8–76.4               |
| Doctors working in abortion services have friendly attitudes towards unmarried women | Rural          | 289 (55.9)                                      | 51.5–60.2               |
|                                                                                      | Urban          | 617 (42.4)                                      | 39.8–45.0               |
| Sex education encourages unmarried people to have sex                                | Rural          | 105 (20.2)                                      | 16.9–24.0               |
|                                                                                      | Urban          | 193 (13.2)                                      | 11.5–15.1               |

<sup>a</sup>Number of students does not always total 1996 due to missing answers

Table 5. Comparison of male and female medical interns' knowledge, attitudes, and perceptions towards contraception (n = 1996). Data from 27 medical colleges (8 public, 19 private) in Maharashtra, India, 2011.

| Statement                                                                                   | Gender | Agree or agree completely<br>n <sup>a</sup> (%) | 95% Confidence Interval |
|---------------------------------------------------------------------------------------------|--------|-------------------------------------------------|-------------------------|
| <b>Contraceptive pills might cause cancer<sup>b</sup></b>                                   | F      | <b>652 (77.1)</b>                               | <b>74.1–79.9</b>        |
|                                                                                             | M      | <b>753 (68.0)</b>                               | <b>65.2–70.8</b>        |
| Contraceptive pills can cause infertility                                                   | F      | 150 (17.7)                                      | 15.2–20.4               |
|                                                                                             | M      | 216 (19.5)                                      | 17.2–22.0               |
| Contraceptive pills are inconvenient to use                                                 | F      | 132 (15.6)                                      | 13.2–18.2               |
|                                                                                             | M      | 149 (13.4)                                      | 11.5–15.6               |
| <b>Emergency contraceptive pills can be used several times a month</b>                      | F      | <b>76 (9.0)</b>                                 | <b>7.2–11.1</b>         |
|                                                                                             | M      | <b>182 (16.5)</b>                               | <b>14.3–18.8</b>        |
| <b>Condoms protect against STD/HIV</b>                                                      | F      | <b>830 (97.9)</b>                               | <b>96.7–98.7</b>        |
|                                                                                             | M      | <b>1056 (95.3)</b>                              | <b>93.9–96.5</b>        |
| Traditional contraceptive methods (safe periods, withdrawal) are the best methods           | F      | 90 (10.7)                                       | 8.7–12.9                |
|                                                                                             | M      | 163 (14.7)                                      | 12.7–16.9               |
| Contraceptive information should only be for married couples                                | F      | 22 (2.6)                                        | 1.6–3.9                 |
|                                                                                             | M      | 37 (3.3)                                        | 2.4–4.6                 |
| <b>Doctors working in abortion services have friendly attitudes towards unmarried women</b> | F      | <b>326 (38.5)</b>                               | <b>35.2–41.9</b>        |
|                                                                                             | M      | <b>569 (51.4)</b>                               | <b>48.4–54.4</b>        |
| Married couples are shy to talk about contraception with each other                         | F      | 311 (36.7)                                      | 33.5–40.1               |
|                                                                                             | M      | 462 (41.7)                                      | 38.8–44.7               |
| Women feel confident discussing contraception with doctors                                  | F      | 350 (41.3)                                      | 37.9–44.7               |
|                                                                                             | M      | 438 (39.5)                                      | 36.6–42.5               |
| Traditional values are barriers for sex education in India                                  | F      | 718 (84.8)                                      | 82.2–87.1               |
|                                                                                             | M      | 920 (83.0)                                      | 80.6–85.1               |
| <b>Sex education encourages unmarried people to have sex</b>                                | F      | <b>88 (10.4)</b>                                | <b>8.4–12.6</b>         |
|                                                                                             | M      | <b>209 (18.8)</b>                               | <b>16.6–21.3</b>        |

<sup>a</sup>Number of students does not always total 1996 due to missing answers

<sup>b</sup>**Bold** indicates significant difference

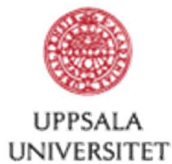

Falun 130522

Dear Editor,

We were pleased to read your positive response regarding our manuscript entitled "Future physicians' knowledge, attitudes, and perceptions on contraceptive use and counselling: a cross-sectional survey among medical interns in Maharashtra, India" and we would like to thank you for the useful comments. We have made revision according to your suggestions. Please find attached a detailed description of our changes of the manuscript, according to the reviewers and editor's comments. We hereby resubmit the manuscript for publication.

We confirm that this manuscript has not been published elsewhere and is not under consideration by another journal. All authors have approved the manuscript and agree with its submission to BMJ Family Planning and Reproductive Health Care.

Yours Sincerely,

Marie Klingberg-Allvin, PhD

**Associate Editor**

1  
2  
3  
4  
5  
6  
7  
8  
9  
10  
11  
12  
13  
14  
15  
16  
17  
18  
19  
20  
21  
22  
23  
24  
25  
26  
27  
28  
29  
30  
31  
32  
33  
34  
35  
36  
37  
38  
39  
40  
41  
42  
43  
44  
45  
46  
47  
48  
49  
50  
51  
52  
53  
54  
55  
56  
57  
58  
59  
60

1. The **aim of the study needs clarification** as does the study question that led to the research being carried out. The study design does not lend itself to analysis of the views of participants in the manner it has been presented.

*Author's comments: We have revised the aim in order to clarify according to your comment.*

2. It would be helpful to identify and present the various stages at which bias has entered the study and the ways in which it could be addressed in future studies. The reason why medical students were considered for the study are also not clear. If the point was to study views of medical students because of their age group and socio-cultural background then the comparison group should have been non-medical students of similar backgrounds. This would then highlight if the differences in opinion were due to the medical training rather than socio-cultural influences.

*Author's comments: Medical students are the future provider of abortion care and contraceptive counseling in India and are therefore the targeted subjects/population in our study. It is not really relevant to compare with non-physicians as no other professionals are permitted by law to conduct comprehensive abortion care of which post abortion contraceptive counseling is central.*

**Reviewer #1**

1. Information given on sampling technique is inadequate to decide the external validity of this study. The only information given was that 27 out of 43 colleges participated in this study (8 public and 19 private). So the sample has self-selection bias. Was this similar to the ratio of public private medical schools in the district?

*Author's comments: We agree with you and have added more information about the sampling technique (page 8, paragraph 1) and also discuss this in the section methodological considerations (page 18, paragraph 2).*

2. Analysis of place of birth: this seems to be confounded by the place where they were brought up, which was not discussed in the paper. There is no rationale for taking place of birth for analysis unless someone assumes that it is a proxy measure of the place they lived the longest period where the perceptions and attitudes could be influenced from the residential area. This assumption should be adequately rationalized showing that there was limited internal migration in this area.

*Author's comments: In our study the definition of place of birth/area of upbringing (page 9, paragraph 1) and is a well-known proxy (urban or rural area) for attitudes and perceptions in relation to sexual and reproductive health issues. This was also found in our study, that interns born in rural areas had more negative perceptions of sex education. Internal migration is not very common in this context.*

3. What was the rationale for using confidence limits? The sample of medical schools participating in the study was selected using a non-probability sampling technique. From these schools, all intern medical graduates were participated in the study (not a sample). Inferences cannot be on other med schools based on this, even though one can discuss all possibilities.

*Author's comments: Reporting of estimate and p-value only is widely criticized in statistical literature because it suppresses all other information but whether it is significantly*



1 different from a hypothetical value or not. The confidence interval gives a range measure  
2 of uncertainty and is therefore more informative than a p-value. The validity in relation to  
3 sampling technique is now discussed in the section methodological considerations (page  
4 18, paragraph 2).  
5  
6

#### 7 **4. Table 3 – column title is partially missing**

8 *Author's comments: Have been added accordingly.*  
9

10  
11 5. In the Discussion, the above mentioned study limitations should be clearly mentioned  
12 in a separate paragraph.

13 *Author's comments: We have added a separate section: Methodological considerations*  
14 *(page 18, paragraph 2).*  
15  
16

#### 17 **Reviewer #2**

18 1. As all five authors are from Sweden for this study in Maharashtra, the role of the New  
19 Delhi office of IPAS is not clear because it can be expected that at least one author would  
20 be from India.  
21

22 *Author's comments: Ipas office in Delhi distributed the questionnaires and was invited to*  
23 *take part in analyses and writing however they rejected. Those who have made a*  
24 *substantive intellectual contribution to the manuscript are acknowledged as author.*  
25 *Intellectual contribution to the manuscript requiring participation in the conception or*  
26 *design of the study, the analysis or interpretation of data, or drafting or revising the*  
27 *manuscript for content. It does not include acquisition of data using methods designed by*  
28 *others, collection of data, obtaining funding, supervising personnel, or medical editing*  
29 *assistance.*  
30  
31

32 2. The manuscript is much too long and could easily be decreased by half, specially for  
33 the Introduction (Pages 4/5), Instrument and Statistical Analysis (Pages 7/8),  
34 Methodological Considerations (Pages 15/16) and the 46 references. Interesting  
35 findings from the study relate to the lack of clinical practice in abortion care services  
36 during training (Page 9, Lines 10/13), differences between private and public colleges  
37 on abortion (Page 10, Lines 9/17) and major misconceptions such as the role of sex  
38 education in encouraging sexual activities among those who are unmarried (Page 10,  
39 Line 46). The manuscript should focus on the above important programmatic items as  
40 well as the delegation of tasks (Page 14, Lines 16/31) as opposed to unresolved issues  
41 (Page 11, Lines 38/42).  
42

43 *Author's comments: Thanks, we agree with you and have reduced the text in the sections;*  
44 *introduction and instrument. We have further made major revision of the discussion in*  
45 *order to focus on the most important findings of our study according to your suggestion.*  
46 *The number of references has also been decreased.*  
47  
48  
49  
50  
51  
52  
53  
54  
55  
56  
57  
58  
59  
60



**Medical students' knowledge, attitudes, and perceptions on contraceptive use and counselling: a cross-sectional survey in Maharashtra, India**

|                                 |                                                                                                                                                                                                                                                                                                                                                                                                                                                                        |
|---------------------------------|------------------------------------------------------------------------------------------------------------------------------------------------------------------------------------------------------------------------------------------------------------------------------------------------------------------------------------------------------------------------------------------------------------------------------------------------------------------------|
| Journal:                        | <i>BMJ Open</i>                                                                                                                                                                                                                                                                                                                                                                                                                                                        |
| Manuscript ID:                  | bmjopen-2013-003739.R1                                                                                                                                                                                                                                                                                                                                                                                                                                                 |
| Article Type:                   | Research                                                                                                                                                                                                                                                                                                                                                                                                                                                               |
| Date Submitted by the Author:   | 03-Oct-2013                                                                                                                                                                                                                                                                                                                                                                                                                                                            |
| Complete List of Authors:       | Hogmark, Sara; Uppsala University, Womens and Childrens Health; Falu County Hospital, Obstetrics and Gynaecology<br>Klingberg-allvin, Marie; Uppsala University, Womens and Childrens Health; Dalarna University, School of Social and Health Science<br>Gemzell, Kristina; Karolinska Institutet, Womens and Childrens Health<br>Ohlsson, Hannes; Uppsala University, Womens and Childrens Health<br>Essen, Birgitta; Uppsala University, Womens and Childrens Health |
| <b>Primary Subject Heading</b>: | Obstetrics and gynaecology                                                                                                                                                                                                                                                                                                                                                                                                                                             |
| Secondary Subject Heading:      | Global health, Obstetrics and gynaecology, Public health, Sexual health, Medical education and training                                                                                                                                                                                                                                                                                                                                                                |
| Keywords:                       | EDUCATION & TRAINING (see Medical Education & Training), Reproductive medicine < GYNAECOLOGY, Public health < INFECTIOUS DISEASES                                                                                                                                                                                                                                                                                                                                      |
|                                 |                                                                                                                                                                                                                                                                                                                                                                                                                                                                        |

SCHOLARONE™  
Manuscripts

Only

1  
2  
3  
4  
5  
6  
7  
8  
9  
10  
11 Title: Medical students' knowledge, attitudes, and perceptions on contraceptive use and  
12 counselling: a cross-sectional survey in Maharashtra, India  
13

14  
15 Hogmark Sara, MD, Dept. of Obstetrics and Gynaecology, Falu County Hospital, Falun,  
16 Sweden; Dept. of Women's and Children's Health (IMCH), Uppsala University, Sweden  
17  
18

19  
20 Klingberg-Allvin Marie, Senior Lecturer, Dept. of Women's and Children's Health, Uppsala  
21 University; Dept. of Women's and Children's Health, Karolinska Institutet; School of Social  
22 and Health Science, Dalarna University, Sweden  
23  
24

25  
26 Ohlsson Hannes, MD, Dept. of Women's and Children's Health (IMCH), Uppsala University,  
27 Sweden  
28  
29

30  
31 Gemzell-Danielsson Kristina, Professor, Dept. of Women's and Children's Health,  
32 Karolinska Institutet, Sweden  
33  
34

35  
36  
37  
38 Essén Birgitta, Asst. Prof., Dept. of Women's and Children's Health (IMCH), Uppsala  
39 University, Sweden  
40  
41

42  
43  
44  
45 Keywords: contraceptives, medical students, India, reproductive health, cross sectional survey  
46  
47

48 Word count: 2480 (excluding abstract and references)  
49  
50  
51  
52  
53

1  
2  
3  
4  
5  
6  
7  
8  
9  
10  
11 ABSTRACT

12  
13 *Objectives:* This study aimed to investigate knowledge, attitudes and perceptions on  
14 contraceptive use and counselling among medical students in Maharashtra, India.  
15

16  
17 *Setting:* Considerable global maternal mortality and morbidity could be avoided through the  
18 use of effective contraception. In India, contraception services are frequently unavailable or  
19 there are obstacles to obtaining modern, reversible contraceptives.  
20

21  
22 *Participants:* A cross-sectional descriptive study using a self-administered questionnaire was  
23 conducted among 1996 medical students in their fifth year of study at 27 medical colleges in  
24 the state of Maharashtra, India. Descriptive and analytical statistics interpreted the survey  
25 instrument and significant results were presented with a 95% confidence interval.  
26

27  
28 *Results:* Respondents expressed the desire to provide contraceptive services. Few had  
29 experienced training in abortion care. There were misconceptions about modern contraceptive  
30 methods and the impact of sex education. Attitudes towards contraception were mainly  
31 positive, pre-marital counselling was supported, and the influence of traditional values and  
32 negative provider attitudes on services was recognized. Gender, area of upbringing, and type  
33 of medical college did not change the results.  
34

35  
36 *Conclusions:* Despite mostly positive attitudes towards modern contraceptives, sex education,  
37 and family planning counselling, future physicians in Maharashtra show misconceptions  
38 about modern contraceptives prevail. Pre- and in-service training in contraceptive counselling  
39 should be implemented in order to increase women's access to evidence-based maternal  
40 health care services. Expanding the provider base to health care professionals other than  
41 physicians would further increase the availability of services.  
42  
43  
44  
45  
46  
47  
48  
49  
50  
51  
52  
53  
54  
55  
56  
57  
58  
59  
60

### Article summary

Contraceptive use is an effective primary prevention strategy to avoid unintended pregnancies and unsafe abortions and thus reduces maternal mortality and morbidity.

This study aimed to investigate knowledge, attitudes and perceptions on contraceptive use and counselling among medical students in Maharashtra, India.

### Key message points

Despite mostly positive attitudes towards modern contraceptives, sex education, and family planning counselling, medical students in Maharashtra show misconceptions about modern contraceptives, and lack training in family planning services.

Respondents expressed a desire to provide sexual and reproductive health services to people regardless of their marital status.

Pre- and in-service training in evidence-based contraceptive counselling should be implemented in order to increase the access to comprehensive family planning services in India.

### Strengths and Limitations

This study contributes with important evidence that may be used to revise pre- and in service training in contraceptive counselling and thus reduce maternal mortality related to unintended pregnancies in India.

Important limitation with this study is the non-probability sampling technique applied and this might reduce the external validity.

The large sample size and the high proportion of the total number and the presence of medical students from public and private medical schools in both urban and semi-urban settings strengthen the generalizability.

## INTRODUCTION

Contraceptive use is an effective primary prevention strategy for reducing maternal mortality [1]. It has been estimated that the use of effective contraception could avert 90% of abortion-related and more than 20% of obstetric-related mortality globally [2]. Abortion incidence is inversely associated with the level of contraceptive use, especially where fertility rates are stable [3]. In addition, comprehensive sex education has the potential to prevent unintended pregnancies that lead to unsafe abortions [4]. In order to meet the increasing demand for contraceptives and ensure the sexual and reproductive health and rights of women, including the right to planned parenthood, intensified efforts are urgently needed [5].

India accounts for 20% of maternal deaths worldwide [6]. Despite the fact that induced abortion has been legal in India since 1971, most of the approximately 6.7 million annually induced abortions are performed in an unsafe manner [7, 8]. Moreover, a recent study concluded that 70% of all Indian women who have an abortion do not use post-abortion contraception [9]. The unmet need for modern contraceptives is 22% in the cities and higher in rural areas. Female sterilization is the most common contraceptive practice and accounts for 75% of all methods used [10]. The use of reversible, modern methods in order to postpone birth of a first child or for spacing births is infrequent [11].

Some of the barriers that impede women's access to contraception are health care providers who are inadequately trained, insufficient in number, and poorly supervised [12]. Studies have shown that improving quality of care increases and sustains contraceptive use by women [13]. Providers need adequate knowledge of contraceptive methods and training in counselling skills in order to provide reliable information to women [14]. Despite the availability of effective methods of contraception in India, many pregnancies remain unintended. Considering the future role of medical students as contraceptive counsellors, little

1  
2  
3  
4  
5  
6  
7  
8  
9  
10  
11 is known about their views on contraceptive methods, use or counselling. This study aimed to  
12 investigate knowledge, attitudes, and perceptions on contraceptive use and counselling among  
13 medical students in Maharashtra, India.  
14  
15

## 16 17 MATERIALS AND METHODS 18

19  
20 In February 2011, a cross-sectional survey was conducted using a pre-tested, self-  
21 administered questionnaire in the Indian state of Maharashtra among 1,996 medical students  
22 in their fifth year (internship) of training [15]. Out of a total of 43 medical colleges in  
23 Maharashtra (5,195 students), 19 are Public (2,200 students). A convenience sample of 27  
24 colleges (8 public, 556 students; 19 private, 1,402 students) was included in the study. All  
25 medical students at the selected institutions were asked to participate before attending a  
26 lecture in comprehensive abortion care (CAC). The lecture was organized by a non-  
27 governmental organization within the medical education program.  
28  
29  
30  
31  
32  
33

### 34 35 **Study setting** 36

37 Located in west-central India, Maharashtra is the country's second most populous state and  
38 the third largest by area. Of its 112 million inhabitants, a slight majority live in rural areas.  
39 Maharashtra's socio-economic status, literacy rate, and health infrastructure are better than  
40 the national average [16]. Medical education in India is regulated by the Medical Council of  
41 India and is either public or private. Medical education consists of 4.5 years of theoretical  
42 studies followed by one year of internship. According to the national medical education  
43 curriculum the theoretical studies should cover comprehensive abortion care, as well as  
44 contraceptive methods, and counselling[17].  
45  
46  
47  
48  
49  
50  
51  
52  
53  
54

## Instrument

The questionnaire contained three sections. Section 1 included socio-demographic characteristics as gender, age, religion, marital status, place of birth/area of upbringing, and type of college. Section 2 included questions related to perception of education and training in sexual and reproductive health, and respondents' assessment of their knowledge regarding contraceptive methods and services. Section 3 consisted of twelve statements on different aspects of contraceptive methods, services, and values surrounding sexual and reproductive health. Participants were asked to circle the most appropriate alternative on a five-point Likert scale (Disagree completely/Disagree/Neither agree nor disagree/Agree/Agree completely) [18].

## Statistical analysis

Questionnaires that contained one or more answers were included in the analysis. Statistical Package for Social Studies (SPSS) 20.0 software was used. Descriptive statistics were applied to all sections of the questionnaire; actual numbers and proportions were calculated; and cross-tabulations with intergroup comparisons of answers were made for students of different genders, types of colleges, and places of birth. The alternatives 'agree' and 'agree completely' were aggregated, as well as the alternatives 'disagree' and 'disagree completely'. Any difference with a 95% confidence interval (CI) was regarded as significant.

## Ethical considerations

The study was carried out in compliance with the principles of the World Medical Association Declaration of Helsinki. The medical students eligible for participation in the study were given oral information about the study and were informed that participation was anonymous



1  
2  
3  
4  
5  
6  
7  
8  
9  
10  
11 and voluntary and that choosing not to participate would not affect their studies or future  
12 careers negatively. By filling in the questionnaire written consent to participation was given.  
13 Permission to conduct the survey in connection with the training programme was obtained  
14 from the principal at each college. The study has been approved by the research ethical  
15 committee at Karolinska Institutet(Dnr: 2013/415-31/4).  
16  
17  
18  
19

## 20 RESULTS

21  
22  
23 Out of 2,006 questionnaires, 1,996 were at least partially filled-in, making the overall  
24 response rate 99.5%. The demographic characteristics of the students are outlined in Table 1.  
25 Since the students were homogenous in terms of age, religion, and marital status, the variables  
26 remaining for inter-group comparisons were gender (56.8% male, 43.1% female), place of  
27 birth (72.3% urban, 25.5% rural), and type of college (71.3% private, 28.7% public).  
28  
29  
30  
31

32  
33 Table 2 shows the students' perception of education and training in sexual and reproductive  
34 health, and respondents' assessment of their knowledge regarding contraceptive methods and  
35 services. Most of the students thought that the topic of reproductive health had been  
36 adequately covered in their curriculum, including contraceptive methods. A majority  
37 considered their theoretical knowledge in sexual and reproductive health fair or good. A large  
38 proportion reported having had no clinical practice in abortion care services during their  
39 training. A comparison between students from private and public colleges revealed no  
40 significant differences.  
41  
42  
43  
44  
45

46  
47 With regard to contraceptive counselling, 74.0% believed it should be given individually and  
48 not in a group. A majority of the respondents (67.2%) thought doctors should be the ones to  
49 provide contraception to patients, while 27.1% considered health workers to be the most  
50 appropriate counsellors. A few students chose other alternatives (nurse 3,0%, other 1,6%,  
51  
52  
53  
54

1  
2  
3  
4  
5  
6  
7  
8  
9  
10  
11 missing 1,1%). A majority (95.1%) indicated they would like to have responsibility for  
12 providing information on contraception as future doctors. Regarding the use of oral  
13 contraceptives, 88.5% of the students stated they should be taken every day. Some students  
14 (5.8%) thought they were to be taken after intercourse or once a month (3.4%). A cross-  
15 sectional analysis of answers given by students with rural versus urban places of birth  
16 revealed no significant differences with regard to these results. However, those from private  
17 colleges preferred individual contraceptive counselling over group counselling (private  
18 college students 78.2%, CI 95%, 75.9–80.3; public college students 70.6%, CI 95%, 66.6–  
19 74.4). Female students were also more supportive of individual counselling than males  
20 (females 80.2%, CI 95%, 77.4–82.9; males 72.8%, CI 95%, 70.1–75.4). Females also  
21 expressed a greater interest in having responsibility for providing contraceptive information  
22 as future doctors than males (females 98.2%, CI 95%, 96.8–98.8; males 95.3% CI, 93.8–  
23 96.4). Moreover, female students were better informed on the daily intake of oral  
24 contraceptive pills than males (females 93.3%, CI 95%, 91.5–94.9; males 88.8%, CI 95%,  
25 86.8–90.6).

26  
27  
28  
29  
30  
31  
32  
33  
34  
35  
36  
37 The knowledge, attitudes, and perceptions of medical students on contraceptive methods,  
38 services, and values surrounding sexual and reproductive health are shown in Table 3. Cross-  
39 sectional analysis comparing students from public and private colleges indicated a difference  
40 of opinion regarding the statement “Doctors working in abortion service have friendly  
41 attitudes towards unmarried women”. Fewer students from private colleges agreed or agreed  
42 completely as compared to students from public colleges (private college students 43.8%, CI  
43 95%, 41.8–46.4; public college students 51.2%, CI 95%, 47.0–51.4).

44  
45  
46  
47  
48  
49  
50 Table 4 summarizes the significant differences in perceptions found among students based on  
51 their place of birth (urban or rural): Students with urban place of birth to a higher extent  
52  
53

1  
2  
3  
4  
5  
6  
7  
8  
9  
10  
11 agreed to that “Contraceptive pills might cause cancer” (urban 74.1%, CI 95%, 71.8–76.4;  
12 rural 66.4%, CI 95%, 62.2–70.5); A larger proportion of students with rural background  
13 agreed to the statement that “Doctors working in abortion service have friendly attitudes  
14 towards unmarried women” (rural 55.9%, CI 95%, 51.6-60.2; urban 42.4, CI 95%, 39.8–  
15 45.0).; and it was more common for students with rural place of birth to agree to the statement  
16 “Sex education encourages unmarried people to have sex” (rural 20.2%, CI 95%, 16.9–24.0;  
17 urban 13.2, CI 95%, 11.5–15.1).  
18  
19  
20  
21  
22  
23

24 Table 5 compares male and female medical students’ knowledge, attitudes, and perceptions  
25 on contraception. More female students agreed or agreed completely that contraceptive pills  
26 might cause cancer. Males tended to believe that emergency contraceptive pills may be used  
27 several times a month. Both male and female students largely agreed or agreed completely  
28 that condoms protect against sexually transmitted diseases (STD) and HIV, although females  
29 were significantly more supportive of their use. One in five males versus one in ten females  
30 agreed or agreed completely that sex education encourages unmarried people to have sex.  
31 Among males, 51.4% agreed or agreed completely that doctors working in abortion services  
32 have friendly attitudes towards unmarried women, compared to 38.5% among females.  
33  
34  
35  
36  
37  
38  
39  
40  
41  
42

## 43 **DISCUSSION**

44  
45 The major finding in this study is the inadequate level of training in comprehensive abortion  
46 care and contraceptive counselling of medical students who already passed the theoretical part  
47 of the medical education. Our findings further suggest that even though the medical students  
48 surveyed had experienced little training in abortion care services, they expressed a clear  
49 interest in disseminating contraceptive information as future physicians. Although they had  
50  
51  
52  
53  
54  
55  
56  
57  
58  
59  
60

1  
2  
3  
4  
5  
6  
7  
8  
9  
10  
11 mostly positive attitudes toward contraception and pre-marital counselling, misconceptions  
12 about modern contraceptive methods and the impact of sex education were common.  
13

14  
15 Few respondents in our study had had any clinical experience in abortion care services, yet a  
16 majority thought the topics of sexual and reproductive health and contraceptive methods had  
17 been adequately covered in their coursework. Still, nearly one in five interns falsely believed  
18 that contraceptive pills can cause infertility and one in ten did not know that contraceptive  
19 pills are to be taken on a daily basis. More females than males were unaware that emergency  
20 contraceptive pills may be used several times a month. A majority of both males and females  
21 perceived that contraceptive pills might cause cancer, although females were more likely to  
22 agree on this. Recent studies indicate that family planning training during residency improves  
23 future physicians' proficiency in contraceptive counselling [19].  
24  
25  
26  
27  
28  
29  
30

31  
32 Our findings did not reveal any differences in self-rated or theoretical knowledge between  
33 public and private college students. The background factor that had the greatest influence on  
34 knowledge was gender. Female students were better informed about the utilisation of oral  
35 contraceptives and the protection that condoms offer against STD/HIV. They also report that  
36 sex education does not encourage unmarried people to have sex. Regardless of demographic  
37 background, most students in our study recognized that traditional values are barriers to sex  
38 education. Few thought contraceptive information should only be provided to married  
39 couples, although students born in rural areas had more negative perceptions of sex education.  
40 The socio-cultural norms of Indian society contribute to making sex-related issues taboo and  
41 hinder young people from seeking counselling regarding sexual health [20]. Research reveals  
42 that health care providers often impose unnecessary barriers in dispensing contraceptives,  
43 including denial of a contraceptive method on the basis of age, parity, marital status, or lack  
44 of parental or spousal authorization [21, 22]. One in four respondents in our study did not  
45  
46  
47  
48  
49  
50  
51  
52  
53

1  
2  
3  
4  
5  
6  
7  
8  
9  
10  
11 believe doctors working in abortion services held positive attitudes towards unmarried  
12 women.  
13

14  
15 Although nearly all students in our survey said they would like to assume the responsibility  
16 for contraceptive counselling in their future careers, the current shortage of providers  
17 (especially in rural areas) may require the shifting of tasks. Task sharing or shifting within  
18 family planning services is recommended by the WHO [23]. The involvement of clinical  
19 officers, midwives and nurses increases the access to modern contraception in low resource  
20 settings [24]. The fact that one-fourth of our respondents believed that health workers, rather  
21 than physicians, were best suited to dispense contraceptive information suggests that future  
22 physicians would be willing to relegate such tasks to others.  
23  
24  
25  
26  
27  
28  
29

30 Several studies conclude that even though abortion providers discuss contraception with their  
31 patients, it is common for patients to refuse any form of contraception following an abortion  
32 [25, 26]. The quality of provider counselling and patient education is important for the  
33 successful integration of new hormonal methods of contraception into clinical practice [27].  
34 Medical students need training in comprehensive sexual and reproductive health services that  
35 conforms with international human rights standards and include respect for privacy and  
36 confidentiality, in order to provide full and accurate information to their future patients.  
37  
38  
39  
40  
41  
42

### 43 **METHODOLOGICAL CONSIDERATIONS**

44  
45 One weakness is the non-probability sampling technique applied in our study and this might  
46 reduce the external validity. The large sample size and the fact that a fairly high proportion of  
47 the total number of students in both private (47.5%) and public (26.0%) colleges is included  
48 are thought to strengthen the validity. However, since India is a country with large regional  
49 differences in socioeconomic and health status, our results may not be representative of all  
50  
51  
52  
53

1  
2  
3  
4  
5  
6  
7  
8  
9  
10  
11 medical students in the country. On the other hand, the presence of students from public and  
12 private medical schools in both urban and semi-urban settings may strengthen the  
13 generalizability for Maharashtra. The method of using anonymous questionnaires is suitable  
14 for sensitive topics like sexual and reproductive health. The reliability and validity of the  
15 survey is strengthened through previous testing of the instrument.  
16  
17  
18  
19

## 20 **CONCLUSIONS**

21  
22  
23 We have found positive and negative attitudes towards modern contraceptive methods, sex  
24 education, and family planning counselling among future physicians in India. There has been  
25 a willingness to offer sexual and reproductive health services to people regardless of their  
26 marital status. Still, future physicians in Maharashtra have misconceptions about modern  
27 contraceptives prevail. Training in contraceptive counselling should be implemented in order  
28 to increase women's access to evidence-based maternal health care services. Expanding the  
29 provider base to health care professionals other than physicians would further increase the  
30 availability of services.  
31  
32  
33  
34  
35  
36

## 37 **Contributor statement**

38  
39  
40 BE had the original idea of the study and developed the study protocol together with HO,  
41 KGD and MKA, whom developed the original questionnaire. HO entered the data and made  
42 first analysis together with SH who drafted the manuscript. All authors have contributed to  
43 writing and revising the final version of the manuscript and approved the submitted version.  
44  
45  
46  
47  
48  
49  
50  
51  
52  
53  
54

## Acknowledgements

The study was funded by the Faculty of Medicine, Uppsala University, Sweden and Sida (Swedish International Development Cooperation Agency). The data collection was made under a partner driven cooperation between Uppsala University and Ipas, New Delhi, India.

## Competing interests

The authors declare no competing interest

## Data sharing statement

There is no additional data available

## REFERENCES

- [1] Ahmed S, Li Q, Liu L, Tsui AO. Maternal deaths averted by contraceptive use: An analysis of 172 countries. *Lancet* 2012;380:111-25.
- [2] Collumbien M, Gerressu M, Cleland J. Non-use and use of ineffective methods of contraception. In: Ezzati M, Lopez AD, Rodgers A, Murray CJL, editors. *Comparative quantification of health risks: Global and regional burden of disease attributable to selected major risk factors*. Geneva: World Health Organization, 2004. p. 1255-320.
- [3] Marston C, Cleland J. Relationships between contraception and abortion: A review of the evidence. *Int Fam Plan Perspect* 2003;29:6-13.
- [4] Oringanje C, Meremikwu MM, Eko H, Esu E, Meremikwu A, Ehiri JE. Interventions for preventing unintended pregnancies among adolescents. *Cochrane Database Syst Rev* 2009:CD005215.
- [5] World Health Organization (WHO). *Unsafe abortion: global and regional estimates of the incidence of unsafe abortion and associated mortality in 2008*. 6th ed. Geneva: WHO, 2011.

1  
2  
3  
4  
5  
6  
7  
8  
9  
10  
11 [6] World Health Organization (WHO). Trends in maternal mortality: 1990 to 2010. Geneva:  
12 WHO, 2012.

13  
14 [7] Parliament of India. Medical termination of pregnancy act (MTP Act), Act No. 34 of  
15 1971. Revised version. Delhi: Commercial Law Publishers, 2010.

16  
17  
18 [8] Jejeebhoy SJ, Zavier AJF, Acharya R, Kalyanwala S. Increasing access to safe abortion in  
19 rural Maharashtra: Outcomes of a comprehensive abortion care model. New Delhi: Population  
20 Council, 2011.

21  
22 [9] Zavier AJ, Padmadas SS. Postabortion contraceptive use and method continuation in  
23 India. *Int J Gynaecol Obstet* 2012;118:65-70.

24  
25 [10] James KS. India's demographic change: opportunities and challenges. *Science*  
26 2011;333:576-80.

27  
28  
29 [11] International Institute for Population Sciences (IIPS) and Macro International. National  
30 family health survey (NFHS-3), 2005-06: India. Volume 1. Mumbai: IIPS, 2007.

31  
32 [12] Cottingham J, Germain A, Hunt P. Use of human rights to meet the unmet need for  
33 family planning. *Lancet* 2012;380:172-80.

34  
35 [13] Koenig MA. The impact of quality of care on contraceptive use: Evidence from  
36 longitudinal data from rural Bangladesh. Baltimore: Johns Hopkins University, 2003.

37  
38 [14] Curtis S, Evens E, Sambisa W. Contraceptive discontinuation and unintended pregnancy:  
39 An imperfect relationship. *Int Perspect Sex Reprod Health* 2011;37:58-66.

40  
41  
42 [15] Klingberg-Allvin M, Van Tam V, Nga NT, Ransjo-Arvidson A-B, Johansson A. Ethics  
43 of justice and ethics of care. Values and attitudes among midwifery students on adolescent  
44 sexuality and abortion in Vietnam and their implications for midwifery education: A survey  
45 by questionnaire and interview. *Int J Nurs Stud* 2007;44:37-46.

46  
47  
48 [16] Government of India, Ministry of Home Affairs. Census of India 2011.  
49 <<http://www.censusindia.gov.in/default.aspx>> Accessed 20/08/2012

50  
51 [17] Supe A, Burdick WP. Challenges and issues in medical education in India. *Acad Med*  
52 2006;81:1076-80.



- 1  
2  
3  
4  
5  
6  
7  
8  
9  
10  
11 [18] Spector PE. Summated rating scale construction. Sage University Paper Series on:  
12 Quantitative applications in the social sciences no 82. Newbury Park, CA: Sage, 1992.  
13
- 14 [19] Steinauer JE, Turk JK, Fulton MC, Simonson KH, Landy U. The benefits of family  
15 planning training: a 10-year review of the Ryan Residency Training Program. *Contraception*.  
16 2013 Feb 24; S0010-7824  
17
- 18 [20] Nath A: HIV/AIDS and Indian youth—a review of the literature (1980-2008). *SAHARA*  
19 *J* 2009;6:2-8.  
20
- 21 [21] Brown SS, Burdette L, Rodriguez P. Looking inward: Provider-based barriers to  
22 contraception among teens and young adults. *Contraception* 2008;78:355-7.  
23
- 24 [22] Campbell M, Sahin-Hodoglugil NN, Potts M. Barriers to fertility regulation: A review of  
25 the literature. *Stud Fam Plann* 2006;37(2):87-98.  
26
- 27 [23] Mbizvo MT, Chou D, Shaw D. Today's evidence, tomorrow's agenda: implementation of  
28 strategies to improve global reproductive health. *Int J Gynaecol Obstet*. 2013 May;121 Suppl  
29 1:S3-8.  
30
- 31 [24] Jacobstein R, Curtis C, Spieler J, Radloff S. Meeting the need for modern contraception:  
32 effective solutions to a pressing global challenge. *Int J Gynaecol Obstet*. 2013 May;121 Suppl  
33 1:S9-15.  
34
- 35 [25] Jejeebhoy SJ, Kalyanwala S, Mundle S, et al. Feasibility of expanding the medication  
36 abortion provider base in India to include ayurvedic physicians and nurses. *Int Perspect Sex*  
37 *Reprod Health* 2012;38:133-42.  
38
- 39 [26] Acharya R, Kalyanwala S. Knowledge, attitudes, and practices of certified providers of  
40 medical abortion: Evidence from Bihar and Maharashtra, India. *Int J Gynaecol Obstet*  
41 2012;118 Suppl 1:S40-6.  
42
- 43 [27] Harper CC, Brown BA, Foster-Rosales A, Raine TR. Hormonal contraceptive method  
44 choice among young, low-income women: How important is the provider? *Patient Educ*  
45 *Counsel* 2010;81:349-54.  
46  
47  
48  
49  
50  
51  
52  
53  
54  
55  
56  
57  
58  
59  
60

Table 1. Demographics of medical students in Maharashtra, India, 2011 (n = 1996). Data from 27 medical colleges (8 public, 19 private).

| Variable                  | n    | %    |
|---------------------------|------|------|
| Age                       |      |      |
| 20–24                     | 1886 | 94.4 |
| 25 and above              | 98   | 5.0  |
| Data missing              | 12   | 0.6  |
| Gender                    |      |      |
| Female                    | 860  | 43.1 |
| Male                      | 1134 | 56.8 |
| Data missing              | 2    | 0.1  |
| Place of birth/upbringing |      |      |
| Rural                     | 508  | 25.5 |
| Urban                     | 1444 | 72.3 |
| Data missing              | 44   | 2.2  |
| Religion                  |      |      |
| Hindu                     | 1747 | 87.7 |
| Muslim                    | 97   | 4.9  |
| Christian                 | 17   | 0.9  |
| Other                     | 133  | 6.7  |
| Data missing              | 2    | 0.1  |
| Marital status            |      |      |
| Single                    | 1970 | 98.7 |
| Married                   | 22   | 1.1  |
| Data missing              | 4    | 0.2  |
| Type of college           |      |      |
| Private                   | 1402 | 71.3 |
| Public                    | 556  | 28.7 |

Table 2. Perceptions of education and training in sexual and reproductive health among medical students (n = 1996) from private colleges (n = 1402) and public colleges (n = 556) in Maharashtra, India, 2011.

| Variable                                                                        | All<br>n (%) | Private<br>n (%) | Public<br>n (%) |
|---------------------------------------------------------------------------------|--------------|------------------|-----------------|
| Was sexual and reproductive health included in your curriculum?                 |              |                  |                 |
| Not at all                                                                      | 27 (1.4)     | 17 (1.2)         | 10 (1.8)        |
| Somewhat                                                                        | 468 (23.4)   | 352 (25.0)       | 116 (20.6)      |
| Sufficiently                                                                    | 1475 (73.9)  | 1039 (73.8)      | 436 (77.6)      |
| Data missing                                                                    | 26 (1.3)     |                  |                 |
| Have contraceptive methods been taught in your program?                         |              |                  |                 |
| Not at all                                                                      | 16 (0.8)     | 4 (0.3)          | 12 (2.1)        |
| Somewhat                                                                        | 199 (10.0)   | 143 (10.1)       | 56 (10.0)       |
| Sufficiently                                                                    | 1759 (88.1)  | 1265 (89.6)      | 494 (87.9)      |
| Data missing                                                                    | 22 (1.1)     |                  |                 |
| How do you assess your theoretical knowledge of sexual and reproductive health? |              |                  |                 |
| Poor                                                                            | 30 (1.5)     | 24 (1.7)         | 6 (1.1)         |
| Fair                                                                            | 552 (27.7)   | 381 (27.0)       | 171 (30.9)      |
| Good                                                                            | 1122 (56.2)  | 815 (57.8)       | 307 (55.4)      |
| Very good                                                                       | 260 (13.0)   | 190 (13.5)       | 70 (12.6)       |
| Data missing                                                                    | 32 (1.6)     |                  |                 |
| Have you had clinical practice in abortion care services during your training?  |              |                  |                 |
| Yes                                                                             | 268 (13.4)   | 196 (14.1)       | 72 (13.0)       |
| No                                                                              | 1678 (84.1)  | 1196 (85.9)      | 482 (87.0)      |
| Data missing                                                                    | 50 (2.5)     |                  |                 |

Table 3. Knowledge, attitudes, and perceptions on contraception among medical students (n = 1996) in Maharashtra, India, 2011.

| Statement                                                                            |   | Disagree Completely | Disagree | Neither | Agree | Agree completely | Missing |
|--------------------------------------------------------------------------------------|---|---------------------|----------|---------|-------|------------------|---------|
| Contraceptive pills might cause cancer                                               | n | 118                 | 267      | 170     | 1126  | 304              | 11      |
|                                                                                      | % | 5.9                 | 13.4     | 8.5     | 56.1  | 15.2             | 0.6     |
| Contraceptive pills can cause infertility                                            | n | 526                 | 857      | 227     | 349   | 25               | 12      |
|                                                                                      | % | 26.4                | 42.9     | 11.4    | 17.5  | 1.3              | 0.6     |
| Contraceptive pills are inconvenient to use                                          | n | 608                 | 855      | 236     | 249   | 38               | 10      |
|                                                                                      | % | 30.5                | 42.8     | 11.8    | 12.5  | 1.9              | 0.5     |
| Emergency contraceptive pills can be used several times a month                      | n | 972                 | 630      | 115     | 227   | 37               | 15      |
|                                                                                      | % | 48.7                | 31.6     | 5.8     | 11.4  | 1.9              | 0.8     |
| Condoms protect against STD/HIV                                                      | n | 30                  | 19       | 22      | 556   | 1361             | 8       |
|                                                                                      | % | 1.5                 | 1.0      | 1.1     | 27.9  | 68.2             | 0.4     |
| Traditional contraceptive methods (safe periods, withdrawal) are the best methods    | n | 647                 | 913      | 166     | 190   | 69               | 11      |
|                                                                                      | % | 32.4                | 45.7     | 8.3     | 9.5   | 3.5              | 0.6     |
| Contraceptive information should only be for married couples                         | n | 1305                | 566      | 57      | 41    | 20               | 7       |
|                                                                                      | % | 65.4                | 28.4     | 2.9     | 2.1   | 1.0              | 0.4     |
| Doctors working in abortion services have friendly attitudes towards unmarried women | n | 166                 | 346      | 559     | 695   | 215              | 15      |
|                                                                                      | % | 8.3                 | 17.3     | 28.0    | 34.8  | 10.8             | 0.8     |
| Married couples are shy to talk about contraception with each other                  | n | 150                 | 629      | 423     | 720   | 64               | 10      |
|                                                                                      | % | 7.5                 | 31.5     | 21.2    | 36.1  | 3.2              | 0.5     |
| Women feel confident discussing contraception with doctors                           | n | 86                  | 654      | 445     | 696   | 105              | 10      |
|                                                                                      | % | 4.3                 | 32.8     | 22.3    | 34.9  | 5.3              | 0.5     |
| Traditional values are barriers for sex education in India                           | n | 72                  | 137      | 116     | 939   | 722              | 10      |
|                                                                                      | % | 3.6                 | 6.9      | 5.8     | 47.0  | 36.2             | 0.5     |
| Sex education encourages unmarried people to have sex                                | n | 536                 | 824      | 329     | 232   | 68               | 7       |
|                                                                                      | % | 26.9                | 41.3     | 16.5    | 11.6  | 3.4              | 0.4     |

Table 4. Place of birth in relation to knowledge, attitudes and perceptions on contraception. Summary of significant differences among medical student's (n=1996) in Maharashtra, India, 2011.

| Statement                                                                            | Place of birth | Agree or agree completely<br>n <sup>a</sup> (%) | 95% Confidence Interval |
|--------------------------------------------------------------------------------------|----------------|-------------------------------------------------|-------------------------|
| Contraceptive pills might cause cancer                                               | Rural          | 344 (66.4)                                      | 62.2–70.5               |
|                                                                                      | Urban          | 1081 (74.1)                                     | 71.8–76.4               |
| Doctors working in abortion services have friendly attitudes towards unmarried women | Rural          | 289 (55.9)                                      | 51.5–60.2               |
|                                                                                      | Urban          | 617 (42.4)                                      | 39.8–45.0               |
| Sex education encourages unmarried people to have sex                                | Rural          | 105 (20.2)                                      | 16.9–24.0               |
|                                                                                      | Urban          | 193 (13.2)                                      | 11.5–15.1               |

<sup>a</sup>Number of students does not always total 1996 due to missing answers

Table 5. Comparison of male and female medical interns' knowledge, attitudes, and perceptions towards contraception (n = 1996) in Maharashtra, India, 2011.

| Statement                                                                                   | Sex | Agree or agree completely<br>n <sup>a</sup> (%) | 95% Confidence Interval |
|---------------------------------------------------------------------------------------------|-----|-------------------------------------------------|-------------------------|
| <b>Contraceptive pills might cause cancer<sup>b</sup></b>                                   | F   | <b>652 (77.1)</b>                               | <b>74.1–79.9</b>        |
|                                                                                             | M   | <b>753 (68.0)</b>                               | <b>65.2–70.8</b>        |
| Contraceptive pills can cause infertility                                                   | F   | 150 (17.7)                                      | 15.2–20.4               |
|                                                                                             | M   | 216 (19.5)                                      | 17.2–22.0               |
| Contraceptive pills are inconvenient to use                                                 | F   | 132 (15.6)                                      | 13.2–18.2               |
|                                                                                             | M   | 149 (13.4)                                      | 11.5–15.6               |
| <b>Emergency contraceptive pills can be used several times a month</b>                      | F   | <b>76 (9.0)</b>                                 | <b>7.2–11.1</b>         |
|                                                                                             | M   | <b>182 (16.5)</b>                               | <b>14.3–18.8</b>        |
| <b>Condoms protect against STD/HIV</b>                                                      | F   | <b>830 (97.9)</b>                               | <b>96.7–98.7</b>        |
|                                                                                             | M   | <b>1056 (95.3)</b>                              | <b>93.9–96.5</b>        |
| Traditional contraceptive methods (safe periods, withdrawal) are the best methods           | F   | 90 (10.7)                                       | 8.7–12.9                |
|                                                                                             | M   | 163 (14.7)                                      | 12.7–16.9               |
| Contraceptive information should only be for married couples                                | F   | 22 (2.6)                                        | 1.6–3.9                 |
|                                                                                             | M   | 37 (3.3)                                        | 2.4–4.6                 |
| <b>Doctors working in abortion services have friendly attitudes towards unmarried women</b> | F   | <b>326 (38.5)</b>                               | <b>35.2–41.9</b>        |
|                                                                                             | M   | <b>569 (51.4)</b>                               | <b>48.4–54.4</b>        |
| Married couples are shy to talk about contraception with each other                         | F   | 311 (36.7)                                      | 33.5–40.1               |
|                                                                                             | M   | 462 (41.7)                                      | 38.8–44.7               |
| Women feel confident discussing contraception with doctors                                  | F   | 350 (41.3)                                      | 37.9–44.7               |
|                                                                                             | M   | 438 (39.5)                                      | 36.6–42.5               |
| Traditional values are barriers for sex education in India                                  | F   | 718 (84.8)                                      | 82.2–87.1               |
|                                                                                             | M   | 920 (83.0)                                      | 80.6–85.1               |
| <b>Sex education encourages unmarried people to have sex</b>                                | F   | <b>88 (10.4)</b>                                | <b>8.4–12.6</b>         |
|                                                                                             | M   | <b>209 (18.8)</b>                               | <b>16.6–21.3</b>        |

<sup>a</sup>Number of students does not always total 1996 due to missing answers

<sup>b</sup>**Bold** indicates significant differences

1  
2  
3  
4  
5  
6  
7  
8  
9  
10  
11  
12  
13  
14  
15  
16  
17  
18  
19  
20  
21  
22  
23  
24  
25  
26  
27  
28  
29  
30  
31  
32  
33  
34  
35  
36  
37  
38  
39  
40  
41  
42  
43  
44  
45  
46  
47  
48  
49  
50  
51  
52  
53  
54  
55  
56  
57  
58  
59  
60

Title: ~~Medical students' Future physicians'~~ knowledge, attitudes, and perceptions on  
contraceptive use and counselling: a cross-sectional survey ~~among medical interns students~~ in  
Maharashtra, India

Sara Hogmark, MD, Dept. of Obstetrics and Gynaecology, Falu County Hospital, Falun,  
Sweden; Dept. of Women's and Children's Health (IMCH), Uppsala University, Sweden

Marie Klingberg-Allvin, Senior Lecturer, Dept. of Women's and Children's Health, Uppsala  
University; Dept. of Women's and Children's Health, Karolinska Institutet; School of Social  
and Health Science, Dalarna University, Sweden

Hannes Ohlsson, MD, Dept. of Women's and Children's Health (IMCH), Uppsala University,  
Sweden

Kristina Gemzell-Danielsson, Professor, Dept. of Women's and Children's Health,  
Karolinska Institutet, Sweden

Birgitta Essén, Asst. Prof., Dept. of Women's and Children's Health (IMCH), Uppsala  
University, Sweden

Corresponding Author: Sara Hogmark, Dept. of Obstetrics and Gynaecology, Falu County  
Hospital, 79182 Falun, Sweden

Phone: 046-(0)23-492000 E-mail: [sara.hogmark@ltdalarna.se](mailto:sara.hogmark@ltdalarna.se)

Keywords: contraceptives, medical students, India, reproductive health, cross sectional survey

Word count: ~~24802861~~ (excluding abstract and references)

1

Formatted: French (France)

Field Code Changed

Formatted: French (France)

Formatted: French (France)

### Article focus

Contraceptive use is an effective primary prevention strategy to avoid unintended pregnancies and unsafe abortions and thus reduces maternal mortality and morbidity.

This study aimed to investigate knowledge, attitudes and perceptions on contraceptive use and counselling among medical students future physicians in Maharashtra, India.

### Key message points

Despite mostly positive attitudes towards modern contraceptives, sex education, and family planning counselling, medical students future physicians in Maharashtra have fair knowledge and show misconceptions about modern contraceptives, and lack training in family planning services.

Respondents expressed a desire to provide sexual and reproductive health services to people regardless of their marital status.

Pre and in service training in evidence based contraceptive counselling should be implemented in order to increase the access to comprehensive family planning services decrease unplanned pregnancies and unsafe abortions in India.

### Strengths and Limitations

This study contributes with important evidence that may be used to revise pre and in service training in contraceptive counselling and thus reduce maternal mortality related to unintended pregnancies in India.

Important limitation with this study is the non probability sampling technique applied and this might reduce the external validity.

The large sample size and the high proportion of the total number and the presence of medical interns students from public and private medical schools in both urban and semi urban settings strengthen the generalizability.



## ABSTRACT

*Objectives:* This study aimed to investigate knowledge, attitudes and perceptions on contraceptive use and counselling among medical students in Maharashtra, India.

*Setting: Background:* Considerable global maternal mortality and morbidity could be avoided through the use of effective contraception. In India, contraception services are frequently unavailable or there are obstacles to obtaining modern, reversible contraceptives. ~~This study aimed to investigate knowledge, attitudes and perceptions on contraceptive use and counselling among medical students future physicians in Maharashtra, India.~~

*Participants Study design:* A cross-sectional descriptive study using a self-administered questionnaire was conducted among 1996 medical ~~interns students~~ in their fifth year of study at 27 medical colleges in the state of Maharashtra, India. Descriptive and analytical statistics interpreted the survey instrument and significant results were presented with a 95% confidence interval.

*Results:* Respondents expressed the desire to provide contraceptive services ~~and individual counselling.~~ ~~Few had experienced training in abortion care.~~ ~~They had a fair knowledge of contraception, but showed some~~ There were misconceptions about modern contraceptive methods and the impact of sex education. Attitudes towards contraception were mainly positive, pre-marital counselling was supported, and the influence of traditional values and negative provider attitudes on services was recognized. Gender, area of upbringing, and type of medical college did not change the results.

*Conclusions:* Despite mostly positive attitudes towards modern contraceptives, sex education, and family planning counselling, future physicians in Maharashtra have fair knowledge and show misconceptions about modern contraceptives and myths prevail. Pre- and in-service training in contraceptive counselling should be implemented in order to increase women's access to evidence-based maternal health care services. ~~Pre and in service training of providers in evidence based contraceptive counselling would decrease unplanned pregnancies and reduce unsafe abortions in the region studied.~~ Expanding the provider base to health care professionals other than physicians would further increase the availability of services.

Formatted: Line spacing: single

Formatted: Font: Italic

Formatted: Font: Italic

### **Article focus**

Contraceptive use is an effective primary prevention strategy to avoid unintended pregnancies and unsafe abortions and thus reduces maternal mortality and morbidity.

This study aimed to investigate knowledge, attitudes and perceptions on contraceptive use and counselling among medical students in Maharashtra, India.

### **Key message points**

Despite mostly positive attitudes towards modern contraceptives, sex education, and family planning counselling, medical students in Maharashtra show misconceptions about modern contraceptives, and lack training in family planning services.

Respondents expressed a desire to provide sexual and reproductive health services to people regardless of their marital status.

Pre- and in-service training in evidence-based contraceptive counselling should be implemented in order to increase the access to comprehensive family planning services in India.

### **Strengths and Limitations**

This study contributes with important evidence that may be used to revise pre- and in service training in contraceptive counselling and thus reduce maternal mortality related to unintended pregnancies in India.

Important limitation with this study is the non-probability sampling technique applied and this might reduce the external validity.

The large sample size and the high proportion of the total number and the presence of medical students from public and private medical schools in both urban and semi-urban settings strengthen the generalizability.

1  
2  
3  
4  
5  
6  
7  
8  
9  
10  
11  
12  
13  
14  
15  
16  
17  
18  
19  
20  
21  
22  
23  
24  
25  
26  
27  
28  
29  
30  
31  
32  
33  
34  
35  
36  
37  
38  
39  
40  
41  
42  
43  
44  
45  
46  
47  
48  
49  
50  
51  
52  
53  
54  
55  
56  
57  
58  
59  
60

## INTRODUCTION

Contraceptive use is an effective primary prevention strategy for reducing maternal mortality [1]. It has been estimated that the use of effective contraception could avert 90% of abortion-related and more than 20% of obstetric-related mortality globally [2]. Abortion incidence is inversely associated with the level of contraceptive use, especially where fertility rates are stable [3]. In addition, comprehensive sex education has the potential to prevent unintended pregnancies that lead to unsafe abortions [4]. ~~The growing number of people of reproductive age in developing countries poses a challenge for family planning programmes and health care services.~~ In order to meet the increasing demand for contraceptives and ensure the sexual and reproductive health and rights of women, including the right to planned parenthood, intensified efforts are urgently needed [5].

India accounts for 20% of maternal deaths worldwide. ~~Every year, nearly 60,000 women in India die from complications related to pregnancy~~ [6]. ~~Approximately 6.7 million induced abortions take place in India annually.~~ Despite the fact that induced abortion has been legal in India since 1971 [7], most ~~of the approximately 6.7 million annually induced~~ abortions are performed in an unsafe manner ~~and put women's health and lives at risk~~ [7, 8]. Moreover, a recent study concluded that 70% of all Indian women who have an abortion do not use post-abortion contraception [9]. The unmet need for ~~family planning among married women is 14%.~~ ~~The overall unmet need for~~ modern contraceptives is 22% in the cities and higher in rural areas. ~~Among married women in India, 56% use some form of contraception and 49% use a modern method.~~ Female sterilization is the most common contraceptive practice and accounts for 75% of all methods used [10]. The use of reversible, modern methods in order to postpone birth of a first child or for spacing births is infrequent: ~~male condoms are used by 5%, the pill 3%, IUD 2%, injection 1%, and male sterilisation 1%~~ [11].

Some of the barriers that impede women's access to contraception are health care providers who are inadequately trained, insufficient in number, and poorly supervised [12]. Studies have shown that improving quality of care increases and sustains contraceptive use by women

1  
2  
3  
4  
5  
6  
7  
8  
9  
10  
11 [13]. Providers need adequate knowledge of contraceptive methods and training in  
12 counselling skills in order to provide reliable information to women ~~to avoid unintended~~  
13 ~~pregnancy~~ [14]. Despite the availability of effective methods of contraception in India, many  
14 pregnancies remain ~~unplanned and~~ unintended. Considering the future role of medical  
15 ~~students and interns~~ students as contraceptive counsellors, little is known about their views on  
16 contraceptive methods, use or counselling. This study aimed to investigate knowledge,  
17 attitudes, -and perceptions on contraceptive use and counselling among medical students  
18 ~~future physicians~~ in Maharashtra, India.  
19  
20  
21  
22  
23  
24  
25  
26  
27  
28  
29  
30  
31  
32  
33  
34  
35  
36  
37  
38  
39  
40  
41  
42  
43  
44  
45  
46  
47  
48  
49  
50  
51  
52  
53  
54  
55  
56  
57  
58  
59  
60

1  
2  
3  
4  
5  
6  
7  
8  
9  
10  
11  
12  
13  
14  
15  
16  
17  
18  
19  
20  
21  
22  
23  
24  
25  
26  
27  
28  
29  
30  
31  
32  
33  
34  
35  
36  
37  
38  
39  
40  
41  
42  
43  
44  
45  
46  
47  
48  
49  
50  
51  
52  
53  
54  
55  
56  
57  
58  
59  
60

## MATERIALS AND METHODS

In February 2011, a cross-sectional survey was conducted using a pre-tested, self-administered questionnaire in the Indian state of Maharashtra among 1,996 medical students in their fifth year (internship) of training [15]. Out of a total of 43 medical colleges in Maharashtra (5,195 students), 19 are Public (2,200 students). A convenience sample of 27 colleges (8 government public, 55673 students; 19 private, 1,40223 students) was included in the study. All medical interns students at the selected institutions were asked to participate before attending they were to take a lecture pre-service CAC orientation program in comprehensive abortion care (CAC). The lecture was The CAC program was organized by a non-governmental organization organized but part of within the within the medical ir- educationnal and training program and organized by an NGO. In the State of Maharashtra out of 43 medical colleges (5195 students) 19 are Public (2200 students). In total 27 colleges (8- public, 19 private) were included in the study and 1423 and 573 students participated from private and public colleges respectively.

Formatted: Font: No underline, Font color: Auto

Formatted: Font: No underline

Formatted: Font: No underline, Font color: Auto

### Study setting

Maharashtra is located in west-central India. It Maharashtra is the country's second most populous state and the third largest by area. Of its 112 million inhabitants, a slight majority live in rural areas. Mumbai, India's largest city, is the capital of the state. Maharashtra's socio-economic status, literacy rate, and health infrastructure are better than the national average [16]. Medical education in India is regulated by the Medical Council of India and is either public or private. Medical education consists of 4.5 years of theoretical studies followed by one year of internship. According to the national medical education curriculum for medical education the theoretical studies should cover both comprehensive abortion care, as well as CAC and contraceptive methods, and counselling, which includes a two-month rotation in obstetrics/gynaecology and three months of community medicine [17].

### Instrument

1  
2  
3  
4  
5  
6  
7  
8  
9  
10  
11 The questionnaire contained three sections. Section 1 included socio-demographic  
12 characteristics as gender, age, religion, marital status, place of birth/area of upbringing, and  
13 type of college. Section 2 included questions related to perception of education and training in  
14 sexual and reproductive health~~previous coursework and training~~, and respondents' assessment  
15 of their knowledge regarding the medical curriculum and questions concerning perceptions of  
16 contraceptive methods and services.  
17  
18  
19

20  
21 Section 3 consisted of twelve statements on different aspects of contraceptive methods,  
22 services, and values surrounding sexual and reproductive health. Participants were asked to  
23 circle the most appropriate alternative on a five-point Likert scale (Disagree  
24 completely/Disagree/Neither agree nor disagree/Agree/Agree completely) [18].  
25  
26

### 27 **Statistical analysis**

28  
29  
30 Questionnaires that contained one or more answers were included in the analysis. Statistical  
31 Package for Social Studies (SPSS) 20.0 software was used. Descriptive statistics were applied  
32 to all sections of the questionnaire; actual numbers and proportions were calculated; and  
33 cross-tabulations with intergroup comparisons of answers were made for ~~interns-students~~ of  
34 different genders, types of colleges, and places of birth. The alternatives 'agree' and 'agree  
35 completely' were aggregated, as well as the alternatives 'disagree' and 'disagree completely'.  
36 Any difference with a 95% confidence interval (CI) was regarded as significant.  
37  
38  
39

### 40 **Ethical considerations**

41  
42  
43 The study was carried out in compliance with the principles of the World Medical Association  
44 Declaration of Helsinki. The medical ~~interns-students~~ eligible for participation in the study  
45 were given oral information about the study and were informed that participation was  
46 anonymous and voluntary and that choosing not to participate would not affect their studies or  
47 future careers negatively. By filling in the questionnaire written consent to participation was  
48 given. Permission to conduct the survey in connection with the training programme was  
49  
50  
51

1  
2  
3  
4  
5  
6  
7  
8  
9  
10  
11 obtained from the principal at each college. The study has been approved by the research  
12 ethical committee at Karolinska Institutet (Dnr: 2013/415-31/4).

Formatted: Font: English (U.S.)

## 14 15 RESULTS

16  
17 Out of 2,006 questionnaires, 1,996 were at least partially filled-in, making the overall  
18 response rate 99.5%. The demographic characteristics of the ~~interns~~students are outlined in  
19 Table 1. Since the ~~interns~~students were homogenous in terms of age, religion, and marital  
20 status, the variables remaining for inter-group comparisons were gender (56.87% male, 43.1%  
21 female), place of birth (72.3% urban, 25.5% rural), and type of college (71.3% private,  
22 28.79% public).  
23  
24  
25  
26

27 Table 2 shows the ~~students' perception of education and training in sexual and reproductive~~  
28 ~~health, and respondents' assessment of their knowledge regarding contraceptive methods and~~  
29 ~~services.~~ ~~interns' students' perceptions on coursework and training on sexual and reproductive~~  
30 ~~health, and their own assessment of knowledge.~~ Most of the ~~interns~~students thought that the  
31 topic of reproductive health had been adequately covered in their curriculum, including  
32 contraceptive methods. A majority considered their theoretical knowledge in sexual and  
33 reproductive health fair or good. A large proportion reported having had no clinical practice  
34 in abortion care services during their training. A comparison between ~~interns~~students from  
35 private and public colleges revealed no significant differences.  
36  
37  
38  
39  
40

41 With regard to contraceptive counselling, 74.0% believed it should be given individually and  
42 not in a group. A majority of the respondents (67.2%) thought doctors should be the ones to  
43 provide contraception to patients, while 27.1% considered health workers to be the most  
44 appropriate counsellors. A few ~~interns~~students chose other alternatives (nurse 3.0%, other  
45 1.6%, missing 1.1%). A majority (95.1%) indicated they would like to have responsibility for  
46 providing information on contraception as future doctors. Regarding the use of oral  
47 contraceptives, 88.59% of the ~~interns~~students stated they should be taken every day. Some  
48 ~~interns~~students (5.86%) thought they were to be taken after intercourse or once a month  
49  
50  
51  
52

(3.4%). A cross-sectional analysis of answers given by interns-students with rural versus urban places of birth revealed no significant differences with regard to contraceptive-counsellingthese results. However, those from private colleges preferred individual contraceptive counselling over group counselling (private college interns-students 78.2%, CI 95%, 75.9–80.3; public college interns-students 70.64%, CI 95%, 66.6–74.4). Female interns-students were also more supportive of individual counselling than males (females 80.2%, CI 95%, 77.4–82.9; males 72.83%, CI 95%, 70.1–75.4). Females also expressed a greater interest in having responsibility for providing contraceptive information as future doctors than males (females 98.2%, CI 95%, 96.8–98.8; males 95.3% CI, 93.8–96.4). Moreover, female interns-students were better informed on the daily intake of oral contraceptive pills than males (females 93.3%, CI 95%, 91.5–94.9; males 88.89%, CI 95%, 86.8–90.6).

The knowledge, attitudes, and perceptions of medical interns-students on contraceptive methods, services, and values surrounding sexual and reproductive health are shown in Table

3. Cross-sectional analysis comparing interns-students from public and private colleges indicated a difference of opinion regarding the statement “Doctors working in abortion service have friendly attitudes towards unmarried women”. Fewer interns-students from private colleges agreed or agreed completely as compared to interns-students from public colleges (private college interns-students 43.84%, CI 95%, 41.8–46.4; public college interns-students 51.2%, CI 95%, 47.0–51.4).

Table 4 summarizes the significant differences in perceptions found among internsstudents based on their place. A comparison of the answers based on the interns' place-of birth (urban or rural) revealed significant differences in responses to three statements: InternsStudents with urban place of birth to a higher extent agreed to that “Contraceptive pills might cause cancer” (urban 74.1%, CI 95%, 71.8–76.4; rural 66.4%, CI 95%, 62.2–70.5); A larger proportion of internsstudents with rural background agreed to the statement that “Doctors working in abortion service have friendly attitudes towards unmarried women” (rural 55.9%, CI 95%, 51.6-60.2; urban 42.4, CI 95%, 39.8– 45.0); and it was more common for internsstudents with rural place of birth to agree to the statement “Sex education encourages



unmarried people to have sex” (rural 20.2%, CI 95%, 16.9–24.0; urban 13.2, CI 95%, 11.5–15.1) (Table 4).

Table 5 compares male and female medical ~~interns’ students’~~ knowledge, attitudes, and perceptions on contraception. More female ~~interns students~~ agreed or agreed completely that contraceptive pills might cause cancer. Males tended to believe that emergency contraceptive pills may be used several times a month. Both male and female ~~interns students~~ largely agreed or agreed completely that condoms protect against sexually transmitted diseases (STD) and HIV, although females were significantly more supportive of their use. One in five males versus one in ten females agreed or agreed completely that sex education encourages unmarried people to have sex. Among males, 51.40% agreed or agreed completely that doctors working in abortion services have friendly attitudes towards unmarried women, compared to 38.59% among females.

## DISCUSSION

~~The major finding in this study is the inadequate level of education and training in CAC comprehensive abortion care and contraceptive methods counselling although the of medical students’s who already have undertaken passed the full theoretical parts of the their program medical education. Our findings further suggest that even though although the medical interns students surveyed had experienced little training in abortion care services, they expressed a clear interest in disseminating contraceptive information as future physicians. Although they had mostly a fair knowledge and a positive attitudes toward contraception and pre-marital counselling, they also had misconceptions about modern contraceptive methods and the impact of sex education were common.~~

~~Recent studies indicate that family planning training during residency improves future physicians’ proficiency in contraceptive counselling [19]. Few had experienced clinical training in abortion care services. They recognized the influence of traditional values and~~

Formatted: Font: Not Italic

Formatted: Font: Not Italic, English (U.S.)

~~negative provider attitudes regarding contraceptive services, and they expressed a clear interest in disseminating contraceptive information as future physicians.~~

~~Very few respondents in our study had had any clinical experience in abortion care services, yet a majority thought the topics of sexual and reproductive health and contraceptive methods had been adequately covered in their coursework. Still, nearly one in five interns falsely believed that contraceptive pills can cause infertility and one in ten did not know that contraceptive pills are to be taken on a daily basis. More females than males were unaware that emergency contraceptive pills may be used several times a month. A majority of both males and females perceived that contraceptive pills might cause cancer, although females were more likely to agree on this. Recent studies indicate that family planning training during residency improves future physicians' proficiency in contraceptive counselling [19]. Recent studies indicate that family planning training during residency improves future physicians' proficiency in both uterine evacuation and contraceptive counselling [19].~~

Our findings did not reveal any differences in self-rated or theoretical knowledge between public and private college ~~interns~~ students. The background factor that had the greatest influence on knowledge was gender. Female ~~interns~~ students were better informed about the ~~dosage utilisation~~ of oral contraceptives and the protection that condoms offer against STD/HIV. They also report that sex education does not encourage unmarried people to have sex. Regardless of demographic background, most ~~interns~~ students in our study recognized that traditional values are barriers to sex education. Few thought contraceptive information should only be provided to married couples, although ~~interns~~ students born in rural areas had more negative perceptions of sex education. The socio-cultural norms of Indian society contribute to making sex-related issues taboo and hinder young people from seeking counselling regarding sexual health. ~~At the same time, premarital sex is increasing among Indian youth [20]. Indian women have limited power to decide about birth control. The preference for a male child, which still strongly prevails in India, also has an influence on reproductive behaviour. Reducing such a preference would require a change in social norms and an improvement in the status of women [32]. Two recent studies from rural India may~~

1  
2  
3  
4  
5  
6  
7  
8  
9  
10  
11  
12  
13  
14  
15  
16  
17  
18  
19  
20  
21  
22  
23  
24  
25  
26  
27  
28  
29  
30  
31  
32  
33  
34  
35  
36  
37  
38  
39  
40  
41  
42  
43  
44  
45  
46  
47  
48  
49  
50  
51  
52  
53  
54  
55  
56  
57  
58  
59  
60

~~indicate a change in attitude. In the first, nearly one third of young married women without children were found to be using contraceptives [23]. The second study found growing autonomy among young couples in using contraception to space births, even when this conflicted with the views of their mothers in law [33]. Although comprehensive sex education has been shown to have a positive impact on young people's risky sexual behaviour [21], in parts of India sex education has been banned in schools [20]. Young people in India have expressed a desire for formal sex education and doctors are their preferred source of advice [22]. India is known to have negative attitudes toward pre-marital sex and a reluctance to provide married couples with contraceptives before they have had at least one child [23].~~

~~Other research reveals that health care providers often impose unnecessary barriers in dispensing contraceptives, including denial of a contraceptive method on the basis of age, parity, marital status, or lack of parental or spousal authorization [214, 225]. A review of studies from developing countries indicates a similar pattern [25]. One in four respondents in our study did not believe doctors working in abortion services held positive attitudes towards unmarried women. However, as noted above, most interns supported providing contraceptive information to unmarried couples.~~

~~Females expressed a slightly greater interest in working with contraceptive services in their medical practice than males. Although nearly all interns-students in our survey said they would like to assume the responsibility for contraceptive counselling in their future careers, the current shortage of providers (especially in rural areas) may require the shifting of tasks.~~

~~Task sharing or sharing and task-shifting within family planning services is recommended by the World Health Organization WHO [236]. The involvement of clinical officers, midwives and nurses increases the equitable access to modern contraception among women in low resource settings [247]. The fact that one-fourth of our respondents believed that health workers, rather than physicians, were best suited to dispense contraceptive information suggests that future physicians-doctors would be willing to relegate such tasks to others. This might overcome the present inequalities in access to reproductive health services in India [28].~~

1  
2  
3  
4  
5  
6  
7  
8  
9  
10  
11 A recent study suggests that the inclusion of nurses, midwives, and ayurvedic physicians in  
12 medical abortion care is feasible in India [29]. Broadening of the provider base for family  
13 planning services would be a pragmatic response to the current shortage especially in rural  
14 area of India. Several studies conclude that even though abortion providers discuss  
15 contraception with their patients and advise them about a range of methods, it is common for  
16 patients to refuse any form of contraception following an abortion [2530, 2631]. Indian  
17 women have limited power to decide about birth control. The preference for a male child,  
18 which still strongly prevails in India, also has an influence on reproductive behaviour.  
19 Reducing such a preference would require a change in social norms and an improvement in  
20 the status of women [32]. Two recent studies from rural India may indicate a change in  
21 attitude. In the first, nearly one third of young married women without children were found to  
22 be using contraceptives; 10% were using condoms to postpone having their first child [23].  
23 The second study found growing autonomy among young couples in using contraception to  
24 space births, even when this conflicted with the views of their mothers-in-law [33].  
25  
26  
27  
28  
29  
30  
31

32 The quality of provider counselling and patient education is important for the successful  
33 integration of new hormonal methods of contraception into clinical practice [2734]. Medical  
34 students need training in comprehensive sexual and reproductive health services should that  
35 conforms with international human rights standards and include respect for privacy and  
36 confidentiality, in order to provide full and accurate information to their future patients, and  
37 ensure free and informed consent [11].  
38  
39  
40  
41

42 India has one of the most privatized medical systems in the world. The public system, which  
43 provides health care for the poor, employs only two physicians and eight nurses per 10,000  
44 population [35]. The strategic use of nurses and midwives has been described to contribute to  
45 mitigating human resource problems in emergency obstetric and gynecological care [36].  
46 There is evidence from developing countries that trained nurses and midwives can replace  
47 doctors in many settings [37], yet medical doctors are still the dominant providers of  
48 contraceptive services in India. Strategies' identified to cover critical gaps in access to  
49 reproductive health are: integrated family planning with postpartum and abortion care, pre-  
50  
51  
52  
53  
54

1  
2  
3  
4  
5  
6  
7  
8  
9  
10  
11  
12  
13  
14  
15  
16  
17  
18  
19  
20  
21  
22  
23  
24  
25  
26  
27  
28  
29  
30  
31  
32  
33  
34  
35  
36  
37  
38  
39  
40  
41  
42  
43  
44  
45  
46  
47  
48  
49  
50  
51  
52  
53  
54  
55  
56  
57  
58  
59  
60

~~and in-service training on evidence based contraception and task shift and sharing between physicians and midwives and nurses [38].~~

## METHODOLOGICAL CONSIDERATIONS

One weakness is the non-probability sampling technique applied in our study and this might reduce the external validity. The large sample size and the fact that a fairly high proportion of the total number of students in both private (47.550%) and public (26.0%) colleges is included are thought to strengthen the validity. However, since India is a country with large regional differences in socioeconomic and health status, our results may not be representative of all medical ~~interns students~~ in the country. On the other hand, the presence of ~~interns students~~ from public and private medical schools in both urban and semi-urban settings may strengthen the generalizability for Maharashtra. The method of using anonymous questionnaires is suitable for sensitive topics like sexual and reproductive health. The reliability and validity of the survey is strengthened through previous testing of the instrument.

## CONCLUSIONS

We have found positive and negative attitudes towards modern contraceptive methods, sex education, and family planning counselling among future physicians in India. There has been a willingness to offer sexual and reproductive health services to people regardless of their marital status. ~~Despite positive attitudes towards modern contraceptives, sex education, and family planning counselling~~ Still, future physicians in Maharashtra have fair knowledge and ~~misconceptions about modern contraceptives and myths prevail.~~ Pre and in-service training in contraceptive counselling should be implemented in order to increase women's access to evidence-based maternal health care services. Expanding the provider base to health care professionals other than physicians would further increase the availability of services.

~~Pre and in-service training in evidence based contraceptive counselling would decrease unplanned pregnancies and unsafe abortions in India. Expansion of the provider base to~~

~~include categories of health care staff other than physicians as purveyors of contraceptive information could increase access to services.~~

### Contributor statement

BE had the original idea of the study and developed the study protocol together with HO, KGD and MKA, whom developed the original questionnaire. HO entered the data and made first analysis together with SH who wrote the first draft. All authors contributed to the final version of the manuscript.

### Acknowledgements

The study was funded by the Faculty of Medicine, Uppsala University, [Sweden](#) and Sida (Swedish International Development Cooperation Agency). The data collection was made under ~~the a partner driven~~ cooperation between Uppsala University and Ipas, New Delhi, India.

### Competing interests

The authors declare no competing interests

### Data sharing statement

There is no additional data available

### REFERENCES

- [1] Ahmed S, Li Q, Liu L, Tsui AO. Maternal deaths averted by contraceptive use: An analysis of 172 countries. *Lancet* 2012;380:111-25.
- [2] Collumbien M, Gerressu M, Cleland J. Non-use and use of ineffective methods of contraception. In: Ezzati M, Lopez AD, Rodgers A, Murray CJL, editors. *Comparative quantification of health risks: Global and regional burden of disease attributable to selected major risk factors*. Geneva: World Health Organization, 2004. p. 1255-320.

1  
2  
3  
4  
5  
6  
7  
8  
9  
10  
11  
12  
13  
14  
15  
16  
17  
18  
19  
20  
21  
22  
23  
24  
25  
26  
27  
28  
29  
30  
31  
32  
33  
34  
35  
36  
37  
38  
39  
40  
41  
42  
43  
44  
45  
46  
47  
48  
49  
50  
51  
52  
53  
54  
55  
56  
57  
58  
59  
60

[3] Marston C, Cleland J. Relationships between contraception and abortion: A review of the evidence. *Int Fam Plan Perspect* 2003;29:6-13.

Formatted: German (Germany)

[4] Oringanje C, Meremikwu MM, Eko H, Esu E, Meremikwu A, Ehiri JE. Interventions for preventing unintended pregnancies among adolescents. *Cochrane Database Syst Rev* 2009:CD005215.

Formatted: German (Germany)

Formatted: German (Germany)

[5] World Health Organization (WHO). *Unsafe abortion: global and regional estimates of the incidence of unsafe abortion and associated mortality in 2008*. 6th ed. Geneva: WHO, 2011.

[6] World Health Organization (WHO). *Trends in maternal mortality: 1990 to 2010*. Geneva: WHO, 2012.

[7] Parliament of India. *Medical termination of pregnancy act (MTP Act), Act No. 34 of 1971*. Revised version. Delhi: Commercial Law Publishers, 2010.

[8] Jejeebhoy SJ, Zavier AJF, Acharya R, Kalyanwala S. *Increasing access to safe abortion in rural Maharashtra: Outcomes of a comprehensive abortion care model*. New Delhi: Population Council, 2011.

[9] Zavier AJ, Padmadas SS. Postabortion contraceptive use and method continuation in India. *Int J Gynaecol Obstet* 2012;118:65-70.

[10] James KS. India's demographic change: opportunities and challenges. *Science* 2011;333:576-80.

[11] International Institute for Population Sciences (IIPS) and Macro International. *National family health survey (NFHS-3), 2005-06: India. Volume 1*. Mumbai: IIPS, 2007.

[12] Cottingham J, Germain A, Hunt P. Use of human rights to meet the unmet need for family planning. *Lancet* 2012;380:172-80.

[13] Koenig MA. *The impact of quality of care on contraceptive use: Evidence from longitudinal data from rural Bangladesh*. Baltimore: Johns Hopkins University, 2003.

[14] Curtis S, Evens E, Sambisa W. Contraceptive discontinuation and unintended pregnancy: An imperfect relationship. *Int Perspect Sex Reprod Health* 2011;37:58-66.

[15] Klingberg-Allvin M, Van Tam V, Nga NT, Ransjo-Arvidson A-B, Johansson A. Ethics of justice and ethics of care. Values and attitudes among midwifery students on adolescent sexuality and abortion in Vietnam and their implications for midwifery education: A survey by questionnaire and interview. *Int J Nurs Stud* 2007;44:37-46.

[16] Government of India, Ministry of Home Affairs. Census of India 2011. <<http://www.censusindia.gov.in/default.aspx>> Accessed 20/08/2012

[17] Supe A, Burdick WP. Challenges and issues in medical education in India. *Acad Med* 2006;81:1076-80.

[18] Spector PE. Summated rating scale construction. Sage University Paper Series on: Quantitative applications in the social sciences no 82. Newbury Park, CA: Sage, 1992.

[19] Steinauer JE, Turk JK, Fulton MC, Simonson KH, Landy U. The benefits of family planning training: a 10-year review of the Ryan Residency Training Program. *Contraception*. 2013 Feb 24; S0010-7824

Formatted: German (Germany)

[20] Nath A: HIV/AIDS and Indian youth—a review of the literature (1980-2008). *SAHARA J* 2009;6:2-8.

~~[21] Kirby DB, Laris BA, Roller LA. Sex and HIV education programs: Their impact on sexual behaviors of young people throughout the world. *J Adoles Health* 2007;40:206-17.~~

~~[22] Benzaken T, Palep AH, Gill PS. Exposure to and opinions toward sex education among adolescent students in Mumbai: A cross-sectional survey. *BMC Public Health* 2011;11:805.~~

~~[23] Collumbien M, Mishra M, Blackmore C. Youth friendly services in two rural districts of West Bengal and Jharkhand, India: Definite progress, a long way to go. *Reprod Health Matters* 2011;19:174-83.~~

[214] Brown SS, Burdette L, Rodriguez P. Looking inward: Provider-based barriers to contraception among teens and young adults. *Contraception* 2008;78:355-7.

[225] Campbell M, Sahin-Hodoglugil NN, Potts M. Barriers to fertility regulation: A review of the literature. *Stud Fam Plann* 2006;37(2):87-98.

[236] Mbitvo MT, Chou D, Shaw D. Today's evidence, tomorrow's agenda: implementation of strategies to improve global reproductive health. *Int J Gynaecol Obstet*. 2013 May;121 Suppl 1:S3-8.

Field Code Changed

[247] Jacobstein R, Curtis C, Spieler J, Radloff S. Meeting the need for modern contraception: effective solutions to a pressing global challenge. *Int J Gynaecol Obstet*. 2013 May;121 Suppl 1:S9-15.

Formatted: German (Germany)

Field Code Changed

~~[29] Krupp K, Madhivanan P. Leveraging human capital to reduce maternal mortality in India: Enhanced public health system or public-private partnership? *Hum Resour Health* 2009;7:18.~~



1  
2  
3  
4  
5  
6  
7  
8  
9  
10  
11  
12  
13  
14  
15  
16  
17  
18  
19  
20  
21  
22  
23  
24  
25  
26  
27  
28  
29  
30  
31  
32  
33  
34  
35  
36  
37  
38  
39  
40  
41  
42  
43  
44  
45  
46  
47  
48  
49  
50  
51  
52  
53  
54  
55  
56  
57  
58  
59  
60

[2530] Jejeebhoy SJ, Kalyanwala S, Mundle S, et al. Feasibility of expanding the medication abortion provider base in India to include ayurvedic physicians and nurses. *Int Perspect Sex Reprod Health* 2012;38:133-42.

[2634] Acharya R, Kalyanwala S. Knowledge, attitudes, and practices of certified providers of medical abortion: Evidence from Bihar and Maharashtra, India. *Int J Gynaecol Obstet* 2012;118 Suppl 1:S40-6.

[32] Jayaraman A, Mishra V, Arnold F. The relationship of family size and composition to fertility desires, contraceptive adoption and method choice in South Asia. *Int Perspect Sex Reprod Health* 2009;35:29-38.

[33] Char A, Saavala M, Kulmala T. Influence of mothers-in-law on young couples' family planning decisions in rural India. *Reprod Health Matters* 2010;18:154-162.

[2734] Harper CC, Brown BA, Foster-Rosales A, Raine TR. Hormonal contraceptive method choice among young, low-income women: How important is the provider? *Patient Educ Counsel* 2010;81:349-54.

[35] World Health Organization (WHO). Country health system profile: India. Geneva: WHO, 2008.

[36] Gessesew A, Barnabas GA, Prata N, Weidert K. Task shifting and sharing in Tigray, Ethiopia, to achieve comprehensive emergency obstetric care. *Int J Gynaecol Obstet* 2011;113: 28-31.

[37] Pereira C, Mbaruku G, Nzabuhakwa C, Bergström S, McCord C. Emergency obstetric surgery by non-physician clinicians in Tanzania. *Int J Gynaecol Obstet*. 2011 Aug;114(2):180-3.

[38] Culwell KR, Vekemans M, de Silva U, Hurwitz M, Crane BB. Critical gaps in universal access to reproductive health: contraception and prevention of unsafe abortion. *Int J Gynaecol Obstet*. 2010 Jul;110 Suppl:S13-6.

Research checklist for paper: Medical students' knowledge, attitudes, and perceptions on contraceptive use and counselling: a cross-sectional survey in Maharashtra, India.

STROBE Statement—Checklist of items that should be included in reports of *cross-sectional studies*

|                              | Item No | Recommendation                                                                                                                                                                                                                                                                                                                                                                                                                                                                                             |
|------------------------------|---------|------------------------------------------------------------------------------------------------------------------------------------------------------------------------------------------------------------------------------------------------------------------------------------------------------------------------------------------------------------------------------------------------------------------------------------------------------------------------------------------------------------|
| <b>Title and abstract</b>    | 1       | (a) Indicate the study's design with a commonly used term in the title or the abstract.<br><i>YES</i><br>(b) Provide in the abstract an informative and balanced summary of what was done and what was found. <i>YES</i>                                                                                                                                                                                                                                                                                   |
| <b>Introduction</b>          |         |                                                                                                                                                                                                                                                                                                                                                                                                                                                                                                            |
| Background/rationale         | 2       | Explain the scientific background and rationale for the investigation being reported.<br><i>YES</i>                                                                                                                                                                                                                                                                                                                                                                                                        |
| Objectives                   | 3       | State specific objectives, including any prespecified hypotheses.<br><i>AIM included which correspond with Title.</i>                                                                                                                                                                                                                                                                                                                                                                                      |
| <b>Methods</b>               |         |                                                                                                                                                                                                                                                                                                                                                                                                                                                                                                            |
| Study design                 | 4       | Present key elements of study design early in the paper.<br><i>YES in abstract, focus of paper and in method section</i>                                                                                                                                                                                                                                                                                                                                                                                   |
| Setting                      | 5       | Describe the setting, locations, and relevant dates, including periods of recruitment, exposure, follow-up, and data collection.<br><i>YES short but focused on important aspects.</i>                                                                                                                                                                                                                                                                                                                     |
| Participants                 | 6       | (a) Give the eligibility criteria, and the sources and methods of selection of participants. <i>YES</i>                                                                                                                                                                                                                                                                                                                                                                                                    |
| Variables                    | 7       | Clearly define all outcomes, exposures, predictors, potential confounders, and effect modifiers. Give diagnostic criteria, if applicable. <i>YES.</i>                                                                                                                                                                                                                                                                                                                                                      |
| Data sources/<br>measurement | 8*      | For each variable of interest, give sources of data and details of methods of assessment (measurement). Describe comparability of assessment methods if there is more than one group. <i>YES.</i>                                                                                                                                                                                                                                                                                                          |
| Bias                         | 9       | Describe any efforts to address potential sources of bias. <i>YES in methodological considerations.</i>                                                                                                                                                                                                                                                                                                                                                                                                    |
| Study size                   | 10      | Explain how the study size was arrived at. <i>YES in sampling.</i>                                                                                                                                                                                                                                                                                                                                                                                                                                         |
| Quantitative variables       | 11      | Explain how quantitative variables were handled in the analyses. If applicable, describe which groupings were chosen and why. <i>YES</i>                                                                                                                                                                                                                                                                                                                                                                   |
| Statistical methods          | 12      | (a) Describe all statistical methods, including those used to control for confounding. <i>YES.</i><br>(b) Describe any methods used to examine subgroups and interactions. <i>YES.</i><br>(c) Explain how missing data were addressed. <i>Hardly any missing data (external or internal. Missing is reported in tables.</i><br>(d) If applicable, describe analytical methods taking account of sampling strategy. <i>Not applicable.</i><br>(e) Describe any sensitivity analyses. <i>Not applicable.</i> |
| <b>Results</b>               |         |                                                                                                                                                                                                                                                                                                                                                                                                                                                                                                            |
| Participants                 | 13*     | (a) Report numbers of individuals at each stage of study—eg numbers potentially eligible, examined for eligibility, confirmed eligible, included in the study, completing follow-up, and analysed. <i>YES.</i><br>(b) Give reasons for non-participation at each stage. <i>YES.</i><br>(c) Consider use of a flow diagram. <i>Not adequate.</i>                                                                                                                                                            |

|    |                          |     |                                                                                                                                                                                                                           |
|----|--------------------------|-----|---------------------------------------------------------------------------------------------------------------------------------------------------------------------------------------------------------------------------|
| 1  |                          |     |                                                                                                                                                                                                                           |
| 2  | Descriptive data         | 14* | (a) Give characteristics of study participants (eg demographic, clinical, social) and information on exposures and potential confounders. <i>YES in table 1 and then included in analyses.</i>                            |
| 3  |                          |     |                                                                                                                                                                                                                           |
| 4  |                          |     |                                                                                                                                                                                                                           |
| 5  |                          |     |                                                                                                                                                                                                                           |
| 6  |                          |     | (b) Indicate number of participants with missing data for each variable of interest. <i>YES reported in tables.</i>                                                                                                       |
| 7  |                          |     |                                                                                                                                                                                                                           |
| 8  | Outcome data             | 15* | Report numbers of outcome events or summary measures. <i>YES.</i>                                                                                                                                                         |
| 9  | Main results             | 16  | (a) Give unadjusted estimates and, if applicable, confounder-adjusted estimates and their precision (eg, 95% confidence interval). Make clear which confounders were adjusted for and why they were included. <i>YES.</i> |
| 10 |                          |     |                                                                                                                                                                                                                           |
| 11 |                          |     | (b) Report category boundaries when continuous variables were categorized. <i>Not relevant.</i>                                                                                                                           |
| 12 |                          |     |                                                                                                                                                                                                                           |
| 13 |                          |     | (c) If relevant, consider translating estimates of relative risk into absolute risk for a meaningful time period. <i>Not relevant.</i>                                                                                    |
| 14 |                          |     |                                                                                                                                                                                                                           |
| 15 |                          |     |                                                                                                                                                                                                                           |
| 16 |                          |     |                                                                                                                                                                                                                           |
| 17 |                          |     |                                                                                                                                                                                                                           |
| 18 | Other analyses           | 17  | Report other analyses done—eg analyses of subgroups and interactions, and sensitivity analyses. <i>No.</i>                                                                                                                |
| 19 |                          |     |                                                                                                                                                                                                                           |
| 20 |                          |     |                                                                                                                                                                                                                           |
| 21 | <b>Discussion</b>        |     |                                                                                                                                                                                                                           |
| 22 | Key results              | 18  | Summarise key results with reference to study objectives. <i>YES in beginning of discussion.</i>                                                                                                                          |
| 23 |                          |     |                                                                                                                                                                                                                           |
| 24 | Limitations              | 19  | Discuss limitations of the study, taking into account sources of potential bias or imprecision. Discuss both direction and magnitude of any potential bias. <i>YES included in methodological considerations.</i>         |
| 25 |                          |     |                                                                                                                                                                                                                           |
| 26 |                          |     |                                                                                                                                                                                                                           |
| 27 |                          |     |                                                                                                                                                                                                                           |
| 28 | Interpretation           | 20  | Give a cautious overall interpretation of results considering objectives, limitations, multiplicity of analyses, results from similar studies, and other relevant evidence. <i>YES.</i>                                   |
| 29 |                          |     |                                                                                                                                                                                                                           |
| 30 |                          |     |                                                                                                                                                                                                                           |
| 31 | Generalisability         | 21  | Discuss the generalisability (external validity) of the study results. <i>YES included in methodological considerations.</i>                                                                                              |
| 32 |                          |     |                                                                                                                                                                                                                           |
| 33 |                          |     |                                                                                                                                                                                                                           |
| 34 | <b>Other information</b> |     |                                                                                                                                                                                                                           |
| 35 | Funding                  | 22  | Give the source of funding and the role of the funders for the present study and, if applicable, for the original study on which the present article is based. <i>YES.</i>                                                |
| 36 |                          |     |                                                                                                                                                                                                                           |
| 37 |                          |     |                                                                                                                                                                                                                           |
| 38 |                          |     |                                                                                                                                                                                                                           |

\*Give information separately for exposed and unexposed groups.

**Note:** An Explanation and Elaboration article discusses each checklist item and gives methodological background and published examples of transparent reporting. The STROBE checklist is best used in conjunction with this article (freely available on the Web sites of PLoS Medicine at <http://www.plosmedicine.org/>, Annals of Internal Medicine at <http://www.annals.org/>, and Epidemiology at <http://www.epidem.com/>). Information on the STROBE Initiative is available at [www.strobe-statement.org](http://www.strobe-statement.org).

## Questionnaire

### Knowledge, Attitude & Perception On Contraceptive Services & Abortion Care

In order to increase our knowledge about what you think is needed in your education and for your future work we have designed this questionnaire as part of the co-operation between the pre service Comprehensive Abortion Care orientation program for interns in INDIA and Uppsala University, Sweden.

Name of the institution: \_\_\_\_\_

| Section 1: Your background       |                            |
|----------------------------------|----------------------------|
| 1.1 What is your sex?            | Female 1                   |
|                                  | Male 2                     |
| 1.2 How old are you?             | Years old .....            |
| 1.3 What is your religion?       | Hindu 1                    |
|                                  | Muslim 2                   |
|                                  | Christian 3                |
|                                  | Other ..... 4<br>(Specify) |
| 1.4 What is your marital status? | Single 1                   |
|                                  | Married 3                  |
|                                  | Other ..... 4              |
| 1.5 Where were you born?         | Rural area 1               |
|                                  | Urban area 2               |

|                                                                                                          |                                                                                                                |
|----------------------------------------------------------------------------------------------------------|----------------------------------------------------------------------------------------------------------------|
| <b>Section 2 Training</b>                                                                                |                                                                                                                |
| <b>2.6</b> What do you think are the special problems within sexual & reproductive health today in India | <b><u>Please write in your own words</u></b>                                                                   |
| <b>2.7</b> Has the topic sexual & reproductive health been included in your study programme?             | <p>Not at all 1 ( )</p> <p>Somewhat 2 ( )</p> <p>Sufficiently 3 ( )</p>                                        |
| <b>2.8</b> How do you assess your theoretical knowledge in sexual & reproductive health to be?           | <p>Poor 1 ( )</p> <p>Fair 2 ( )</p> <p>Good 3 ( )</p> <p>Very good 4 ( )</p>                                   |
| <b>2.9</b> Have you had clinical practice in abortion care services during your training?                | <p>Yes 1 ( )</p> <p>No 2 ( )</p>                                                                               |
| <b>2.11</b> Do you think counselling should be given in group or individually?                           | <p>In group 1 ( )</p> <p>Individually 2 ( )</p>                                                                |
| <b>2.12</b> Who is most suitable to give information about contraceptive methods?                        | <p>Doctor 1 ( )</p> <p>Nurses 2 ( )</p> <p>Pharmacist 3 ( )</p> <p>Health worker 4 ( )</p> <p>Others -----</p> |

|                                                                                               |     |       |
|-----------------------------------------------------------------------------------------------|-----|-------|
| 2.13 As a future doctor, would you like to have responsibility for contraceptive information? | Yes | 1 ( ) |
|                                                                                               | No  | 2 ( ) |
|                                                                                               |     |       |

|                                                                                                           |                      |   |
|-----------------------------------------------------------------------------------------------------------|----------------------|---|
| <b>Section 3 Perception on contraceptive methods</b>                                                      |                      |   |
|                                                                                                           |                      |   |
| 3.1 Has the topic contraceptive methods been included in your study programme (in school or at hospital)? | Not at all           | 1 |
|                                                                                                           | Somewhat             | 2 |
|                                                                                                           | Sufficiently         | 3 |
| 3.2 When should oral contraceptive pill be taken?                                                         | After intercourse    | 1 |
|                                                                                                           | Once a month         | 2 |
|                                                                                                           | Every day            | 3 |
| 3.4 Which contraceptive method do you think is most suitable for women?<br><br>CIRCLE ONE ANSWER          | Pill                 | 1 |
|                                                                                                           | Condom               | 2 |
|                                                                                                           | Emergency Pill       | 3 |
|                                                                                                           | IUD                  | 4 |
|                                                                                                           | Withdrawal           | 5 |
|                                                                                                           | Safe periods         | 6 |
|                                                                                                           | Female sterilization | 7 |
|                                                                                                           | Male sterilization   | 8 |

| <b>Statements</b><br>Please place a tick in the circle which you feel most appropriate answer.          | Disagree completely | Disagree | Neutral | Agree | Agree completely |
|---------------------------------------------------------------------------------------------------------|---------------------|----------|---------|-------|------------------|
| 3.5 Contraceptive pill might cause cancer                                                               | ( )                 | ( )      | ( )     | ( )   | ( )              |
| 3.6 Contraceptive pill can cause infertility                                                            | ( )                 | ( )      | ( )     | ( )   | ( )              |
| 3.7 Contraceptive pill is inconvenient to use                                                           | ( )                 | ( )      | ( )     | ( )   | ( )              |
| 3.8 Emergency contraceptive pill can be used several times a month                                      | ( )                 | ( )      | ( )     | ( )   | ( )              |
| 3.9 Condoms protects against STD/HIV                                                                    | ( )                 | ( )      | ( )     | ( )   | ( )              |
| 3.10 Contraceptive information should be only for married couples                                       | ( )                 | ( )      | ( )     | ( )   | ( )              |
| 3.12 Traditional values are barriers for sexual education in India                                      | ( )                 | ( )      | ( )     | ( )   | ( )              |
| 3.13 Sexual education encourage unmarried to have sex                                                   | ( )                 | ( )      | ( )     | ( )   | ( )              |
| 3.14 Doctors working in abortion service have friendly attitude towards unmarried clients               | ( )                 | ( )      | ( )     | ( )   | ( )              |
| 3.15 Married couples are shy to talk about contraceptive with each other                                | ( )                 | ( )      | ( )     | ( )   | ( )              |
| 3.16 Women feel confident discussing contraception with doctors                                         | ( )                 | ( )      | ( )     | ( )   | ( )              |
| 3.18 Traditional contraceptive methods (safe periods, withdrawal) are the best methods                  | ( )                 | ( )      | ( )     | ( )   | ( )              |
| Section 4 Abortion<br><br><b>Statements</b><br>Please place a tick in the circle below the right answer | Disagree completely | Disagree | Neutral | Agree | Agree completely |
| 4.1 Unsafe abortion is a serious health problem in India                                                | ( )                 | ( )      | ( )     | ( )   | ( )              |
| 4.2 Abortion among unmarried are rising in India                                                        | ( )                 | ( )      | ( )     | ( )   | ( )              |
| 4.3 Abortion is more dangerous/harmful for unmarried women than for married                             | ( )                 | ( )      | ( )     | ( )   | ( )              |

|                                                                                                                                                                                                                                                                                                                                                             |                                                                                                            |     |     |     |     |     |
|-------------------------------------------------------------------------------------------------------------------------------------------------------------------------------------------------------------------------------------------------------------------------------------------------------------------------------------------------------------|------------------------------------------------------------------------------------------------------------|-----|-----|-----|-----|-----|
| 1<br>2<br>3<br>4<br>5<br>6<br>7<br>8<br>9<br>10<br>11<br>12<br>13<br>14<br>15<br>16<br>17<br>18<br>19<br>20<br>21<br>22<br>23<br>24<br>25<br>26<br>27<br>28<br>29<br>30<br>31<br>32<br>33<br>34<br>35<br>36<br>37<br>38<br>39<br>40<br>41<br>42<br>43<br>44<br>45<br>46<br>47<br>48<br>49<br>50<br>51<br>52<br>53<br>54<br>55<br>56<br>57<br>58<br>59<br>60 | 4.4 Unmarried women have more complications from abortion than married                                     | ( ) | ( ) | ( ) | ( ) | ( ) |
|                                                                                                                                                                                                                                                                                                                                                             | 4.5 Unmarried women prefer to have abortion outside of public health clinics                               | ( ) | ( ) | ( ) | ( ) | ( ) |
|                                                                                                                                                                                                                                                                                                                                                             | 4.6 Abortion at clinics outside of the public health care are more harmful than abortion at public clinics | ( ) | ( ) | ( ) | ( ) | ( ) |
|                                                                                                                                                                                                                                                                                                                                                             | 4.7 Abortion among unmarried is acceptable in case of an unplanned pregnancy                               | ( ) | ( ) | ( ) | ( ) | ( ) |
|                                                                                                                                                                                                                                                                                                                                                             | 4.8 Abortion is morally wrong                                                                              | ( ) | ( ) | ( ) | ( ) | ( ) |
|                                                                                                                                                                                                                                                                                                                                                             | 4.9 A woman should always have the right to have an abortion in case of an unwanted pregnancy              | ( ) | ( ) | ( ) | ( ) | ( ) |
|                                                                                                                                                                                                                                                                                                                                                             | 4.10 A woman need to have her partner/spouse approval to have an abortion                                  | ( ) | ( ) | ( ) | ( ) | ( ) |
|                                                                                                                                                                                                                                                                                                                                                             | 4. 11 Abortion is not harmful if it is clinically safe                                                     | ( ) | ( ) | ( ) | ( ) | ( ) |
|                                                                                                                                                                                                                                                                                                                                                             | 4.12 Abortion clients are treated in privacy in India                                                      | ( ) | ( ) | ( ) | ( ) | ( ) |
|                                                                                                                                                                                                                                                                                                                                                             | 4.13 Women prefer to have surgical abortion rather than medical abortion                                   | ( ) | ( ) | ( ) | ( ) | ( ) |
|                                                                                                                                                                                                                                                                                                                                                             | 4. 15 Surgical abortion is more harmful than medical abortion                                              | ( ) | ( ) | ( ) | ( ) | ( ) |
|                                                                                                                                                                                                                                                                                                                                                             | 4.16 Specially trained General Nurse midwives have a potential to provide abortions in India               | ( ) | ( ) | ( ) | ( ) | ( ) |

**Thank you for your participation!**





**Medical students' knowledge, attitudes, and perceptions on contraceptive use and counselling: a cross-sectional survey in Maharashtra, India**

|                                 |                                                                                                                                                                                                                                                                                                                                                                                                                                                                         |
|---------------------------------|-------------------------------------------------------------------------------------------------------------------------------------------------------------------------------------------------------------------------------------------------------------------------------------------------------------------------------------------------------------------------------------------------------------------------------------------------------------------------|
| Journal:                        | <i>BMJ Open</i>                                                                                                                                                                                                                                                                                                                                                                                                                                                         |
| Manuscript ID:                  | bmjopen-2013-003739.R2                                                                                                                                                                                                                                                                                                                                                                                                                                                  |
| Article Type:                   | Research                                                                                                                                                                                                                                                                                                                                                                                                                                                                |
| Date Submitted by the Author:   | 05-Oct-2013                                                                                                                                                                                                                                                                                                                                                                                                                                                             |
| Complete List of Authors:       | Hogmark, Sara; Uppsala University, Womens and Childrens Health; Falu County Hospital, Obstetrics and Gynaecology<br>klingsberg-allvin, marie; Uppsala University, Womens and Childrens Health; Dalarna University, School of Social and Health Science<br>Gemzell, Kristina; Karolinska Institutet, Womens and Childrens Health<br>Ohlsson, Hannes; Uppsala University, Womens and Childrens Health<br>Essen, Birgitta; Uppsala University, Womens and Childrens Health |
| <b>Primary Subject Heading</b>: | Obstetrics and gynaecology                                                                                                                                                                                                                                                                                                                                                                                                                                              |
| Secondary Subject Heading:      | Global health, Obstetrics and gynaecology, Public health, Sexual health, Medical education and training                                                                                                                                                                                                                                                                                                                                                                 |
| Keywords:                       | EDUCATION & TRAINING (see Medical Education & Training), Reproductive medicine < GYNAECOLOGY, Public health < INFECTIOUS DISEASES                                                                                                                                                                                                                                                                                                                                       |
|                                 |                                                                                                                                                                                                                                                                                                                                                                                                                                                                         |

SCHOLARONE™  
Manuscripts

only

1  
2  
3  
4  
5  
6  
7  
8  
9  
10  
11 Title: Medical students' knowledge, attitudes, and perceptions on contraceptive use and  
12 counselling: a cross-sectional survey in Maharashtra, India  
13

14  
15 Hogmark Sara, MD, Dept. of Obstetrics and Gynaecology, Falu County Hospital, Falun,  
16 Sweden; Dept. of Women's and Children's Health (IMCH), Uppsala University, Sweden  
17  
18

19  
20 Klingberg-Allvin Marie, Senior Lecturer, Dept. of Women's and Children's Health, Uppsala  
21 University; Dept. of Women's and Children's Health, Karolinska Institutet; School of Social  
22 and Health Science, Dalarna University, Sweden  
23  
24

25  
26 Ohlsson Hannes, MD, Dept. of Women's and Children's Health (IMCH), Uppsala University,  
27 Sweden  
28  
29

30  
31 Gemzell-Danielsson Kristina, Professor, Dept. of Women's and Children's Health,  
32 Karolinska Institutet, Sweden  
33  
34

35  
36  
37 Essén Birgitta, Asst. Prof., Dept. of Women's and Children's Health (IMCH), Uppsala  
38 University, Sweden  
39  
40  
41  
42

43  
44  
45 Keywords: contraceptives, medical students, India, reproductive health, cross sectional survey  
46  
47

48 Word count: 2480 (excluding abstract and references)  
49  
50  
51  
52  
53

1  
2  
3  
4  
5  
6  
7  
8  
9  
10  
11 ABSTRACT

12  
13 *Objectives:* This study aimed to investigate knowledge, attitudes, and perceptions on  
14 contraceptive use and counselling among medical students in Maharashtra, India.  
15

16  
17 *Setting:* Considerable global maternal mortality and morbidity could be avoided through the  
18 use of effective contraception. In India, contraception services are frequently unavailable or  
19 there are obstacles to obtaining modern, reversible contraceptives.  
20

21  
22 *Participants:* A cross-sectional descriptive study using a self-administered questionnaire was  
23 conducted among 1996 medical students in their fifth year of study at 27 medical colleges in  
24 the state of Maharashtra, India. Descriptive and analytical statistics interpreted the survey  
25 instrument and significant results were presented with a 95% confidence interval.  
26

27  
28 *Results:* Respondents expressed the desire to provide contraceptive services. Few had  
29 experienced training in abortion care. There were misconceptions about modern contraceptive  
30 methods and the impact of sex education. Attitudes towards contraception were mainly  
31 positive, pre-marital counselling was supported, and the influence of traditional values and  
32 negative provider attitudes on services was recognized. Gender, area of upbringing, and type  
33 of medical college did not change the results.  
34

35  
36 *Conclusions:* Despite mostly positive attitudes towards modern contraceptives, sex education,  
37 and family planning counselling, medical students in Maharashtra have misconceptions about  
38 modern methods of contraception. Pre- and in-service training in contraceptive counselling  
39 should be implemented in order to increase women's access to evidence-based maternal  
40 health care services.  
41  
42  
43  
44  
45  
46  
47  
48  
49  
50  
51  
52  
53  
54  
55  
56  
57  
58  
59  
60

### Article summary

Contraceptive use is an effective primary prevention strategy to avoid unintended pregnancies and unsafe abortions and thus reduces maternal mortality and morbidity.

This study aimed to investigate knowledge, attitudes, and perceptions on contraceptive use and counselling among medical students in Maharashtra, India.

### Key message points

Despite mostly positive attitudes towards modern contraceptives, sex education, and family planning counselling, medical students in Maharashtra show misconceptions about modern contraceptives, and lack training in family planning services.

Respondents expressed a desire to provide sexual and reproductive health services to people regardless of their marital status.

Pre- and in-service training in evidence-based contraceptive counselling should be implemented in order to increase the access to comprehensive family planning services in India.

### Strengths and Limitations

This study contributes with important evidence that may be used to revise basic medical education in contraceptive counselling and thus reduce maternal mortality related to unintended pregnancies in India.

Important limitation with this study is the non-probability sampling technique applied and this might reduce the external validity.

The large sample size and the high proportion of the total number and the presence of medical students from public and private medical schools in both urban and semi-urban settings strengthen the generalizability.

## INTRODUCTION

Contraceptive use is an effective primary prevention strategy for reducing maternal mortality [1]. It has been estimated that the use of effective contraception could avert 90% of abortion-related and more than 20% of obstetric-related mortality globally [2]. Abortion incidence is inversely associated with the level of contraceptive use, especially where fertility rates are stable [3]. In addition, comprehensive sex education has the potential to prevent unintended pregnancies that lead to unsafe abortions [4]. In order to meet the increasing demand for contraceptives and ensure the sexual and reproductive health and rights of women, including the right to planned parenthood, intensified efforts are urgently needed [5].

India accounts for 20% of maternal deaths worldwide [6]. Despite the fact that induced abortion has been legal in India since 1971, most of the approximately 6.7 million annually induced abortions are performed in an unsafe manner [7, 8]. Moreover, a recent study concluded that 70% of all Indian women who have an abortion do not use post-abortion contraception [9]. The unmet need for modern contraceptives is 22% in the cities and higher in rural areas. Female sterilization is the most common contraceptive practice and accounts for 75% of all methods used [10]. The use of reversible, modern methods in order to postpone birth of a first child or for spacing births is infrequent [11].

Some of the barriers that impede women's access to contraception are health care providers who are inadequately trained, insufficient in number, and poorly supervised [12]. Studies have shown that improving quality of care increases and sustains contraceptive use by women [13]. Providers need adequate knowledge of contraceptive methods and training in counselling skills in order to provide reliable information to women [14]. Despite the availability of effective methods of contraception in India, many pregnancies remain unintended. Considering the future role of medical students as contraceptive counsellors, little

1  
2  
3  
4  
5  
6  
7  
8  
9  
10  
11 is known about their views on contraceptive methods, use, or counselling. This study aimed to  
12 investigate knowledge, attitudes, and perceptions on contraceptive use and counselling among  
13 medical students in Maharashtra, India.  
14  
15

## 16 17 MATERIALS AND METHODS 18

19  
20 In February 2011, a cross-sectional survey was conducted using a pre-tested, self-  
21 administered questionnaire among medical students in their fifth year (internship) of training  
22 in the Indian state of Maharashtra [15]. Out of a total of 43 medical colleges in Maharashtra  
23 (5,195 students), 19 are Public (2,200 students). A convenience sample of 27 colleges (8  
24 public and 19 private) was included in the study. The total number of students eligible at the  
25 study sites were 2,006 and in total 1,996 responded to the questionnaire (1,423 private  
26 colleges and 573 public colleges). All medical students at the selected institutions were asked  
27 to participate before attending a lecture in comprehensive abortion care (CAC). The lecture  
28 was organized by a non-governmental organization within the medical education program.  
29  
30  
31  
32  
33  
34  
35

### 36 **Study setting** 37

38  
39 Located in west-central India, Maharashtra is the country's second most populous state and  
40 the third largest by area. Of its 112 million inhabitants, a slight majority live in rural areas.  
41 Maharashtra's socio-economic status, literacy rate, and health infrastructure are better than  
42 the national average [16]. Medical education in India is regulated by the Medical Council of  
43 India and is either public or private. Medical education consists of 4.5 years of theoretical  
44 studies followed by one year of internship. According to the national medical education  
45 curriculum the theoretical studies should cover comprehensive abortion care, as well as  
46 contraceptive methods, and counselling [17].  
47  
48  
49  
50  
51  
52  
53  
54  
55  
56  
57  
58  
59  
60

## Instrument

The questionnaire contained three sections. Section 1 included socio-demographic characteristics as gender, age, religion, marital status, place of birth/area of upbringing, and type of college. Section 2 included questions related to perception of education and training in sexual and reproductive health, and respondents' assessment of their knowledge regarding contraceptive methods and services. Section 3 consisted of twelve statements on different aspects of contraceptive methods, services, and values surrounding sexual and reproductive health. Participants were asked to circle the most appropriate alternative on a five-point Likert scale (Disagree completely/Disagree/Neither agree nor disagree/Agree/Agree completely) [18].

## Statistical analysis

Questionnaires that contained one or more answers were included in the analysis. Statistical Package for Social Studies (SPSS) 20.0 software was used. Descriptive statistics were applied to all sections of the questionnaire; actual numbers and proportions were calculated; and cross-tabulations with intergroup comparisons of answers were made for students of different genders, types of colleges, and places of birth. The alternatives 'agree' and 'agree completely' were aggregated, as well as the alternatives 'disagree' and 'disagree completely'. Any difference with a 95% confidence interval (CI) was regarded as significant.

## Ethical considerations

The study was carried out in compliance with the principles of the World Medical Association Declaration of Helsinki. The medical students eligible for participation in the study were given oral information about the study and were informed that participation was anonymous

1  
2  
3  
4  
5  
6  
7  
8  
9  
10  
11 and voluntary and that choosing not to participate would not affect their studies or future  
12 careers negatively. By filling in the questionnaire written consent to participation was given.  
13 Permission to conduct the survey in connection with the training programme was obtained  
14 from the principal at each college. The study has been approved by the research ethical  
15 committee at Karolinska Institutet (Dnr: 2013/415-31/4).  
16  
17  
18  
19

## 20 RESULTS

21  
22  
23 A total of 1,996 medical students participated in the study (response rate 99%; 1,996/2,006).  
24 The demographic characteristics of the students are outlined in Table 1. Since the students  
25 were homogenous in terms of age, religion, and marital status, the variables remaining for  
26 inter-group comparisons were gender (56.8% male, 43.1% female), place of birth (72.3%  
27 urban, 25.5% rural), and type of college (71.3% private, 28.7% public).  
28  
29  
30  
31

32  
33 Table 2 shows the students' perception of education and training in sexual and reproductive  
34 health, and respondents' assessment of their knowledge regarding contraceptive methods and  
35 services. Most of the students thought that the topic of reproductive health had been  
36 adequately covered in their curriculum, including contraceptive methods. A majority  
37 considered their theoretical knowledge in sexual and reproductive health fair or good. A large  
38 proportion reported having had no clinical practice in abortion care services during their  
39 training. A comparison between students from private and public colleges revealed no  
40 significant differences.  
41  
42  
43  
44  
45

46  
47 With regard to contraceptive counselling, 74.0% believed it should be given individually and  
48 not in a group. A majority of the respondents (67.2%) thought doctors should be the ones to  
49 provide contraception to patients, while 27.1% considered health workers to be the most  
50 appropriate counsellors. A few students chose other alternatives (nurse 3,0%, other 1,6%,  
51  
52  
53  
54



1  
2  
3  
4  
5  
6  
7  
8  
9  
10  
11 missing 1,1%). A majority (95.1%) indicated they would like to have responsibility for  
12 providing information on contraception as future doctors. Regarding the use of oral  
13 contraceptives, 88.5% of the students stated they should be taken every day. Some students  
14 (5.8%) thought they were to be taken after intercourse or once a month (3.4%). A cross-  
15 sectional analysis of answers given by students with rural versus urban places of birth  
16 revealed no significant differences with regard to these results. However, those from private  
17 colleges preferred individual contraceptive counselling over group counselling (private  
18 college students 78.2%, CI 95%, 75.9–80.3; public college students 70.6%, CI 95%, 66.6–  
19 74.4). Female students were also more supportive of individual counselling than males  
20 (females 80.2%, CI 95%, 77.4–82.9; males 72.8%, CI 95%, 70.1–75.4). Females also  
21 expressed a greater interest in having responsibility for providing contraceptive information  
22 as future doctors than males (females 98.2%, CI 95%, 96.8–98.8; males 95.3% CI, 93.8–  
23 96.4). Moreover, female students were better informed on the daily intake of oral  
24 contraceptive pills than males (females 93.3%, CI 95%, 91.5–94.9; males 88.8%, CI 95%,  
25 86.8–90.6).

26  
27  
28  
29  
30  
31  
32  
33  
34  
35  
36  
37 The knowledge, attitudes, and perceptions of medical students on contraceptive methods,  
38 services, and values surrounding sexual and reproductive health are shown in Table 3. Cross-  
39 sectional analysis comparing students from public and private colleges indicated a difference  
40 of opinion regarding the statement “Doctors working in abortion service have friendly  
41 attitudes towards unmarried women”. Fewer students from private colleges agreed or agreed  
42 completely as compared to students from public colleges (private college students 43.8%, CI  
43 95%, 41.8–46.4; public college students 51.2%, CI 95%, 47.0–51.4).

44  
45  
46  
47  
48  
49  
50 Table 4 summarizes the significant differences in perceptions found among students based on  
51 their place of birth (urban or rural): Students with urban place of birth to a higher extent  
52  
53

1  
2  
3  
4  
5  
6  
7  
8  
9  
10  
11 agreed to that “Contraceptive pills might cause cancer” (urban 74.1%, CI 95%, 71.8–76.4;  
12 rural 66.4%, CI 95%, 62.2–70.5); A larger proportion of students with rural background  
13 agreed to the statement that “Doctors working in abortion service have friendly attitudes  
14 towards unmarried women” (rural 55.9%, CI 95%, 51.6-60.2; urban 42.4, CI 95%, 39.8–  
15 45.0).; and it was more common for students with rural place of birth to agree to the statement  
16 “Sex education encourages unmarried people to have sex” (rural 20.2%, CI 95%, 16.9–24.0;  
17 urban 13.2, CI 95%, 11.5–15.1).  
18  
19  
20  
21  
22  
23

24 Table 5 compares male and female medical students’ knowledge, attitudes, and perceptions  
25 on contraception. More female students agreed or agreed completely that contraceptive pills  
26 might cause cancer. Males tended to believe that emergency contraceptive pills may be used  
27 several times a month. Both male and female students largely agreed or agreed completely  
28 that condoms protect against sexually transmitted diseases (STD) and HIV, although females  
29 were significantly more supportive of their use. One in five males versus one in ten females  
30 agreed or agreed completely that sex education encourages unmarried people to have sex.  
31 Among males, 51.4% agreed or agreed completely that doctors working in abortion services  
32 have friendly attitudes towards unmarried women, compared to 38.5% among females.  
33  
34  
35  
36  
37  
38  
39

## 40 **DISCUSSION**

41  
42 The major finding in this study is the inadequate level of training in comprehensive abortion  
43 care and contraceptive counselling of medical students who already passed the theoretical part  
44 of the medical education. Our findings further suggest that even though the medical students  
45 surveyed had experienced little training in abortion care services, they expressed a clear  
46 interest in disseminating contraceptive information as future physicians. Although they had  
47 mostly positive attitudes toward contraception and pre-marital counselling, misconceptions  
48 about modern contraceptive methods and the impact of sex education were common.  
49  
50  
51  
52  
53  
54

1  
2  
3  
4  
5  
6  
7  
8  
9  
10  
11 Few respondents in our study had had any clinical experience in abortion care services, yet a  
12 majority thought the topics of sexual and reproductive health and contraceptive methods had  
13 been adequately covered in their coursework. Still, nearly one in five interns falsely believed  
14 that contraceptive pills can cause infertility and one in ten did not know that contraceptive  
15 pills are to be taken on a daily basis. More females than males were unaware that emergency  
16 contraceptive pills may be used several times a month. A majority of both males and females  
17 perceived that contraceptive pills might cause cancer, although females were more likely to  
18 agree on this. Recent studies indicate that family planning training during residency improves  
19 future physicians' proficiency in contraceptive counselling [19].  
20  
21  
22  
23  
24  
25

26  
27 Our findings did not reveal any differences in self-rated or theoretical knowledge between  
28 public and private college students. The background factor that had the greatest influence on  
29 knowledge was gender. Female students were better informed about the utilisation of oral  
30 contraceptives and the protection that condoms offer against STD/HIV. They also report that  
31 sex education does not encourage unmarried people to have sex. Regardless of demographic  
32 background, most students in our study recognized that traditional values are barriers to sex  
33 education. Few thought contraceptive information should only be provided to married  
34 couples, although students born in rural areas had more negative perceptions of sex education.  
35 The socio-cultural norms of Indian society contribute to making sex-related issues taboo and  
36 hinder young people from seeking counselling regarding sexual health [20]. Research reveals  
37 that health care providers often impose unnecessary barriers in dispensing contraceptives,  
38 including denial of a contraceptive method on the basis of age, parity, marital status, or lack  
39 of parental or spousal authorization [21, 22]. One in four respondents in our study did not  
40 believe doctors working in abortion services held positive attitudes towards unmarried  
41 women.  
42  
43  
44  
45  
46  
47  
48  
49  
50  
51  
52  
53  
54  
55  
56  
57  
58  
59  
60

1  
2  
3  
4  
5  
6  
7  
8  
9  
10  
11 Although nearly all students in our survey said they would like to assume the responsibility  
12 for contraceptive counselling in their future careers, the current shortage of providers  
13 (especially in rural areas) may require the shifting of tasks. Task sharing or shifting within  
14 family planning services is recommended by the WHO [23]. The involvement of clinical  
15 officers, midwives, and nurses increases the access to modern contraception in low resource  
16 settings [24]. The fact that one-fourth of our respondents believed that health workers, rather  
17 than physicians, were best suited to dispense contraceptive information suggests that future  
18 physicians would be willing to relegate such tasks to others.  
19  
20  
21  
22  
23

24  
25 Several studies conclude that even though abortion providers discuss contraception with their  
26 patients, it is common for patients to refuse any form of contraception following an abortion  
27 [25, 26]. The quality of provider counselling and patient education is important for the  
28 successful integration of new hormonal methods of contraception into clinical practice [27].  
29 Medical students need training in comprehensive sexual and reproductive health services that  
30 conforms with international human rights standards and include respect for privacy and  
31 confidentiality, in order to provide full and accurate information to their future patients.  
32  
33  
34  
35  
36  
37

### 38 **METHODOLOGICAL CONSIDERATIONS**

39  
40  
41 One weakness is the non-probability sampling technique applied in our study and this might  
42 reduce the external validity. The large sample size and the fact that a fairly high proportion of  
43 the total number of students from both private (47.5%) and public (26.0%) colleges from the  
44 state of Maharashtra are included strengthen the validity. However, since India is a country  
45 with large regional differences in socioeconomic and health status, our results may not be  
46 representative of all medical students in the country. On the other hand, the presence of  
47 students from public and private medical schools in both urban and semi-urban settings may  
48 strengthen the generalizability for Maharashtra. The method of using anonymous  
49  
50  
51  
52  
53

1  
2  
3  
4  
5  
6  
7  
8  
9  
10  
11 questionnaires is suitable for sensitive topics like sexual and reproductive health. The fact that  
12 the questionnaire was distributed before a lecture covering the subject under investigation  
13 might influence the result. However, the students' knowledge, perceptions, and attitudes  
14 reflect the content of their basic education program. The reliability and validity of the survey  
15 is strengthened through previous testing of the instrument.  
16  
17  
18  
19

## 20 CONCLUSIONS

21  
22  
23 We have found positive and negative attitudes towards modern contraceptive methods, sex  
24 education, and family planning counselling among medical students in India. There has been  
25 a willingness to offer sexual and reproductive health services to people regardless of their  
26 marital status. Still, medical students in Maharashtra have misconceptions about modern  
27 methods of contraception. Training in contraceptive counselling should be implemented in  
28 basic medical education in India in order to increase women's access to evidence-based  
29 maternal health care services.  
30  
31  
32  
33  
34  
35

## 36 Contributor statement

37  
38  
39 BE had the original idea of the study and developed the study protocol together with HO,  
40 KGD and MKA, whom developed the original questionnaire. HO entered the data and made  
41 first analysis together with SH who drafted the manuscript. All authors have contributed to  
42 writing and revising the final version of the manuscript and approved the submitted version.  
43  
44  
45

## 46 Acknowledgements

47  
48  
49 The study was funded by the Faculty of Medicine, Uppsala University, Sweden, and Sida  
50 (Swedish International Development Cooperation Agency). The data collection was made  
51 under a partner driven cooperation between Uppsala University and Ipas, New Delhi, India.  
52  
53

### Competing interests

The authors declare no competing interest

### Data sharing statement

There is no additional data available

### REFERENCES

- [1] Ahmed S, Li Q, Liu L, Tsui AO. Maternal deaths averted by contraceptive use: An analysis of 172 countries. *Lancet* 2012;380:111-25.
- [2] Collumbien M, Gerressu M, Cleland J. Non-use and use of ineffective methods of contraception. In: Ezzati M, Lopez AD, Rodgers A, Murray CJL, editors. *Comparative quantification of health risks: Global and regional burden of disease attributable to selected major risk factors*. Geneva: World Health Organization, 2004. p. 1255-320.
- [3] Marston C, Cleland J. Relationships between contraception and abortion: A review of the evidence. *Int Fam Plan Perspect* 2003;29:6-13.
- [4] Oringanje C, Meremikwu MM, Eko H, Esu E, Meremikwu A, Ehiri JE. Interventions for preventing unintended pregnancies among adolescents. *Cochrane Database Syst Rev* 2009:CD005215.
- [5] World Health Organization (WHO). *Unsafe abortion: global and regional estimates of the incidence of unsafe abortion and associated mortality in 2008*. 6th ed. Geneva: WHO, 2011.
- [6] World Health Organization (WHO). *Trends in maternal mortality: 1990 to 2010*. Geneva: WHO, 2012.
- [7] Parliament of India. *Medical termination of pregnancy act (MTP Act), Act No. 34 of 1971*. Revised version. Delhi: Commercial Law Publishers, 2010.

1  
2  
3  
4  
5  
6  
7  
8  
9  
10  
11 [8] Jejeebhoy SJ, Zavier AJF, Acharya R, Kalyanwala S. Increasing access to safe abortion in  
12 rural Maharashtra: Outcomes of a comprehensive abortion care model. New Delhi: Population  
13 Council, 2011.

14  
15 [9] Zavier AJ, Padmadas SS. Postabortion contraceptive use and method continuation in  
16 India. *Int J Gynaecol Obstet* 2012;118:65-70.

17  
18 [10] James KS. India's demographic change: opportunities and challenges. *Science*  
19 2011;333:576-80.

20  
21 [11] International Institute for Population Sciences (IIPS) and Macro International. National  
22 family health survey (NFHS-3), 2005-06: India. Volume 1. Mumbai: IIPS, 2007.

23  
24 [12] Cottingham J, Germain A, Hunt P. Use of human rights to meet the unmet need for  
25 family planning. *Lancet* 2012;380:172-80.

26  
27 [13] Koenig MA. The impact of quality of care on contraceptive use: Evidence from  
28 longitudinal data from rural Bangladesh. Baltimore: Johns Hopkins University, 2003.

29  
30 [14] Curtis S, Evens E, Sambisa W. Contraceptive discontinuation and unintended pregnancy:  
31 An imperfect relationship. *Int Perspect Sex Reprod Health* 2011;37:58-66.

32  
33 [15] Klingberg-Allvin M, Van Tam V, Nga NT, Ransjo-Arvidson A-B, Johansson A. Ethics  
34 of justice and ethics of care. Values and attitudes among midwifery students on adolescent  
35 sexuality and abortion in Vietnam and their implications for midwifery education: A survey  
36 by questionnaire and interview. *Int J Nurs Stud* 2007;44:37-46.

37  
38 [16] Government of India, Ministry of Home Affairs. Census of India 2011.  
39 <<http://www.censusindia.gov.in/default.aspx>> Accessed 20/08/2012

40  
41 [17] Supe A, Burdick WP. Challenges and issues in medical education in India. *Acad Med*  
42 2006;81:1076-80.

43  
44 [18] Spector PE. Summated rating scale construction. Sage University Paper Series on:  
45 Quantitative applications in the social sciences no 82. Newbury Park, CA: Sage, 1992.

- 1  
2  
3  
4  
5  
6  
7  
8  
9  
10  
11 [19] Steinauer JE, Turk JK, Fulton MC, Simonson KH, Landy U. The benefits of family  
12 planning training: a 10-year review of the Ryan Residency Training Program. *Contraception*.  
13 2013 Feb 24: S0010-7824  
14
- 15 [20] Nath A: HIV/AIDS and Indian youth—a review of the literature (1980-2008). *SAHARA*  
16 *J* 2009;6:2-8.  
17
- 18 [21] Brown SS, Burdette L, Rodriguez P. Looking inward: Provider-based barriers to  
19 contraception among teens and young adults. *Contraception* 2008;78:355-7.  
20
- 21 [22] Campbell M, Sahin-Hodoglugil NN, Potts M. Barriers to fertility regulation: A review of  
22 the literature. *Stud Fam Plann* 2006;37(2):87-98.  
23
- 24 [23] Mbizvo MT, Chou D, Shaw D. Today's evidence, tomorrow's agenda: implementation of  
25 strategies to improve global reproductive health. *Int J Gynaecol Obstet*. 2013 May;121 Suppl  
26 1:S3-8.  
27
- 28 [24] Jacobstein R, Curtis C, Spieler J, Radloff S. Meeting the need for modern contraception:  
29 effective solutions to a pressing global challenge. *Int J Gynaecol Obstet*. 2013 May;121 Suppl  
30 1:S9-15.  
31
- 32 [25] Jejeebhoy SJ, Kalyanwala S, Mundle S, et al. Feasibility of expanding the medication  
33 abortion provider base in India to include ayurvedic physicians and nurses. *Int Perspect Sex*  
34 *Reprod Health* 2012;38:133-42.  
35
- 36 [26] Acharya R, Kalyanwala S. Knowledge, attitudes, and practices of certified providers of  
37 medical abortion: Evidence from Bihar and Maharashtra, India. *Int J Gynaecol Obstet*  
38 2012;118 Suppl 1:S40-6.  
39
- 40 [27] Harper CC, Brown BA, Foster-Rosales A, Raine TR. Hormonal contraceptive method  
41 choice among young, low-income women: How important is the provider? *Patient Educ*  
42 *Counsel* 2010;81:349-54.  
43  
44  
45  
46  
47  
48  
49  
50  
51  
52  
53  
54  
55  
56  
57  
58  
59  
60



Table 1. Demographics of medical students in Maharashtra, India, 2011 (n = 1996). Data from 27 medical colleges (8 public, 19 private).

| Variable                  | n    | %    |
|---------------------------|------|------|
| Age                       |      |      |
| 20–24                     | 1886 | 94.4 |
| 25 and above              | 98   | 5.0  |
| Data missing              | 12   | 0.6  |
| Gender                    |      |      |
| Female                    | 860  | 43.1 |
| Male                      | 1134 | 56.8 |
| Data missing              | 2    | 0.1  |
| Place of birth/upbringing |      |      |
| Rural                     | 508  | 25.5 |
| Urban                     | 1444 | 72.3 |
| Data missing              | 44   | 2.2  |
| Religion                  |      |      |
| Hindu                     | 1747 | 87.7 |
| Muslim                    | 97   | 4.9  |
| Christian                 | 17   | 0.9  |
| Other                     | 133  | 6.7  |
| Data missing              | 2    | 0.1  |
| Marital status            |      |      |
| Single                    | 1970 | 98.7 |
| Married                   | 22   | 1.1  |
| Data missing              | 4    | 0.2  |
| Type of college           |      |      |
| Private                   | 1423 | 71.3 |
| Public                    | 573  | 28.7 |
| Data missing              | 0    | 0    |

Table 2. Perceptions of education and training in sexual and reproductive health among medical students (n = 1996) from private colleges (n = 1423) and public colleges (n = 573) in Maharashtra, India, 2011.

| Variable                                                                        | All<br>n (%) | Private<br>n (%) | Public<br>n (%) |
|---------------------------------------------------------------------------------|--------------|------------------|-----------------|
| Was sexual and reproductive health included in your curriculum?                 |              |                  |                 |
| Not at all                                                                      | 27 (1.4)     | 17 (1.2)         | 10 (1.8)        |
| Somewhat                                                                        | 468 (23.4)   | 352 (25.0)       | 116 (20.6)      |
| Sufficiently                                                                    | 1475 (73.9)  | 1039 (73.8)      | 436 (77.6)      |
| Data missing                                                                    | 26 (1.3)     |                  |                 |
| Have contraceptive methods been taught in your program?                         |              |                  |                 |
| Not at all                                                                      | 16 (0.8)     | 4 (0.3)          | 12 (2.1)        |
| Somewhat                                                                        | 199 (10.0)   | 143 (10.1)       | 56 (10.0)       |
| Sufficiently                                                                    | 1759 (88.1)  | 1265 (89.6)      | 494 (87.9)      |
| Data missing                                                                    | 22 (1.1)     |                  |                 |
| How do you assess your theoretical knowledge of sexual and reproductive health? |              |                  |                 |
| Poor                                                                            | 30 (1.5)     | 24 (1.7)         | 6 (1.1)         |
| Fair                                                                            | 552 (27.7)   | 381 (27.0)       | 171 (30.9)      |
| Good                                                                            | 1122 (56.2)  | 815 (57.8)       | 307 (55.4)      |
| Very good                                                                       | 260 (13.0)   | 190 (13.5)       | 70 (12.6)       |
| Data missing                                                                    | 32 (1.6)     |                  |                 |
| Have you had clinical practice in abortion care services during your training?  |              |                  |                 |
| Yes                                                                             | 268 (13.4)   | 196 (14.1)       | 72 (13.0)       |
| No                                                                              | 1678 (84.1)  | 1196 (85.9)      | 482 (87.0)      |
| Data missing                                                                    | 50 (2.5)     |                  |                 |

Table 3. Knowledge, attitudes, and perceptions on contraception among medical students (n = 1996) in Maharashtra, India, 2011.

| Statement                                                                            |   | Disagree Completely | Disagree | Neither | Agree | Agree completely | Missing |
|--------------------------------------------------------------------------------------|---|---------------------|----------|---------|-------|------------------|---------|
| Contraceptive pills might cause cancer                                               | n | 118                 | 267      | 170     | 1126  | 304              | 11      |
|                                                                                      | % | 5.9                 | 13.4     | 8.5     | 56.1  | 15.2             | 0.6     |
| Contraceptive pills can cause infertility                                            | n | 526                 | 857      | 227     | 349   | 25               | 12      |
|                                                                                      | % | 26.4                | 42.9     | 11.4    | 17.5  | 1.3              | 0.6     |
| Contraceptive pills are inconvenient to use                                          | n | 608                 | 855      | 236     | 249   | 38               | 10      |
|                                                                                      | % | 30.5                | 42.8     | 11.8    | 12.5  | 1.9              | 0.5     |
| Emergency contraceptive pills can be used several times a month                      | n | 972                 | 630      | 115     | 227   | 37               | 15      |
|                                                                                      | % | 48.7                | 31.6     | 5.8     | 11.4  | 1.9              | 0.8     |
| Condoms protect against STD/HIV                                                      | n | 30                  | 19       | 22      | 556   | 1361             | 8       |
|                                                                                      | % | 1.5                 | 1.0      | 1.1     | 27.9  | 68.2             | 0.4     |
| Traditional contraceptive methods (safe periods, withdrawal) are the best methods    | n | 647                 | 913      | 166     | 190   | 69               | 11      |
|                                                                                      | % | 32.4                | 45.7     | 8.3     | 9.5   | 3.5              | 0.6     |
| Contraceptive information should only be for married couples                         | n | 1305                | 566      | 57      | 41    | 20               | 7       |
|                                                                                      | % | 65.4                | 28.4     | 2.9     | 2.1   | 1.0              | 0.4     |
| Doctors working in abortion services have friendly attitudes towards unmarried women | n | 166                 | 346      | 559     | 695   | 215              | 15      |
|                                                                                      | % | 8.3                 | 17.3     | 28.0    | 34.8  | 10.8             | 0.8     |
| Married couples are shy to talk about contraception with each other                  | n | 150                 | 629      | 423     | 720   | 64               | 10      |
|                                                                                      | % | 7.5                 | 31.5     | 21.2    | 36.1  | 3.2              | 0.5     |
| Women feel confident discussing contraception with doctors                           | n | 86                  | 654      | 445     | 696   | 105              | 10      |
|                                                                                      | % | 4.3                 | 32.8     | 22.3    | 34.9  | 5.3              | 0.5     |
| Traditional values are barriers for sex education in India                           | n | 72                  | 137      | 116     | 939   | 722              | 10      |
|                                                                                      | % | 3.6                 | 6.9      | 5.8     | 47.0  | 36.2             | 0.5     |
| Sex education encourages unmarried people to have sex                                | n | 536                 | 824      | 329     | 232   | 68               | 7       |
|                                                                                      | % | 26.9                | 41.3     | 16.5    | 11.6  | 3.4              | 0.4     |

Table 4. Place of birth in relation to knowledge, attitudes, and perceptions on contraception. Summary of significant differences among medical students (n=1996) in Maharashtra, India, 2011.

| Statement                                                                            | Place of birth | Agree or agree completely<br>n <sup>a</sup> (%) | 95% Confidence Interval |
|--------------------------------------------------------------------------------------|----------------|-------------------------------------------------|-------------------------|
| Contraceptive pills might cause cancer                                               | Rural          | 344 (66.4)                                      | 62.2–70.5               |
|                                                                                      | Urban          | 1081 (74.1)                                     | 71.8–76.4               |
| Doctors working in abortion services have friendly attitudes towards unmarried women | Rural          | 289 (55.9)                                      | 51.5–60.2               |
|                                                                                      | Urban          | 617 (42.4)                                      | 39.8–45.0               |
| Sex education encourages unmarried people to have sex                                | Rural          | 105 (20.2)                                      | 16.9–24.0               |
|                                                                                      | Urban          | 193 (13.2)                                      | 11.5–15.1               |

<sup>a</sup>Number of students does not always total 1996 due to missing answers

Table 5. Comparison of male and female medical students' knowledge, attitudes, and perceptions towards contraception (n = 1996) in Maharashtra, India, 2011.

| Statement                                                                                   | Sex | Agree or agree completely<br>n <sup>a</sup> (%) | 95% Confidence Interval |
|---------------------------------------------------------------------------------------------|-----|-------------------------------------------------|-------------------------|
| <b>Contraceptive pills might cause cancer<sup>b</sup></b>                                   | F   | <b>652 (77.1)</b>                               | <b>74.1–79.9</b>        |
|                                                                                             | M   | <b>753 (68.0)</b>                               | <b>65.2–70.8</b>        |
| Contraceptive pills can cause infertility                                                   | F   | 150 (17.7)                                      | 15.2–20.4               |
|                                                                                             | M   | 216 (19.5)                                      | 17.2–22.0               |
| Contraceptive pills are inconvenient to use                                                 | F   | 132 (15.6)                                      | 13.2–18.2               |
|                                                                                             | M   | 149 (13.4)                                      | 11.5–15.6               |
| <b>Emergency contraceptive pills can be used several times a month</b>                      | F   | <b>76 (9.0)</b>                                 | <b>7.2–11.1</b>         |
|                                                                                             | M   | <b>182 (16.5)</b>                               | <b>14.3–18.8</b>        |
| <b>Condoms protect against STD/HIV</b>                                                      | F   | <b>830 (97.9)</b>                               | <b>96.7–98.7</b>        |
|                                                                                             | M   | <b>1056 (95.3)</b>                              | <b>93.9–96.5</b>        |
| Traditional contraceptive methods (safe periods, withdrawal) are the best methods           | F   | 90 (10.7)                                       | 8.7–12.9                |
|                                                                                             | M   | 163 (14.7)                                      | 12.7–16.9               |
| Contraceptive information should only be for married couples                                | F   | 22 (2.6)                                        | 1.6–3.9                 |
|                                                                                             | M   | 37 (3.3)                                        | 2.4–4.6                 |
| <b>Doctors working in abortion services have friendly attitudes towards unmarried women</b> | F   | <b>326 (38.5)</b>                               | <b>35.2–41.9</b>        |
|                                                                                             | M   | <b>569 (51.4)</b>                               | <b>48.4–54.4</b>        |
| Married couples are shy to talk about contraception with each other                         | F   | 311 (36.7)                                      | 33.5–40.1               |
|                                                                                             | M   | 462 (41.7)                                      | 38.8–44.7               |
| Women feel confident discussing contraception with doctors                                  | F   | 350 (41.3)                                      | 37.9–44.7               |
|                                                                                             | M   | 438 (39.5)                                      | 36.6–42.5               |
| Traditional values are barriers for sex education in India                                  | F   | 718 (84.8)                                      | 82.2–87.1               |
|                                                                                             | M   | 920 (83.0)                                      | 80.6–85.1               |
| <b>Sex education encourages unmarried people to have sex</b>                                | F   | <b>88 (10.4)</b>                                | <b>8.4–12.6</b>         |
|                                                                                             | M   | <b>209 (18.8)</b>                               | <b>16.6–21.3</b>        |

<sup>a</sup>Number of students does not always total 1996 due to missing answers

<sup>b</sup>**Bold** indicates significant differences

1  
2  
3  
4  
5  
6  
7  
8  
9  
10  
11  
12  
13  
14  
15  
16  
17  
18  
19  
20  
21  
22  
23  
24  
25  
26  
27  
28  
29  
30  
31  
32  
33  
34  
35  
36  
37  
38  
39  
40  
41  
42  
43  
44  
45  
46  
47  
48  
49  
50  
51  
52  
53  
54  
55  
56  
57  
58  
59  
60

Title: ~~Medical students' Future physicians'~~ knowledge, attitudes, and perceptions on  
contraceptive use and counselling: a cross-sectional survey ~~among medical interns students~~ in  
Maharashtra, India

Sara Hogmark, MD, Dept. of Obstetrics and Gynaecology, Falu County Hospital, Falun,  
Sweden; Dept. of Women's and Children's Health (IMCH), Uppsala University, Sweden

Marie Klingberg-Allvin, Senior Lecturer, Dept. of Women's and Children's Health, Uppsala  
University; Dept. of Women's and Children's Health, Karolinska Institutet; School of Social  
and Health Science, Dalarna University, Sweden

Hannes Ohlsson, MD, Dept. of Women's and Children's Health (IMCH), Uppsala University,  
Sweden

Kristina Gemzell-Danielsson, Professor, Dept. of Women's and Children's Health,  
Karolinska Institutet, Sweden

Birgitta Essén, Asst. Prof., Dept. of Women's and Children's Health (IMCH), Uppsala  
University, Sweden

Corresponding Author: Sara Hogmark, Dept. of Obstetrics and Gynaecology, Falu County  
Hospital, 79182 Falun, Sweden

Phone: 046-(0)23-492000 E-mail: [sara.hogmark@ltdalarna.se](mailto:sara.hogmark@ltdalarna.se)

Keywords: contraceptives, medical students, India, reproductive health, cross sectional survey

Word count: ~~24802861~~ (excluding abstract and references)

1

Formatted: French (France)

Field Code Changed

Formatted: French (France)

Formatted: French (France)

### Article focus

Contraceptive use is an effective primary prevention strategy to avoid unintended pregnancies and unsafe abortions and thus reduces maternal mortality and morbidity.

This study aimed to investigate knowledge, attitudes and perceptions on contraceptive use and counselling among medical students future physicians in Maharashtra, India.

### Key message points

Despite mostly positive attitudes towards modern contraceptives, sex education, and family planning counselling, medical students future physicians in Maharashtra have fair knowledge and show misconceptions about modern contraceptives, and lack training in family planning services.

Respondents expressed a desire to provide sexual and reproductive health services to people regardless of their marital status.

Pre and in service training in evidence based contraceptive counselling should be implemented in order to increase the access to comprehensive family planning services decrease unplanned pregnancies and unsafe abortions in India.

### Strengths and Limitations

This study contributes with important evidence that may be used to revise pre and in service training in contraceptive counselling and thus reduce maternal mortality related to unintended pregnancies in India.

Important limitation with this study is the non probability sampling technique applied and this might reduce the external validity.

The large sample size and the high proportion of the total number and the presence of medical interns students from public and private medical schools in both urban and semi urban settings strengthen the generalizability.

## ABSTRACT

*Objectives:* This study aimed to investigate knowledge, attitudes and perceptions on contraceptive use and counselling among medical students in Maharashtra, India.

*Setting: Background:* Considerable global maternal mortality and morbidity could be avoided through the use of effective contraception. In India, contraception services are frequently unavailable or there are obstacles to obtaining modern, reversible contraceptives. ~~This study aimed to investigate knowledge, attitudes and perceptions on contraceptive use and counselling among medical students future physicians in Maharashtra, India.~~

*Participants Study design:* A cross-sectional descriptive study using a self-administered questionnaire was conducted among 1996 medical ~~interns students~~ in their fifth year of study at 27 medical colleges in the state of Maharashtra, India. Descriptive and analytical statistics interpreted the survey instrument and significant results were presented with a 95% confidence interval.

*Results:* Respondents expressed the desire to provide contraceptive services ~~and individual counselling.~~ ~~Few had experienced training in abortion care.~~ ~~They had a fair knowledge of contraception, but showed some~~ There were misconceptions about modern contraceptive methods and the impact of sex education. Attitudes towards contraception were mainly positive, pre-marital counselling was supported, and the influence of traditional values and negative provider attitudes on services was recognized. Gender, area of upbringing, and type of medical college did not change the results.

*Conclusions:* Despite mostly positive attitudes towards modern contraceptives, sex education, and family planning counselling, future physicians in Maharashtra have fair knowledge and show misconceptions about modern contraceptives and myths prevail. Pre- and in-service training in contraceptive counselling should be implemented in order to increase women's access to evidence-based maternal health care services. ~~Pre and in service training of providers in evidence based contraceptive counselling would decrease unplanned pregnancies and reduce unsafe abortions in the region studied.~~ Expanding the provider base to health care professionals other than physicians would further increase the availability of services.

Formatted: Line spacing: single

Formatted: Font: Italic

Formatted: Font: Italic



### **Article focus**

Contraceptive use is an effective primary prevention strategy to avoid unintended pregnancies and unsafe abortions and thus reduces maternal mortality and morbidity.

This study aimed to investigate knowledge, attitudes and perceptions on contraceptive use and counselling among medical students in Maharashtra, India.

### **Key message points**

Despite mostly positive attitudes towards modern contraceptives, sex education, and family planning counselling, medical students in Maharashtra show misconceptions about modern contraceptives, and lack training in family planning services.

Respondents expressed a desire to provide sexual and reproductive health services to people regardless of their marital status.

Pre- and in-service training in evidence-based contraceptive counselling should be implemented in order to increase the access to comprehensive family planning services in India.

### **Strengths and Limitations**

This study contributes with important evidence that may be used to revise pre- and in service training in contraceptive counselling and thus reduce maternal mortality related to unintended pregnancies in India.

Important limitation with this study is the non-probability sampling technique applied and this might reduce the external validity.

The large sample size and the high proportion of the total number and the presence of medical students from public and private medical schools in both urban and semi-urban settings strengthen the generalizability.

1  
2  
3  
4  
5  
6  
7  
8  
9  
10  
11  
12  
13  
14  
15  
16  
17  
18  
19  
20  
21  
22  
23  
24  
25  
26  
27  
28  
29  
30  
31  
32  
33  
34  
35  
36  
37  
38  
39  
40  
41  
42  
43  
44  
45  
46  
47  
48  
49  
50  
51  
52  
53  
54  
55  
56  
57  
58  
59  
60

## INTRODUCTION

Contraceptive use is an effective primary prevention strategy for reducing maternal mortality [1]. It has been estimated that the use of effective contraception could avert 90% of abortion-related and more than 20% of obstetric-related mortality globally [2]. Abortion incidence is inversely associated with the level of contraceptive use, especially where fertility rates are stable [3]. In addition, comprehensive sex education has the potential to prevent unintended pregnancies that lead to unsafe abortions [4]. ~~The growing number of people of reproductive age in developing countries poses a challenge for family planning programmes and health care services.~~ In order to meet the increasing demand for contraceptives and ensure the sexual and reproductive health and rights of women, including the right to planned parenthood, intensified efforts are urgently needed [5].

India accounts for 20% of maternal deaths worldwide. ~~Every year, nearly 60,000 women in India die from complications related to pregnancy~~ [6]. ~~Approximately 6.7 million induced abortions take place in India annually.~~ Despite the fact that induced abortion has been legal in India since 1971 [7], most ~~of the approximately 6.7 million annually induced~~ abortions are performed in an unsafe manner ~~and put women's health and lives at risk~~ [7, 8]. Moreover, a recent study concluded that 70% of all Indian women who have an abortion do not use post-abortion contraception [9]. The unmet need for ~~family planning among married women is 14%.~~ ~~The overall unmet need for~~ modern contraceptives is 22% in the cities and higher in rural areas. ~~Among married women in India, 56% use some form of contraception and 49% use a modern method.~~ Female sterilization is the most common contraceptive practice and accounts for 75% of all methods used [10]. The use of reversible, modern methods in order to postpone birth of a first child or for spacing births is infrequent: ~~male condoms are used by 5%, the pill 3%, IUD 2%, injection 1%, and male sterilisation 1%~~ [11].

Some of the barriers that impede women's access to contraception are health care providers who are inadequately trained, insufficient in number, and poorly supervised [12]. Studies have shown that improving quality of care increases and sustains contraceptive use by women

1  
2  
3  
4  
5  
6  
7  
8  
9  
10  
11 [13]. Providers need adequate knowledge of contraceptive methods and training in  
12 counselling skills in order to provide reliable information to women ~~to avoid unintended~~  
13 ~~pregnancy~~ [14]. Despite the availability of effective methods of contraception in India, many  
14 pregnancies remain ~~unplanned and~~ unintended. Considering the future role of medical  
15 ~~students and interns~~ students as contraceptive counsellors, little is known about their views on  
16 contraceptive methods, use or counselling. This study aimed to investigate knowledge,  
17 attitudes, -and perceptions on contraceptive use and counselling among medical students  
18 ~~future physicians~~ in Maharashtra, India.  
19  
20  
21  
22  
23  
24  
25  
26  
27  
28  
29  
30  
31  
32  
33  
34  
35  
36  
37  
38  
39  
40  
41  
42  
43  
44  
45  
46  
47  
48  
49  
50  
51  
52  
53  
54  
55  
56  
57  
58  
59  
60

## MATERIALS AND METHODS

In February 2011, a cross-sectional survey was conducted using a pre-tested, self-administered questionnaire in the Indian state of Maharashtra among 1,996 medical students in their fifth year (internship) of training [15]. Out of a total of 43 medical colleges in Maharashtra (5,195 students), 19 are Public (2,200 students). A convenience sample of 27 colleges (8 government public, 55673 students; 19 private, 1,40223 students) was included in the study. All medical interns students at the selected institutions were asked to participate before attending they were to take a lecture pre-service CAC orientation program in comprehensive abortion care (CAC). The lecture was The CAC program was organized by a non-governmental organization organized but part of within the within the medical ir- educationnal and training program and organized by an NGO. In the State of Maharashtra out of 43 medical colleges (5195 students) 19 are Public (2200 students). In total 27 colleges (8- public, 19 private) were included in the study and 1423 and 573 students participated from private and public colleges respectively.

### Study setting

Maharashtra is located in west-central India. It Maharashtra is the country's second most populous state and the third largest by area. Of its 112 million inhabitants, a slight majority live in rural areas. Mumbai, India's largest city, is the capital of the state. Maharashtra's socio-economic status, literacy rate, and health infrastructure are better than the national average [16]. Medical education in India is regulated by the Medical Council of India and is either public or private. Medical education consists of 4.5 years of theoretical studies followed by one year of internship. According to the national medical education curriculum for medical education the theoretical studies should cover both comprehensive abortion care, as well as CAC and contraceptive methods, and counselling, which includes a two-month rotation in obstetrics/gynaecology and three months of community medicine [17].

### Instrument

Formatted: Font: No underline, Font color: Auto

Formatted: Font: No underline

Formatted: Font: No underline, Font color: Auto

1  
2  
3  
4  
5  
6  
7  
8  
9  
10  
11 The questionnaire contained three sections. Section 1 included socio-demographic  
12 characteristics as gender, age, religion, marital status, place of birth/area of upbringing, and  
13 type of college. Section 2 included questions related to perception of education and training in  
14 sexual and reproductive health~~previous coursework and training~~, and respondents' assessment  
15 of their knowledge regarding the medical curriculum and questions concerning perceptions of  
16 contraceptive methods and services.  
17  
18  
19

20  
21 Section 3 consisted of twelve statements on different aspects of contraceptive methods,  
22 services, and values surrounding sexual and reproductive health. Participants were asked to  
23 circle the most appropriate alternative on a five-point Likert scale (Disagree  
24 completely/Disagree/Neither agree nor disagree/Agree/Agree completely) [18].  
25  
26

### 27 **Statistical analysis**

28  
29  
30 Questionnaires that contained one or more answers were included in the analysis. Statistical  
31 Package for Social Studies (SPSS) 20.0 software was used. Descriptive statistics were applied  
32 to all sections of the questionnaire; actual numbers and proportions were calculated; and  
33 cross-tabulations with intergroup comparisons of answers were made for ~~interns-students~~ of  
34 different genders, types of colleges, and places of birth. The alternatives 'agree' and 'agree  
35 completely' were aggregated, as well as the alternatives 'disagree' and 'disagree completely'.  
36 Any difference with a 95% confidence interval (CI) was regarded as significant.  
37  
38  
39

### 40 **Ethical considerations**

41  
42  
43 The study was carried out in compliance with the principles of the World Medical Association  
44 Declaration of Helsinki. The medical ~~interns-students~~ eligible for participation in the study  
45 were given oral information about the study and were informed that participation was  
46 anonymous and voluntary and that choosing not to participate would not affect their studies or  
47 future careers negatively. By filling in the questionnaire written consent to participation was  
48 given. Permission to conduct the survey in connection with the training programme was  
49  
50  
51  
52

1  
2  
3  
4  
5  
6  
7  
8  
9  
10  
11  
12  
13  
14  
15  
16  
17  
18  
19  
20  
21  
22  
23  
24  
25  
26  
27  
28  
29  
30  
31  
32  
33  
34  
35  
36  
37  
38  
39  
40  
41  
42  
43  
44  
45  
46  
47  
48  
49  
50  
51  
52  
53  
54  
55  
56  
57  
58  
59  
60

obtained from the principal at each college. The study has been approved by the research ethical committee at Karolinska Institutet (Dnr: 2013/415-31/4).

Formatted: Font: English (U.S.)

## RESULTS

Out of 2,006 questionnaires, 1,996 were at least partially filled-in, making the overall response rate 99.5%. The demographic characteristics of the interns-students are outlined in Table 1. Since the interns-students were homogenous in terms of age, religion, and marital status, the variables remaining for inter-group comparisons were gender (56.87% male, 43.1% female), place of birth (72.3% urban, 25.5% rural), and type of college (71.3% private, 28.79% public).

Table 2 shows the students' perception of education and training in sexual and reproductive health, and respondents' assessment of their knowledge regarding contraceptive methods and services, ~~interns-students' perceptions on coursework and training on sexual and reproductive health, and their own assessment of knowledge~~. Most of the interns-students thought that the topic of reproductive health had been adequately covered in their curriculum, including contraceptive methods. A majority considered their theoretical knowledge in sexual and reproductive health fair or good. A large proportion reported having had no clinical practice in abortion care services during their training. A comparison between interns-students from private and public colleges revealed no significant differences.

With regard to contraceptive counselling, 74.0% believed it should be given individually and not in a group. A majority of the respondents (67.2%) thought doctors should be the ones to provide contraception to patients, while 27.1% considered health workers to be the most appropriate counsellors. A few interns-students chose other alternatives (nurse 3.0%, other 1.6%, missing 1.1%). A majority (95.1%) indicated they would like to have responsibility for providing information on contraception as future doctors. Regarding the use of oral contraceptives, 88.59% of the interns-students stated they should be taken every day. Some interns-students (5.86%) thought they were to be taken after intercourse or once a month

(3.4%). A cross-sectional analysis of answers given by interns-students with rural versus urban places of birth revealed no significant differences with regard to contraceptive-counsellingthese results. However, those from private colleges preferred individual contraceptive counselling over group counselling (private college interns-students 78.2%, CI 95%, 75.9–80.3; public college interns-students 70.64%, CI 95%, 66.6–74.4). Female interns-students were also more supportive of individual counselling than males (females 80.2%, CI 95%, 77.4–82.9; males 72.83%, CI 95%, 70.1–75.4). Females also expressed a greater interest in having responsibility for providing contraceptive information as future doctors than males (females 98.2%, CI 95%, 96.8–98.8; males 95.3% CI, 93.8–96.4). Moreover, female interns-students were better informed on the daily intake of oral contraceptive pills than males (females 93.3%, CI 95%, 91.5–94.9; males 88.89%, CI 95%, 86.8–90.6).

The knowledge, attitudes, and perceptions of medical interns-students on contraceptive methods, services, and values surrounding sexual and reproductive health are shown in Table

3. Cross-sectional analysis comparing interns-students from public and private colleges indicated a difference of opinion regarding the statement “Doctors working in abortion service have friendly attitudes towards unmarried women”. Fewer interns-students from private colleges agreed or agreed completely as compared to interns-students from public colleges (private college interns-students 43.84%, CI 95%, 41.8–46.4; public college interns-students 51.2%, CI 95%, 47.0–51.4).

Table 4 summarizes the significant differences in perceptions found among internsstudents based on their place. A comparison of the answers based on the interns' place-of birth (urban or rural) revealed significant differences in responses to three statements: InternsStudents with urban place of birth to a higher extent agreed to that “Contraceptive pills might cause cancer” (urban 74.1%, CI 95%, 71.8–76.4; rural 66.4%, CI 95%, 62.2–70.5); A larger proportion of internsstudents with rural background agreed to the statement that “Doctors working in abortion service have friendly attitudes towards unmarried women” (rural 55.9%, CI 95%, 51.6-60.2; urban 42.4, CI 95%, 39.8– 45.0); and it was more common for internsstudents with rural place of birth to agree to the statement “Sex education encourages

unmarried people to have sex” (rural 20.2%, CI 95%, 16.9–24.0; urban 13.2, CI 95%, 11.5–15.1) (Table 4).

Table 5 compares male and female medical ~~interns’ students’~~ knowledge, attitudes, and perceptions on contraception. More female ~~interns students~~ agreed or agreed completely that contraceptive pills might cause cancer. Males tended to believe that emergency contraceptive pills may be used several times a month. Both male and female ~~interns students~~ largely agreed or agreed completely that condoms protect against sexually transmitted diseases (STD) and HIV, although females were significantly more supportive of their use. One in five males versus one in ten females agreed or agreed completely that sex education encourages unmarried people to have sex. Among males, 51.40% agreed or agreed completely that doctors working in abortion services have friendly attitudes towards unmarried women, compared to 38.59% among females.

## DISCUSSION

~~The major finding in this study is the inadequate level of education and training in CAC comprehensive abortion care and contraceptive methods counselling although the of medical students’s who already have undertaken passed the full theoretical parts of the their program medical education. Our findings further suggest that even though although the medical interns students surveyed had experienced little training in abortion care services, they expressed a clear interest in disseminating contraceptive information as future physicians. Although they had mostly a fair knowledge and a positive attitudes toward contraception and pre-marital counselling, they also had misconceptions about modern contraceptive methods and the impact of sex education were common.~~

~~Recent studies indicate that family planning training during residency improves future physicians’ proficiency in contraceptive counselling [19]. Few had experienced clinical training in abortion care services. They recognized the influence of traditional values and~~

Formatted: Font: Not Italic

Formatted: Font: Not Italic, English (U.S.)



~~negative provider attitudes regarding contraceptive services, and they expressed a clear interest in disseminating contraceptive information as future physicians.~~

~~Very few respondents in our study had had any clinical experience in abortion care services, yet a majority thought the topics of sexual and reproductive health and contraceptive methods had been adequately covered in their coursework. Still, nearly one in five interns falsely believed that contraceptive pills can cause infertility and one in ten did not know that contraceptive pills are to be taken on a daily basis. More females than males were unaware that emergency contraceptive pills may be used several times a month. A majority of both males and females perceived that contraceptive pills might cause cancer, although females were more likely to agree on this. Recent studies indicate that family planning training during residency improves future physicians' proficiency in contraceptive counselling [19]. Recent studies indicate that family planning training during residency improves future physicians' proficiency in both uterine evacuation and contraceptive counselling [19].~~

Our findings did not reveal any differences in self-rated or theoretical knowledge between public and private college ~~interns~~ students. The background factor that had the greatest influence on knowledge was gender. Female ~~interns~~ students were better informed about the ~~dosage utilisation~~ of oral contraceptives and the protection that condoms offer against STD/HIV. They also report that sex education does not encourage unmarried people to have sex. Regardless of demographic background, most ~~interns~~ students in our study recognized that traditional values are barriers to sex education. Few thought contraceptive information should only be provided to married couples, although ~~interns~~ students born in rural areas had more negative perceptions of sex education. The socio-cultural norms of Indian society contribute to making sex-related issues taboo and hinder young people from seeking counselling regarding sexual health. ~~At the same time, premarital sex is increasing among Indian youth [20]. Indian women have limited power to decide about birth control. The preference for a male child, which still strongly prevails in India, also has an influence on reproductive behaviour. Reducing such a preference would require a change in social norms and an improvement in the status of women [32]. Two recent studies from rural India may~~

1  
2  
3  
4  
5  
6  
7  
8  
9  
10  
11  
12  
13  
14  
15  
16  
17  
18  
19  
20  
21  
22  
23  
24  
25  
26  
27  
28  
29  
30  
31  
32  
33  
34  
35  
36  
37  
38  
39  
40  
41  
42  
43  
44  
45  
46  
47  
48  
49  
50  
51  
52  
53  
54  
55  
56  
57  
58  
59  
60

~~indicate a change in attitude. In the first, nearly one third of young married women without children were found to be using contraceptives [23]. The second study found growing autonomy among young couples in using contraception to space births, even when this conflicted with the views of their mothers in law [33]. Although comprehensive sex education has been shown to have a positive impact on young people's risky sexual behaviour [21], in parts of India sex education has been banned in schools [20]. Young people in India have expressed a desire for formal sex education and doctors are their preferred source of advice [22]. India is known to have negative attitudes toward pre-marital sex and a reluctance to provide married couples with contraceptives before they have had at least one child [23].~~

~~Other research reveals that health care providers often impose unnecessary barriers in dispensing contraceptives, including denial of a contraceptive method on the basis of age, parity, marital status, or lack of parental or spousal authorization [214, 225]. A review of studies from developing countries indicates a similar pattern [25]. One in four respondents in our study did not believe doctors working in abortion services held positive attitudes towards unmarried women. However, as noted above, most interns supported providing contraceptive information to unmarried couples.~~

~~Females expressed a slightly greater interest in working with contraceptive services in their medical practice than males. Although nearly all interns-students in our survey said they would like to assume the responsibility for contraceptive counselling in their future careers, the current shortage of providers (especially in rural areas) may require the shifting of tasks.~~

~~Task sharing or sharing and task-shifting within family planning services is recommended by the World Health Organization WHO [236]. The involvement of clinical officers, midwives and nurses increases the equitable access to modern contraception among women in low resource settings [247]. The fact that one-fourth of our respondents believed that health workers, rather than physicians, were best suited to dispense contraceptive information suggests that future physicians-doctors would be willing to relegate such tasks to others. This might overcome the present inequalities in access to reproductive health services in India [28].~~

1  
2  
3  
4  
5  
6  
7  
8  
9  
10  
11 A recent study suggests that the inclusion of nurses, midwives, and ayurvedic physicians in  
12 medical abortion care is feasible in India [29]. Broadening of the provider base for family  
13 planning services would be a pragmatic response to the current shortage especially in rural  
14 area of India. Several studies conclude that even though abortion providers discuss  
15 contraception with their patients and advise them about a range of methods, it is common for  
16 patients to refuse any form of contraception following an abortion [2530, 2631]. Indian  
17 women have limited power to decide about birth control. The preference for a male child,  
18 which still strongly prevails in India, also has an influence on reproductive behaviour.  
19 Reducing such a preference would require a change in social norms and an improvement in  
20 the status of women [32]. Two recent studies from rural India may indicate a change in  
21 attitude. In the first, nearly one third of young married women without children were found to  
22 be using contraceptives; 10% were using condoms to postpone having their first child [23].  
23 The second study found growing autonomy among young couples in using contraception to  
24 space births, even when this conflicted with the views of their mothers-in-law [33].  
25  
26  
27  
28  
29  
30  
31

32 The quality of provider counselling and patient education is important for the successful  
33 integration of new hormonal methods of contraception into clinical practice [2734]. Medical  
34 students need training in comprehensive sexual and reproductive health services should that  
35 conforms with international human rights standards and include respect for privacy and  
36 confidentiality, in order to provide full and accurate information to their future patients, and  
37 ensure free and informed consent [11].  
38  
39  
40  
41

42 India has one of the most privatized medical systems in the world. The public system, which  
43 provides health care for the poor, employs only two physicians and eight nurses per 10,000  
44 population [35]. The strategic use of nurses and midwives has been described to contribute to  
45 mitigating human resource problems in emergency obstetric and gynecological care [36].  
46 There is evidence from developing countries that trained nurses and midwives can replace  
47 doctors in many settings [37], yet medical doctors are still the dominant providers of  
48 contraceptive services in India. Strategies' identified to cover critical gaps in access to  
49 reproductive health are: integrated family planning with postpartum and abortion care, pre-  
50  
51  
52  
53  
54

1  
2  
3  
4  
5  
6  
7  
8  
9  
10  
11  
12  
13  
14  
15  
16  
17  
18  
19  
20  
21  
22  
23  
24  
25  
26  
27  
28  
29  
30  
31  
32  
33  
34  
35  
36  
37  
38  
39  
40  
41  
42  
43  
44  
45  
46  
47  
48  
49  
50  
51  
52  
53  
54  
55  
56  
57  
58  
59  
60

~~and in-service training on evidence based contraception and task shift and sharing between physicians and midwives and nurses [38].~~

## METHODOLOGICAL CONSIDERATIONS

One weakness is the non-probability sampling technique applied in our study and this might reduce the external validity. The large sample size and the fact that a fairly high proportion of the total number of students in both private (47.550%) and public (26.0%) colleges is included are thought to strengthen the validity. However, since India is a country with large regional differences in socioeconomic and health status, our results may not be representative of all medical ~~interns students~~ in the country. On the other hand, the presence of ~~interns students~~ from public and private medical schools in both urban and semi-urban settings may strengthen the generalizability for Maharashtra. The method of using anonymous questionnaires is suitable for sensitive topics like sexual and reproductive health. The reliability and validity of the survey is strengthened through previous testing of the instrument.

## CONCLUSIONS

We have found positive and negative attitudes towards modern contraceptive methods, sex education, and family planning counselling among future physicians in India. There has been a willingness to offer sexual and reproductive health services to people regardless of their marital status. ~~Despite positive attitudes towards modern contraceptives, sex education, and family planning counselling~~ Still, future physicians in Maharashtra have fair knowledge and ~~misconceptions about modern contraceptives and myths prevail.~~ Pre and in-service training in contraceptive counselling should be implemented in order to increase women's access to evidence-based maternal health care services. Expanding the provider base to health care professionals other than physicians would further increase the availability of services.

~~Pre and in-service training in evidence based contraceptive counselling would decrease unplanned pregnancies and unsafe abortions in India. Expansion of the provider base to~~

~~include categories of health care staff other than physicians as purveyors of contraceptive information could increase access to services.~~

### Contributor statement

BE had the original idea of the study and developed the study protocol together with HO, KGD and MKA, whom developed the original questionnaire. HO entered the data and made first analysis together with SH who wrote the first draft. All authors contributed to the final version of the manuscript.

### Acknowledgements

The study was funded by the Faculty of Medicine, Uppsala University, [Sweden](#) and Sida (Swedish International Development Cooperation Agency). The data collection was made under ~~the a partner driven~~ cooperation between Uppsala University and Ipas, New Delhi, India.

### Competing interests

The authors declare no competing interests

### Data sharing statement

There is no additional data available

### REFERENCES

[1] Ahmed S, Li Q, Liu L, Tsui AO. Maternal deaths averted by contraceptive use: An analysis of 172 countries. *Lancet* 2012;380:111-25.

[2] Collumbien M, Gerressu M, Cleland J. Non-use and use of ineffective methods of contraception. In: Ezzati M, Lopez AD, Rodgers A, Murray CJL, editors. *Comparative quantification of health risks: Global and regional burden of disease attributable to selected major risk factors*. Geneva: World Health Organization, 2004. p. 1255-320.

1  
2  
3  
4  
5  
6  
7  
8  
9  
10  
11  
12  
13  
14  
15  
16  
17  
18  
19  
20  
21  
22  
23  
24  
25  
26  
27  
28  
29  
30  
31  
32  
33  
34  
35  
36  
37  
38  
39  
40  
41  
42  
43  
44  
45  
46  
47  
48  
49  
50  
51  
52  
53  
54  
55  
56  
57  
58  
59  
60

[3] Marston C, Cleland J. Relationships between contraception and abortion: A review of the evidence. *Int Fam Plan Perspect* 2003;29:6-13.

Formatted: German (Germany)

[4] Oringanje C, Meremikwu MM, Eko H, Esu E, Meremikwu A, Ehiri JE. Interventions for preventing unintended pregnancies among adolescents. *Cochrane Database Syst Rev* 2009:CD005215.

Formatted: German (Germany)

Formatted: German (Germany)

[5] World Health Organization (WHO). *Unsafe abortion: global and regional estimates of the incidence of unsafe abortion and associated mortality in 2008*. 6th ed. Geneva: WHO, 2011.

[6] World Health Organization (WHO). *Trends in maternal mortality: 1990 to 2010*. Geneva: WHO, 2012.

[7] Parliament of India. *Medical termination of pregnancy act (MTP Act), Act No. 34 of 1971*. Revised version. Delhi: Commercial Law Publishers, 2010.

[8] Jejeebhoy SJ, Zavier AJF, Acharya R, Kalyanwala S. *Increasing access to safe abortion in rural Maharashtra: Outcomes of a comprehensive abortion care model*. New Delhi: Population Council, 2011.

[9] Zavier AJ, Padmadas SS. Postabortion contraceptive use and method continuation in India. *Int J Gynaecol Obstet* 2012;118:65-70.

[10] James KS. India's demographic change: opportunities and challenges. *Science* 2011;333:576-80.

[11] International Institute for Population Sciences (IIPS) and Macro International. *National family health survey (NFHS-3), 2005-06: India. Volume 1*. Mumbai: IIPS, 2007.

[12] Cottingham J, Germain A, Hunt P. Use of human rights to meet the unmet need for family planning. *Lancet* 2012;380:172-80.

[13] Koenig MA. *The impact of quality of care on contraceptive use: Evidence from longitudinal data from rural Bangladesh*. Baltimore: Johns Hopkins University, 2003.

[14] Curtis S, Evens E, Sambisa W. Contraceptive discontinuation and unintended pregnancy: An imperfect relationship. *Int Perspect Sex Reprod Health* 2011;37:58-66.

[15] Klingberg-Allvin M, Van Tam V, Nga NT, Ransjo-Arvidson A-B, Johansson A. Ethics of justice and ethics of care. Values and attitudes among midwifery students on adolescent sexuality and abortion in Vietnam and their implications for midwifery education: A survey by questionnaire and interview. *Int J Nurs Stud* 2007;44:37-46.

[16] Government of India, Ministry of Home Affairs. Census of India 2011. <<http://www.censusindia.gov.in/default.aspx>> Accessed 20/08/2012

[17] Supe A, Burdick WP. Challenges and issues in medical education in India. *Acad Med* 2006;81:1076-80.

[18] Spector PE. Summated rating scale construction. Sage University Paper Series on: Quantitative applications in the social sciences no 82. Newbury Park, CA: Sage, 1992.

[19] Steinauer JE, Turk JK, Fulton MC, Simonson KH, Landy U. The benefits of family planning training: a 10-year review of the Ryan Residency Training Program. *Contraception*. 2013 Feb 24: S0010-7824

Formatted: German (Germany)

[20] Nath A: HIV/AIDS and Indian youth—a review of the literature (1980-2008). *SAHARA J* 2009;6:2-8.

~~[21] Kirby DB, Laris BA, Roller LA. Sex and HIV education programs: Their impact on sexual behaviors of young people throughout the world. *J Adoles Health* 2007;40:206-17.~~

~~[22] Benzaken T, Palep AH, Gill PS. Exposure to and opinions toward sex education among adolescent students in Mumbai: A cross-sectional survey. *BMC Public Health* 2011;11:805.~~

~~[23] Collumbien M, Mishra M, Blackmore C. Youth friendly services in two rural districts of West Bengal and Jharkhand, India: Definite progress, a long way to go. *Reprod Health Matters* 2011;19:174-83.~~

[214] Brown SS, Burdette L, Rodriguez P. Looking inward: Provider-based barriers to contraception among teens and young adults. *Contraception* 2008;78:355-7.

[225] Campbell M, Sahin-Hodoglugil NN, Potts M. Barriers to fertility regulation: A review of the literature. *Stud Fam Plann* 2006;37(2):87-98.

[236] Mbizvo MT, Chou D, Shaw D. Today's evidence, tomorrow's agenda: implementation of strategies to improve global reproductive health. *Int J Gynaecol Obstet*. 2013 May;121 Suppl 1:S3-8.

Field Code Changed

[247] Jacobstein R, Curtis C, Spieler J, Radloff S. Meeting the need for modern contraception: effective solutions to a pressing global challenge. *Int J Gynaecol Obstet*. 2013 May;121 Suppl 1:S9-15.

Formatted: German (Germany)

Field Code Changed

~~[29] Krupp K, Madhivanan P. Leveraging human capital to reduce maternal mortality in India: Enhanced public health system or public-private partnership? *Hum Resour Health* 2009;7:18.~~

1  
2  
3  
4  
5  
6  
7  
8  
9  
10  
11  
12  
13  
14  
15  
16  
17  
18  
19  
20  
21  
22  
23  
24  
25  
26  
27  
28  
29  
30  
31  
32  
33  
34  
35  
36  
37  
38  
39  
40  
41  
42  
43  
44  
45  
46  
47  
48  
49  
50  
51  
52  
53  
54  
55  
56  
57  
58  
59  
60

[2530] Jejeebhoy SJ, Kalyanwala S, Mundle S, et al. Feasibility of expanding the medication abortion provider base in India to include ayurvedic physicians and nurses. *Int Perspect Sex Reprod Health* 2012;38:133-42.

[2634] Acharya R, Kalyanwala S. Knowledge, attitudes, and practices of certified providers of medical abortion: Evidence from Bihar and Maharashtra, India. *Int J Gynaecol Obstet* 2012;118 Suppl 1:S40-6.

[32] Jayaraman A, Mishra V, Arnold F. The relationship of family size and composition to fertility desires, contraceptive adoption and method choice in South Asia. *Int Perspect Sex Reprod Health* 2009;35:29-38.

[33] Char A, Saavala M, Kulmala T. Influence of mothers-in-law on young couples' family planning decisions in rural India. *Reprod Health Matters* 2010;18:154-162.

[2734] Harper CC, Brown BA, Foster-Rosales A, Raine TR. Hormonal contraceptive method choice among young, low-income women: How important is the provider? *Patient Educ Counsel* 2010;81:349-54.

[35] World Health Organization (WHO). Country health system profile: India. Geneva: WHO, 2008.

[36] Gessesew A, Barnabas GA, Prata N, Weidert K. Task shifting and sharing in Tigray, Ethiopia, to achieve comprehensive emergency obstetric care. *Int J Gynaecol Obstet* 2011;113: 28-31.

[37] Pereira C, Mbaruku G, Nzabuhakwa C, Bergström S, McCord C. Emergency obstetric surgery by non-physician clinicians in Tanzania. *Int J Gynaecol Obstet*. 2011-Aug;114(2):180-3.

[38] Culwell KR, Vekemans M, de Silva U, Hurwitz M, Crane BB. Critical gaps in universal access to reproductive health: contraception and prevention of unsafe abortion. *Int J Gynaecol Obstet*. 2010 Jul;110 Suppl:S13-6.



Research checklist for paper: Medical students' knowledge, attitudes, and perceptions on contraceptive use and counselling: a cross-sectional survey in Maharashtra, India.

STROBE Statement—Checklist of items that should be included in reports of *cross-sectional studies*

|                              | Item No | Recommendation                                                                                                                                                                                                 |
|------------------------------|---------|----------------------------------------------------------------------------------------------------------------------------------------------------------------------------------------------------------------|
| <b>Title and abstract</b>    | 1       | (a) Indicate the study's design with a commonly used term in the title or the abstract.<br><i>YES</i>                                                                                                          |
|                              |         | (b) Provide in the abstract an informative and balanced summary of what was done and what was found. <i>YES</i>                                                                                                |
| <b>Introduction</b>          |         |                                                                                                                                                                                                                |
| Background/rationale         | 2       | Explain the scientific background and rationale for the investigation being reported.<br><i>YES</i>                                                                                                            |
| Objectives                   | 3       | State specific objectives, including any prespecified hypotheses.<br><i>AIM included which correspond with Title.</i>                                                                                          |
| <b>Methods</b>               |         |                                                                                                                                                                                                                |
| Study design                 | 4       | Present key elements of study design early in the paper.<br><i>YES in abstract, focus of paper and in method section</i>                                                                                       |
| Setting                      | 5       | Describe the setting, locations, and relevant dates, including periods of recruitment, exposure, follow-up, and data collection.<br><i>YES short but focused on important aspects.</i>                         |
| Participants                 | 6       | (a) Give the eligibility criteria, and the sources and methods of selection of participants. <i>YES</i>                                                                                                        |
| Variables                    | 7       | Clearly define all outcomes, exposures, predictors, potential confounders, and effect modifiers. Give diagnostic criteria, if applicable. <i>YES.</i>                                                          |
| Data sources/<br>measurement | 8*      | For each variable of interest, give sources of data and details of methods of assessment (measurement). Describe comparability of assessment methods if there is more than one group. <i>YES.</i>              |
| Bias                         | 9       | Describe any efforts to address potential sources of bias. <i>YES in methodological considerations.</i>                                                                                                        |
| Study size                   | 10      | Explain how the study size was arrived at. <i>YES in sampling.</i>                                                                                                                                             |
| Quantitative variables       | 11      | Explain how quantitative variables were handled in the analyses. If applicable, describe which groupings were chosen and why. <i>YES</i>                                                                       |
| Statistical methods          | 12      | (a) Describe all statistical methods, including those used to control for confounding.<br><i>YES.</i>                                                                                                          |
|                              |         | (b) Describe any methods used to examine subgroups and interactions. <i>YES.</i>                                                                                                                               |
|                              |         | (c) Explain how missing data were addressed. <i>Hardly any missing data (external or internal. Missing is reported in tables.</i>                                                                              |
|                              |         | (d) If applicable, describe analytical methods taking account of sampling strategy.<br><i>Not applicable.</i>                                                                                                  |
|                              |         | (e) Describe any sensitivity analyses. <i>Not applicable.</i>                                                                                                                                                  |
| <b>Results</b>               |         |                                                                                                                                                                                                                |
| Participants                 | 13*     | (a) Report numbers of individuals at each stage of study—eg numbers potentially eligible, examined for eligibility, confirmed eligible, included in the study, completing follow-up, and analysed. <i>YES.</i> |
|                              |         | (b) Give reasons for non-participation at each stage. <i>YES.</i>                                                                                                                                              |
|                              |         | (c) Consider use of a flow diagram. <i>Not adequate.</i>                                                                                                                                                       |

|    |                          |     |                                                                                                                                                                                                                           |
|----|--------------------------|-----|---------------------------------------------------------------------------------------------------------------------------------------------------------------------------------------------------------------------------|
| 1  |                          |     |                                                                                                                                                                                                                           |
| 2  | Descriptive data         | 14* | (a) Give characteristics of study participants (eg demographic, clinical, social) and information on exposures and potential confounders. <i>YES in table 1 and then included in analyses.</i>                            |
| 3  |                          |     |                                                                                                                                                                                                                           |
| 4  |                          |     |                                                                                                                                                                                                                           |
| 5  |                          |     | (b) Indicate number of participants with missing data for each variable of interest. <i>YES reported in tables.</i>                                                                                                       |
| 6  |                          |     |                                                                                                                                                                                                                           |
| 7  |                          |     |                                                                                                                                                                                                                           |
| 8  | Outcome data             | 15* | Report numbers of outcome events or summary measures. <i>YES.</i>                                                                                                                                                         |
| 9  | Main results             | 16  | (a) Give unadjusted estimates and, if applicable, confounder-adjusted estimates and their precision (eg, 95% confidence interval). Make clear which confounders were adjusted for and why they were included. <i>YES.</i> |
| 10 |                          |     |                                                                                                                                                                                                                           |
| 11 |                          |     | (b) Report category boundaries when continuous variables were categorized. <i>Not relevant.</i>                                                                                                                           |
| 12 |                          |     |                                                                                                                                                                                                                           |
| 13 |                          |     | (c) If relevant, consider translating estimates of relative risk into absolute risk for a meaningful time period. <i>Not relevant.</i>                                                                                    |
| 14 |                          |     |                                                                                                                                                                                                                           |
| 15 |                          |     |                                                                                                                                                                                                                           |
| 16 |                          |     |                                                                                                                                                                                                                           |
| 17 |                          |     |                                                                                                                                                                                                                           |
| 18 | Other analyses           | 17  | Report other analyses done—eg analyses of subgroups and interactions, and sensitivity analyses. <i>No.</i>                                                                                                                |
| 19 |                          |     |                                                                                                                                                                                                                           |
| 20 |                          |     |                                                                                                                                                                                                                           |
| 21 | <b>Discussion</b>        |     |                                                                                                                                                                                                                           |
| 22 | Key results              | 18  | Summarise key results with reference to study objectives. <i>YES in beginning of discussion.</i>                                                                                                                          |
| 23 |                          |     |                                                                                                                                                                                                                           |
| 24 | Limitations              | 19  | Discuss limitations of the study, taking into account sources of potential bias or imprecision. Discuss both direction and magnitude of any potential bias. <i>YES included in methodological considerations.</i>         |
| 25 |                          |     |                                                                                                                                                                                                                           |
| 26 |                          |     |                                                                                                                                                                                                                           |
| 27 |                          |     |                                                                                                                                                                                                                           |
| 28 | Interpretation           | 20  | Give a cautious overall interpretation of results considering objectives, limitations, multiplicity of analyses, results from similar studies, and other relevant evidence. <i>YES.</i>                                   |
| 29 |                          |     |                                                                                                                                                                                                                           |
| 30 |                          |     |                                                                                                                                                                                                                           |
| 31 | Generalisability         | 21  | Discuss the generalisability (external validity) of the study results. <i>YES included in methodological considerations.</i>                                                                                              |
| 32 |                          |     |                                                                                                                                                                                                                           |
| 33 |                          |     |                                                                                                                                                                                                                           |
| 34 | <b>Other information</b> |     |                                                                                                                                                                                                                           |
| 35 | Funding                  | 22  | Give the source of funding and the role of the funders for the present study and, if applicable, for the original study on which the present article is based. <i>YES.</i>                                                |
| 36 |                          |     |                                                                                                                                                                                                                           |
| 37 |                          |     |                                                                                                                                                                                                                           |
| 38 |                          |     |                                                                                                                                                                                                                           |

\*Give information separately for exposed and unexposed groups.

**Note:** An Explanation and Elaboration article discusses each checklist item and gives methodological background and published examples of transparent reporting. The STROBE checklist is best used in conjunction with this article (freely available on the Web sites of PLoS Medicine at <http://www.plosmedicine.org/>, Annals of Internal Medicine at <http://www.annals.org/>, and Epidemiology at <http://www.epidem.com/>). Information on the STROBE Initiative is available at [www.strobe-statement.org](http://www.strobe-statement.org).

## Questionnaire

### Knowledge, Attitude & Perception On Contraceptive Services & Abortion Care

In order to increase our knowledge about what you think is needed in your education and for your future work we have designed this questionnaire as part of the co-operation between the pre service Comprehensive Abortion Care orientation program for interns in INDIA and Uppsala University, Sweden.

Name of the institution: \_\_\_\_\_

| Section 1: Your background       |                            |
|----------------------------------|----------------------------|
| 1.1 What is your sex?            | Female 1                   |
|                                  | Male 2                     |
| 1.2 How old are you?             | Years old .....            |
| 1.3 What is your religion?       | Hindu 1                    |
|                                  | Muslim 2                   |
|                                  | Christian 3                |
|                                  | Other ..... 4<br>(Specify) |
| 1.4 What is your marital status? | Single 1                   |
|                                  | Married 3                  |
|                                  | Other ..... 4              |
| 1.5 Where were you born?         | Rural area 1               |
|                                  | Urban area 2               |

|                                                                                                          |                                                                                                                |
|----------------------------------------------------------------------------------------------------------|----------------------------------------------------------------------------------------------------------------|
| <b>Section 2 Training</b>                                                                                |                                                                                                                |
| <b>2.6</b> What do you think are the special problems within sexual & reproductive health today in India | <b><u>Please write in your own words</u></b>                                                                   |
| <b>2.7</b> Has the topic sexual & reproductive health been included in your study programme?             | <p>Not at all 1 ( )</p> <p>Somewhat 2 ( )</p> <p>Sufficiently 3 ( )</p>                                        |
| <b>2.8</b> How do you assess your theoretical knowledge in sexual & reproductive health to be?           | <p>Poor 1 ( )</p> <p>Fair 2 ( )</p> <p>Good 3 ( )</p> <p>Very good 4 ( )</p>                                   |
| <b>2.9</b> Have you had clinical practice in abortion care services during your training?                | <p>Yes 1 ( )</p> <p>No 2 ( )</p>                                                                               |
| <b>2.11</b> Do you think counselling should be given in group or individually?                           | <p>In group 1 ( )</p> <p>Individually 2 ( )</p>                                                                |
| <b>2.12</b> Who is most suitable to give information about contraceptive methods?                        | <p>Doctor 1 ( )</p> <p>Nurses 2 ( )</p> <p>Pharmacist 3 ( )</p> <p>Health worker 4 ( )</p> <p>Others -----</p> |

|                                                                                               |     |       |
|-----------------------------------------------------------------------------------------------|-----|-------|
| 2.13 As a future doctor, would you like to have responsibility for contraceptive information? | Yes | 1 ( ) |
|                                                                                               | No  | 2 ( ) |
|                                                                                               |     |       |

|                                                                                                           |                      |   |
|-----------------------------------------------------------------------------------------------------------|----------------------|---|
| <b>Section 3 Perception on contraceptive methods</b>                                                      |                      |   |
|                                                                                                           |                      |   |
| 3.1 Has the topic contraceptive methods been included in your study programme (in school or at hospital)? | Not at all           | 1 |
|                                                                                                           | Somewhat             | 2 |
|                                                                                                           | Sufficiently         | 3 |
| 3.2 When should oral contraceptive pill be taken?                                                         | After intercourse    | 1 |
|                                                                                                           | Once a month         | 2 |
|                                                                                                           | Every day            | 3 |
| 3.4 Which contraceptive method do you think is most suitable for women?<br><br>CIRCLE ONE ANSWER          | Pill                 | 1 |
|                                                                                                           | Condom               | 2 |
|                                                                                                           | Emergency Pill       | 3 |
|                                                                                                           | IUD                  | 4 |
|                                                                                                           | Withdrawal           | 5 |
|                                                                                                           | Safe periods         | 6 |
|                                                                                                           | Female sterilization | 7 |
|                                                                                                           | Male sterilization   | 8 |

| <b>Statements</b><br>Please place a tick in the circle which you feel most appropriate answer.          | Disagree completely | Disagree | Neutral | Agree | Agree completely |
|---------------------------------------------------------------------------------------------------------|---------------------|----------|---------|-------|------------------|
| 3.5 Contraceptive pill might cause cancer                                                               | ( )                 | ( )      | ( )     | ( )   | ( )              |
| 3.6 Contraceptive pill can cause infertility                                                            | ( )                 | ( )      | ( )     | ( )   | ( )              |
| 3.7 Contraceptive pill is inconvenient to use                                                           | ( )                 | ( )      | ( )     | ( )   | ( )              |
| 3.8 Emergency contraceptive pill can be used several times a month                                      | ( )                 | ( )      | ( )     | ( )   | ( )              |
| 3.9 Condoms protects against STD/HIV                                                                    | ( )                 | ( )      | ( )     | ( )   | ( )              |
| 3.10 Contraceptive information should be only for married couples                                       | ( )                 | ( )      | ( )     | ( )   | ( )              |
| 3.12 Traditional values are barriers for sexual education in India                                      | ( )                 | ( )      | ( )     | ( )   | ( )              |
| 3.13 Sexual education encourage unmarried to have sex                                                   | ( )                 | ( )      | ( )     | ( )   | ( )              |
| 3.14 Doctors working in abortion service have friendly attitude towards unmarried clients               | ( )                 | ( )      | ( )     | ( )   | ( )              |
| 3.15 Married couples are shy to talk about contraceptive with each other                                | ( )                 | ( )      | ( )     | ( )   | ( )              |
| 3.16 Women feel confident discussing contraception with doctors                                         | ( )                 | ( )      | ( )     | ( )   | ( )              |
| 3.18 Traditional contraceptive methods (safe periods, withdrawal) are the best methods                  | ( )                 | ( )      | ( )     | ( )   | ( )              |
| Section 4 Abortion<br><br><b>Statements</b><br>Please place a tick in the circle below the right answer | Disagree completely | Disagree | Neutral | Agree | Agree completely |
| 4.1 Unsafe abortion is a serious health problem in India                                                | ( )                 | ( )      | ( )     | ( )   | ( )              |
| 4.2 Abortion among unmarried are rising in India                                                        | ( )                 | ( )      | ( )     | ( )   | ( )              |
| 4.3 Abortion is more dangerous/harmful for unmarried women than for married                             | ( )                 | ( )      | ( )     | ( )   | ( )              |

|                                                                                                                                                                                                                                                                                                                                                             |                                                                                                            |     |     |     |     |     |
|-------------------------------------------------------------------------------------------------------------------------------------------------------------------------------------------------------------------------------------------------------------------------------------------------------------------------------------------------------------|------------------------------------------------------------------------------------------------------------|-----|-----|-----|-----|-----|
| 1<br>2<br>3<br>4<br>5<br>6<br>7<br>8<br>9<br>10<br>11<br>12<br>13<br>14<br>15<br>16<br>17<br>18<br>19<br>20<br>21<br>22<br>23<br>24<br>25<br>26<br>27<br>28<br>29<br>30<br>31<br>32<br>33<br>34<br>35<br>36<br>37<br>38<br>39<br>40<br>41<br>42<br>43<br>44<br>45<br>46<br>47<br>48<br>49<br>50<br>51<br>52<br>53<br>54<br>55<br>56<br>57<br>58<br>59<br>60 | 4.4 Unmarried women have more complications from abortion than married                                     | ( ) | ( ) | ( ) | ( ) | ( ) |
|                                                                                                                                                                                                                                                                                                                                                             | 4.5 Unmarried women prefer to have abortion outside of public health clinics                               | ( ) | ( ) | ( ) | ( ) | ( ) |
|                                                                                                                                                                                                                                                                                                                                                             | 4.6 Abortion at clinics outside of the public health care are more harmful than abortion at public clinics | ( ) | ( ) | ( ) | ( ) | ( ) |
|                                                                                                                                                                                                                                                                                                                                                             | 4.7 Abortion among unmarried is acceptable in case of an unplanned pregnancy                               | ( ) | ( ) | ( ) | ( ) | ( ) |
|                                                                                                                                                                                                                                                                                                                                                             | 4.8 Abortion is morally wrong                                                                              | ( ) | ( ) | ( ) | ( ) | ( ) |
|                                                                                                                                                                                                                                                                                                                                                             | 4.9 A woman should always have the right to have an abortion in case of an unwanted pregnancy              | ( ) | ( ) | ( ) | ( ) | ( ) |
|                                                                                                                                                                                                                                                                                                                                                             | 4.10 A woman need to have her partner/spouse approval to have an abortion                                  | ( ) | ( ) | ( ) | ( ) | ( ) |
|                                                                                                                                                                                                                                                                                                                                                             | 4. 11 Abortion is not harmful if it is clinically safe                                                     | ( ) | ( ) | ( ) | ( ) | ( ) |
|                                                                                                                                                                                                                                                                                                                                                             | 4.12 Abortion clients are treated in privacy in India                                                      | ( ) | ( ) | ( ) | ( ) | ( ) |
|                                                                                                                                                                                                                                                                                                                                                             | 4.13 Women prefer to have surgical abortion rather than medical abortion                                   | ( ) | ( ) | ( ) | ( ) | ( ) |
|                                                                                                                                                                                                                                                                                                                                                             | 4. 15 Surgical abortion is more harmful than medical abortion                                              | ( ) | ( ) | ( ) | ( ) | ( ) |
|                                                                                                                                                                                                                                                                                                                                                             | 4.16 Specially trained General Nurse midwives have a potential to provide abortions in India               | ( ) | ( ) | ( ) | ( ) | ( ) |

**Thank you for your participation!**
