# Supplementary material for: Medical students’ knowledge, attitudes and perceptions towards contraceptive use and counselling: a cross-sectional survey in Maharashtra, India
Source: PubMed Central journal article supplement — BMJ Open. 2013 Dec 11;3(12):e003739. doi: 10.1136/bmjopen-2013-003739 (PMC3863118; doi:10.1136/bmjopen-2013-003739), 2013-12-11
Supplement: bmjopen-2013-003739.reviewer_comments.pdf [file bmjopen-2013-003739.reviewer_comments.pdf]

## PEER REVIEW HISTORY

BMJ Open publishes all reviews undertaken for accepted manuscripts. Reviewers are asked to complete a checklist review form ([see an example](#)) and are provided with free text boxes to elaborate on their assessment. These free text comments are reproduced below.

This paper was submitted to the The Journal of Family Planning and Reproductive Health Care but declined for publication following peer review. The authors addressed the reviewers' comments and submitted the revised paper to BMJ Open. The paper was subsequently accepted for publication at BMJ Open.

## ARTICLE DETAILS

|                            |                                                                                                                                                                     |
|----------------------------|---------------------------------------------------------------------------------------------------------------------------------------------------------------------|
| <b>TITLE (PROVISIONAL)</b> | Future physicians' knowledge, attitudes, and perceptions on contraceptive use and counselling: a cross-sectional survey among medical interns in Maharashtra, India |
| <b>AUTHORS</b>             | Hogmark, Sara; Gemzell, klingberg-allvin, marie; Kristina; Ohlsson, Hannes; Essen, Birgitta                                                                         |

## VERSION 1 - REVIEW

|                 |                  |
|-----------------|------------------|
| <b>REVIEWER</b> | Agampodi, Suneth |
|-----------------|------------------|

|                         |                                                                                                                                                                                                                                                                                                                                                                                                                                                                                                                                                                                                                                                                                                                                                                                                                                                                                                                                                                                                                                                                                                                                                                                                                                                                                                                                                                                                                                                                                                                                                                                             |
|-------------------------|---------------------------------------------------------------------------------------------------------------------------------------------------------------------------------------------------------------------------------------------------------------------------------------------------------------------------------------------------------------------------------------------------------------------------------------------------------------------------------------------------------------------------------------------------------------------------------------------------------------------------------------------------------------------------------------------------------------------------------------------------------------------------------------------------------------------------------------------------------------------------------------------------------------------------------------------------------------------------------------------------------------------------------------------------------------------------------------------------------------------------------------------------------------------------------------------------------------------------------------------------------------------------------------------------------------------------------------------------------------------------------------------------------------------------------------------------------------------------------------------------------------------------------------------------------------------------------------------|
| <b>GENERAL COMMENTS</b> | <p>This is an important study outlining the provider perceptions, attitudes and practices in relation to contraceptive use. This is timely study, specially in India, which is contributing largely to global burden of maternal mortality.</p> <p>In the methods section, the study sample should be clearly defined. The definition given was interns from 27 medical schools. But actually the sample included the participants of a one day workshop and the sample selection was purely based on workshop attendance. This should be clearly mentioned.</p> <p>In results section, most of the tables need editing. table titles are not adequately describing the tables. Presentation of results also have some concerns (please see the attached document)</p> <p>In the discussion section, the problems, myths and misnorms of these interns are not properly addressed. discussion is too lengthy, but the most important points are missing. The level of training on contraceptive methods these interns received seem highly inadequate. this issue has to be highlighted. It seems that the authors are considering these interns are from India and because of that they could have these myths, which is unacceptable.</p> <p>I'm little bit worried about the authorship. This study was entirely done in India, all participants were Indians, working in India, but none of the authors are from India. This is a widely discuss ethical issue in research where country specific data are used by outsiders. I think editors should have to look into this matter.</p> |
|-------------------------|---------------------------------------------------------------------------------------------------------------------------------------------------------------------------------------------------------------------------------------------------------------------------------------------------------------------------------------------------------------------------------------------------------------------------------------------------------------------------------------------------------------------------------------------------------------------------------------------------------------------------------------------------------------------------------------------------------------------------------------------------------------------------------------------------------------------------------------------------------------------------------------------------------------------------------------------------------------------------------------------------------------------------------------------------------------------------------------------------------------------------------------------------------------------------------------------------------------------------------------------------------------------------------------------------------------------------------------------------------------------------------------------------------------------------------------------------------------------------------------------------------------------------------------------------------------------------------------------|

- The manuscript received two reviews at The Journal of Family Planning and Reproductive Health Care recently but the other reviewer have declined to make the reviews public. Please contact BMJ Open editorial office for any further information.
